# Supplementary material
Source: PubMed Central journal article supplement (PMC2966826)
Supplement: NIHMS245298-supplement-1_si_001.pdf [file NIHMS245298-supplement-1_si_001.pdf]

# Catalytic Asymmetric Synthesis of Chiral Allylic Esters

**Jeffrey S. Cannon, Stefan F. Kirsch, Larry E. Overman**

*Department of Chemistry, 1102 Natural Sciences II, University of California, Irvine, California  
92697-2025*

## Supporting Information

|                                                                                        |         |
|----------------------------------------------------------------------------------------|---------|
| Part 1. Experimental Procedures                                                        | S2–S12  |
| Part 2. NMR spectra and HPLC, SFC,<br>and GC chromatograms of new compounds            | S13–S46 |
| • Representative <sup>1</sup> H NMR spectrum of crude<br>reaction mixture of <b>4b</b> | S13     |
| • <sup>1</sup> H NMR and <sup>13</sup> C NMR spectra                                   | S14–S35 |
| • Enantioselective chromatography traces                                               | S36–S46 |

## Experimental Section

**General Procedures.** All reactions were carried out using oven-dried glassware under an atmosphere of Ar or N<sub>2</sub> unless otherwise indicated. [(*R*<sub>p</sub>,*S*)-COP-OAc]<sub>2</sub> (**2**), [(*R*<sub>p</sub>,*S*)-COP-NHCOCCL<sub>3</sub>]<sub>2</sub> (**14**) and [(*R*<sub>p</sub>,*S*)-COP-Cl]<sub>2</sub> (**12**) and their enantiomers were prepared according to published procedures.<sup>1</sup> Currently, both enantiomers of [(*R*<sub>p</sub>,*S*)-COP-OAc]<sub>2</sub> are commercially available from Aldrich Chemical Co. (661716 and 661708). (*Z*)-Allylic trichloroacetimidates were synthesized by reaction of the corresponding allylic alcohols with trichloroacetonitrile in the presence of 1,8-diazabicyclo[5.4.0]undec-7-ene (DBU).<sup>2</sup> 5-Phenylpent-2-yn-1-ol was synthesized according to a published procedure,<sup>3</sup> and converted to (*Z*)-5-phenylpent-2-en-1-ol by reduction with P2 nickel.<sup>4</sup> Solid carboxylic acids were recrystallized from methanol. Acetic acid was distilled from acetic anhydride and CrO<sub>3</sub>. Tributyltin hydride was synthesized from lithium aluminum hydride and tributyltin chloride. Dichloromethane and diethyl ether were dried by passage through activated alumina using a GlassContour solvent purification system. Tetrahydrofuran (THF) was purified by distillation from sodium metal. Ethyl acetate was used without further purification from EMD Chemicals, Inc. All other commercial reagents were used as received unless otherwise noted. Analytical thin layer chromatography (TLC) was carried out using 0.25 mm silica plates purchased from Merck. Eluted plates were visualized using UV light and anisaldehyde stain. Silica gel chromatography was performed using 230–400 mesh silica gel purchased from Merck. Determination of enantiomeric excess was carried out using HPLC, GC, and SFC analysis using enantioselective stationary phases. Samples of racemates were used to

---

<sup>1</sup> (a) Anderson, C. E.; Kirsch, S. F.; Overman, L. E.; Richards, C. J.; Watson, M. P. *Org. Synth.* **2007**, *84*, 148–155 (b) Anderson, C. E.; Overman, L. E.; Richards, C. J.; Watson, M. P.; White, N. S. *Org. Synth.* **2007**, *84*, 139–147.

<sup>2</sup> Numata, M.; Sugimoto, M.; Koike, K.; Ogawa, T. *Carbohydr. Res.* **1987**, *163*, 209.

<sup>3</sup> Mori, M.; Tonogaki, K.; Kinoshita, A. *Org. Synth.* **2005**, *81*, 1–9.

<sup>4</sup> Brown, H. C.; Brown, C. A. *J. Am. Chem. Soc.* **1963**, *85*, 1005–1006.

calibrate enantioselective chromatographic analysis. Racemic mixtures of esters and aryl ethers were obtained by reaction of allylic trichloroacetimidates with acids in the presence of palladium(II) acetate [0.5 M CH<sub>2</sub>Cl<sub>2</sub>, rt, 5 mol% Pd(OAc)<sub>2</sub>]. <sup>1</sup>H NMR (500 MHz) and <sup>13</sup>C NMR (125 MHz) spectra were obtained on Bruker FT NMR instruments. NMR spectra are reported as δ values in ppm relative to CDCl<sub>3</sub> calibrated to 7.27 ppm in <sup>1</sup>H NMR and 77.23 in <sup>13</sup>C NMR. Splitting patterns are abbreviated as follows: singlet (s), doublet (d), triplet (t), quartet (q), multiplet (m), broad (b), apparent (app) and combinations thereof. Infrared (IR) spectra were obtained using a Varian 640-IR FT-IR spectrometer as thin films from CHCl<sub>3</sub>. Optical rotations were obtained using a JASCO J-1010 digital polarimeter. High-resolution mass spectra (HRMS) were obtained using a Waters-MicroMass Analytical LCT (ESI) spectrometer.

Experimental details and spectral data for the preparation of **4a**, **4b**, **4d–h**, **4j**, **4l**, **4r**, and **4s** can be found in the Supplementary Information that accompanies the preliminary communication.<sup>5</sup>

### General Procedure Preparing Enantioenriched 3-Acyloxy-1-alkenes.

#### (*R*)-5-Phenyl-1-penten-3-yl Benzoate (**4i**).

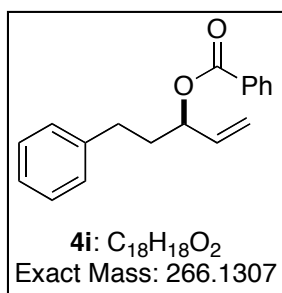

Allylic imidate **3e** (100 mg, 0.326 mmol) and benzoic acid (119 mg, 0.978 mmol) were dissolved in dichloromethane (0.33 mL). The flask was protected from light, and [(*R<sub>p</sub>*,*S*)-COP-OAc]<sub>2</sub> (**2**) (5.0 mg, 0.0033 mmol) was added. After 17 h, ethylenediamine (0.10 mL, 1.63 mmol) was added. The crude reaction mixture was concentrated under reduced pressure and the resulting residue was purified by silica gel chromatography (10% ether/hexanes) to give 74 mg (85%) of **4i** as a clear, colorless oil. Enantioselective SFC analysis indicated a 93% enantiomeric

<sup>5</sup> Kirsch, S. F.; Overman, L. E. *J. Am. Chem. Soc.* **2005**, *127*, 2866–2867.

excess [OJ column; flow: 0.55 mL/min; 28% hexanes/72% CO<sub>2</sub>; 230 nm; minor enantiomer,  $t_R$  = 17.1 min, major enantiomer,  $t_R$  = 18.8 min]:  $R_f$  0.49 (25% EtOAc/hexanes); <sup>1</sup>H NMR (500 MHz, CDCl<sub>3</sub>)  $\delta$  8.07 (d,  $J$  = 7.1 Hz, 2H, ), 7.58 (t,  $J$  = 7.5 Hz, 1H), 7.47 (t,  $J$  = 7.9 Hz, 2H), 7.31–7.27 (m, 2H), 7.21–7.18 (m, 3H), 5.95 (ddd,  $J$  = 16.9, 10.6, 6.2 Hz, 1H), 5.55 (q,  $J$  = 6.3 Hz, 1H), 5.37 (d,  $J$  = 17.2 Hz, 1H), 5.26 (d,  $J$  = 10.6 Hz, 1H), 2.81–2.71 (m, 2H), 2.20–2.03 (m, 2H); <sup>13</sup>C NMR (125 MHz CDCl<sub>3</sub>)  $\delta$  166.0, 141.5, 136.5, 133.1, 130.6, 129.8, 128.7, 128.6, 126.2, 117.2, 75.0, 36.2, 31.7;  $[\alpha]_D^{25}$  -9.55 ( $c$  0.99, CHCl<sub>3</sub>); IR (thin film) 3064, 2928, 1719 cm<sup>-1</sup>; HRMS (ESI)  $m/z$  calcd for C<sub>18</sub>H<sub>18</sub>O<sub>2</sub>Na (M + Na<sup>+</sup>) 289.1205, found 289.1200.

**(R)-5-Phenyl-1-penten-3-yl *p*-Methylbenzoate (4k).**

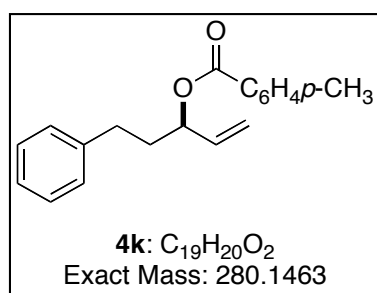

Following the general procedure, **4k** (40 mg, 85%) was obtained as a clear, colorless oil when **3e** (50 mg, 0.16 mmol) was reacted with *p*-methylbenzoic acid (65 mg, 0.48 mmol) and catalyst (*R<sub>p</sub>*,*S*)-**2** (2 mg, 0.0016 mmol). Enantioselective SFC analysis indicated a 93% enantiomeric excess [OJ column; flow: 1.0

mL/min; 28% hexanes/72% CO<sub>2</sub>; 230 nm; minor enantiomer,  $t_R$  = 15.3 min, major enantiomer,  $t_R$  = 16.8 min]:  $R_f$  0.49 (25% EtOAc/hexanes); <sup>1</sup>H NMR (500 MHz, CDCl<sub>3</sub>)  $\delta$  7.98 (d,  $J$  = 8.2 Hz, 2H), 7.32–7.28 (m, 4H), 7.23–7.20 (m, 3H), 5.96 (ddd,  $J$  = 17.0, 10.6, 6.1 Hz, 1H), 5.54 (q,  $J$  = 6.2 Hz, 1H), 5.36 (d,  $J$  = 17.2 Hz, 1H), 5.26 (d,  $J$  = 10.6 Hz, 1H), 2.79–2.75 (m, 2H), 2.45 (s, 3H), 2.19–2.07 (m, 2H); <sup>13</sup>C NMR (125 MHz CDCl<sub>3</sub>)  $\delta$  166.1, 143.8, 141.6, 136.6, 129.9, 129.3, 128.7, 128.6, 127.9, 126.2, 117.1, 74.7, 36.2, 31.7, 21.9;  $[\alpha]_D^{24}$  -7.81,  $[\alpha]_{577}^{24}$  -10.2,  $[\alpha]_{546}^{24}$  -14.0,  $[\alpha]_{435}^{24}$  -26.1 ( $c$  0.75, CHCl<sub>3</sub>); IR (thin film) 3028, 2926, 2861, 1720, 1612 cm<sup>-1</sup>; HRMS (ESI)  $m/z$  calcd for C<sub>19</sub>H<sub>20</sub>O<sub>2</sub>Na (M + Na<sup>+</sup>) 303.1361, found 303.1351.

### (*R*)-5-Phenyl-1-penten-3-yl 4-Methoxybenzoate (**4m**).

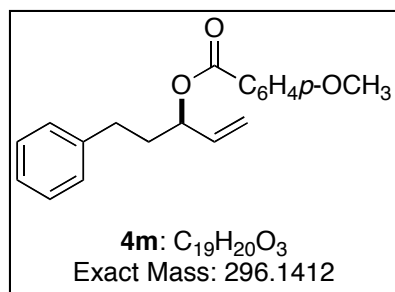

Following the general procedure, **4m** (38 mg, 79%) was obtained as a clear, colorless oil when **3e** (50 mg, 0.16 mmol) was reacted with *p*-methoxybenzoic acid (73 mg, 0.48 mmol) and catalyst (*R<sub>p</sub>,S*)-**2** (2 mg, 0.0016 mmol). Enantioselective SFC analysis indicated a 95% enantiomeric excess [OJ column; flow:

1.0 mL/min; 28% hexanes/72% CO<sub>2</sub>; 230 nm; minor enantiomer, *t<sub>r</sub>* = 20.2 min, major enantiomer, *t<sub>r</sub>* = 22.2 min]: *R<sub>f</sub>* 0.49 (25% EtOAc/hexanes); <sup>1</sup>H NMR (500 MHz, CDCl<sub>3</sub>) δ 8.03 (d, *J* = 8.9 Hz, 2H), 7.31–7.27 (m, 2H), 7.22–7.19 (m, 3H), 6.94 (d, *J* = 8.9 Hz, 2H), 5.94 (ddd, *J* = 17.1, 10.6, 6.1 Hz, 1H), 5.54 (q, *J* = 6.8 Hz, 1H), 5.36 (d, *J* = 17.2 Hz, 1H), 5.24 (d, *J* = 10.6 Hz, 1H), 3.88 (s, 3H), 2.78–2.74 (m, 2H), 2.17–2.05 (m, 2H); <sup>13</sup>C NMR (125 MHz CDCl<sub>3</sub>) δ 165.8, 163.6, 141.6, 136.7, 131.8, 128.64, 128.57, 126.2, 123.1, 117.0, 113.8, 74.6, 55.6, 36.2, 31.7; [α]<sub>D</sub><sup>25</sup> –1.98 (*c* = 0.94, CHCl<sub>3</sub>); IR (thin film) 3079, 2936, 1712, 1606 cm<sup>-1</sup>; HRMS (ESI) *m/z* calcd for C<sub>19</sub>H<sub>20</sub>O<sub>3</sub>Na (*M* + Na<sup>+</sup>) 319.1310, found 319.1304.

### (*R*)-5-Phenyl-1-penten-3-yl 4-Phenylbenzoate (**4n**).

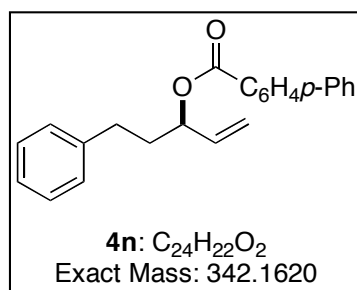

Following the general procedure, **4n** (53 mg, 95%) was obtained as a clear, colorless oil when **3e** (50 mg, 0.16 mmol) was reacted with *p*-phenylbenzoic acid (95 mg, 0.48 mmol) and catalyst (*R<sub>p</sub>,S*)-**2** (2 mg, 0.0016 mmol). Enantioselective HPLC analysis indicated an

86% enantiomeric excess [OJ column; flow: 2.0 mL/min; 0.1% isopropanol/99.9% heptanes; 230 nm; minor enantiomer, *t<sub>r</sub>* = 22.2 min, major enantiomer, *t<sub>r</sub>* = 38.9 min]<sup>6</sup>: *R<sub>f</sub>* 0.49 (25% EtOAc/hexanes); <sup>1</sup>H NMR (500 MHz, CDCl<sub>3</sub>) δ 8.14 (d, *J* = 8.3 Hz, 2H), 7.69 (d, *J* = 8.3 Hz,

<sup>6</sup> Enantiomeric excess was determined after transesterification to **4i** (i. 1.2 equiv LiAlH<sub>4</sub>, Et<sub>2</sub>O; ii. 1.2 equiv BzCl, 1.2 equiv Et<sub>3</sub>N, 0.1 equiv DMAP, CH<sub>2</sub>Cl<sub>2</sub>).

2H), 7.65 (d,  $J = 7.2$  Hz, 2H), 7.50 (t,  $J = 7.3$  Hz, 2H), 7.42 (t,  $J = 7.3$  Hz, 1H), 7.32–7.20 (m, 5H), 5.97 (ddd,  $J = 16.9, 10.6, 6.2$  Hz, 1H), 5.58 (q,  $J = 6.2$  Hz, 1H), 5.39 (d,  $J = 17.2$  Hz, 1H), 5.27 (d,  $J = 10.6$  Hz, 1H), 2.81–2.73 (m, 2H), 2.23–2.06 (m, 2H);  $^{13}\text{C}$  NMR (125 MHz,  $\text{CDCl}_3$ )  $\delta$  165.9, 145.9, 141.5, 140.3, 136.5, 130.4, 129.4, 129.2, 128.7, 128.6, 128.4, 127.5, 127.3, 126.2, 117.2, 75.0, 36.2, 31.7;  $[\alpha]_{\text{D}}^{24} -2.72$ ,  $[\alpha]_{577}^{24} -5.32$ ,  $[\alpha]_{546}^{24} -6.38$ ,  $[\alpha]_{435}^{24} -10.3$ ,  $[\alpha]_{405}^{24} -14.8$  (c 0.78,  $\text{CHCl}_3$ ); IR (thin film) 3026, 2925, 1948, 1723, 1613  $\text{cm}^{-1}$ ; HRMS (ESI)  $m/z$  calcd for  $\text{C}_{24}\text{H}_{22}\text{O}_2\text{Na}$  ( $\text{M} + \text{Na}^+$ ) 365.1518, found 365.1520.

**(R)-5-Phenyl-1-penten-3-yl 4-Chlorobenzoate (4o).**

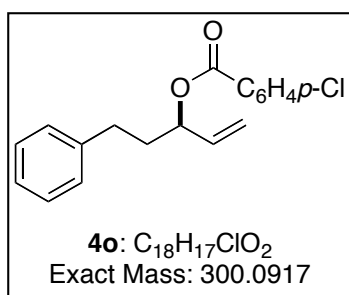

Following the general procedure, **4o** (42 mg, 86%) was obtained as a clear, colorless oil when **3e** (50 mg, 0.16 mmol) was reacted with *p*-chlorobenzoic acid (75 mg, 0.48 mmol) and catalyst ( $R_p,S$ )-**2** (2 mg, 0.0016 mmol). Enantioselective SFC analysis indicated a 97% enantiomeric excess [OJ column; flow: 1.0 mL/min; 28% hexanes/72%  $\text{CO}_2$ ; 230 nm; major enantiomer,  $t_{\text{R}} = 22.1$  min, minor enantiomer,  $t_{\text{R}} = 23.8$  min]:  $R_f$  0.049 (25% EtOAc/hexanes);  $^1\text{H}$  NMR (500 MHz,  $\text{CDCl}_3$ )  $\delta$  7.99 (d,  $J = 8.5$  Hz, 2H), 7.43 (d,  $J = 8.5$  Hz, 2H), 7.29 (t,  $J = 7.6$  Hz, 2H), 7.20 (m, 3H), 5.93 (ddd,  $J = 17.0, 10.6, 6.3$  Hz, 1H), 5.53 (q,  $J = 6.3$  Hz, 1H), 5.55 (d, 17.2 Hz, 1H), 5.27 (d,  $J = 10.6$ , 1H), 2.78–2.72 (m, 2H), 2.20–2.04 (m, 2H);  $^{13}\text{C}$  NMR (125 MHz  $\text{CDCl}_3$ )  $\delta$  165.2, 141.4, 139.6, 136.2, 131.2, 129.1, 128.9, 128.7, 128.6, 126.2, 117.5, 75.3, 36.1, 31.7;  $[\alpha]_{\text{D}}^{24} -6.86$ ,  $[\alpha]_{577}^{24} -6.49$ ,  $[\alpha]_{546}^{24} -8.97$ ,  $[\alpha]_{435}^{24} -18.1$  (c = 1.08,  $\text{CHCl}_3$ ); IR (thin film) 3026, 2927, 1720, 1594  $\text{cm}^{-1}$ ; HRMS (ESI)  $m/z$  calcd for  $\text{C}_{18}\text{H}_{17}\text{O}_2\text{ClNa}$  ( $\text{M} + \text{Na}^+$ ) 323.0815, found 323.0814.

**(R)-5-Phenyl-1-penten-3-yl *p*-Nitrobenzoate (4p).**

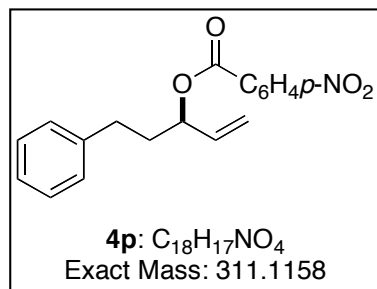

Following the general procedure, **4p** (33 mg, 65%) was obtained as a clear, colorless oil when **3e** (50 mg, 0.16 mmol) was reacted with *p*-nitrobenzoic acid (80 mg, 0.48 mmol) and catalyst (*R<sub>p</sub>,S*)-**2** (2 mg, 0.0016 mmol). Enantioselective SFC analysis indicated 87% enantiomeric excess [OJ column; flow: 2.0 mL/min; 28% hexanes/72% CO<sub>2</sub>; 230 nm; major enantiomer, *t<sub>R</sub>* = 14.5 min, minor enantiomer, *t<sub>R</sub>* = 19.1 min]: *R<sub>f</sub>* 0.38 (9:1 hexanes/EtOAc); <sup>1</sup>H NMR (500 MHz, CDCl<sub>3</sub>) δ 8.29 (d, *J* = 8.8 Hz, 2H), 8.18 (d, *J* = 8.8 Hz, 2H), 7.29 (app t, *J* = 7.7 Hz, 2H), 7.19 (m, 3H), 5.94 (ddd, *J* = 17.0, 10.6, 6.4 Hz, 1H), 5.56 (q, *J* = 6.4 Hz, 1H), 5.37 (d, 17.0 Hz, 1H), 5.30 (d, 10.6 Hz, 1H), 2.76 (t, *J* = 8.0 Hz), 2.22–2.09 (m, 2H); <sup>13</sup>C NMR (125 MHz CDCl<sub>3</sub>) δ 164.1, 150.7, 141.2, 136.0, 135.8, 130.9, 128.8, 128.6, 126.3, 123.7, 118.1, 76.4, 35.9, 31.7; [α]<sub>D</sub><sup>24</sup> –3.10, [α]<sub>577</sub><sup>24</sup> –3.41, [α]<sub>546</sub><sup>24</sup> –5.13, [α]<sub>435</sub><sup>24</sup> –6.07 (c 0.28, CHCl<sub>3</sub>); IR (thin film) 3027, 2928, 2860, 1725, 1528, 1275 cm<sup>-1</sup>; HRMS (ESI) *m/z* calcd for C<sub>18</sub>H<sub>17</sub>NO<sub>4</sub>NH<sub>4</sub> (M + NH<sub>4</sub><sup>+</sup>) 329.1501, found 329.1509.

**(R)-5-Phenyl-1-penten-3-yl *o*-Chlorobenzoate (4q).**

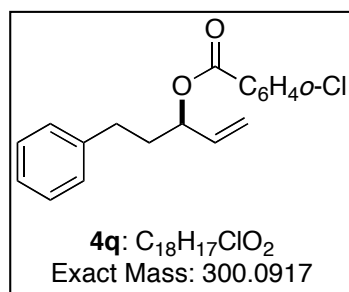

Following the general procedure, **4q** (12 mg, 24%) was obtained as a clear, colorless oil when **3e** (50 mg, 0.16 mmol) was reacted with *o*-chlorobenzoic acid (75 mg, 0.48 mmol) and catalyst (*R<sub>p</sub>,S*)-**2** (2 mg, 0.0016 mmol). Enantioselective SFC analysis indicated 46% enantiomeric excess [OJ column; flow: 1.0 mL/min; 28% hexanes/72% CO<sub>2</sub>; 230 nm; major enantiomer, *t<sub>R</sub>* = 15.0 min, minor enantiomer, *t<sub>R</sub>* = 16.3 min]: *R<sub>f</sub>* 0.49 (25% EtOAc/hexanes); <sup>1</sup>H NMR (500 MHz, CDCl<sub>3</sub>) δ 7.81 (d, *J* = 7.7 Hz, 1H), 7.48–7.42 (m, 2H), 7.35–7.27 (m, 3H), 7.22–7.20 (m, 3H), 5.94 (ddd, *J* = 17.1, 10.5, 6.5 Hz, 1H), 5.55

(q,  $J = 6.4$  Hz, 1H), 5.39 (d,  $J = 17.2$  Hz, 1H), 5.28 (d,  $J = 10.5$  Hz, 1H), 2.79–2.74 (m, 2H), 2.19–2.05 (m, 2H);  $^{13}\text{C}$  NMR (125 MHz  $\text{CDCl}_3$ )  $\delta$  165.3, 141.5, 136.1, 133.8, 132.7, 131.5, 131.3, 130.7, 128.7, 128.6, 126.8, 126.2, 117.9, 76.0, 36.1, 31.7;  $[\alpha]_{\text{D}}^{24} -2.48$ ,  $[\alpha]_{577}^{24} -6.37$ ,  $[\alpha]_{546}^{24} -4.27$ ,  $[\alpha]_{435}^{24} -8.81$  (c 0.38,  $\text{CHCl}_3$ ); IR (thin film) 3022, 2921, 1733, 1599  $\text{cm}^{-1}$ ; HRMS (ESI)  $m/z$  calcd for  $\text{C}_{18}\text{H}_{17}\text{O}_2\text{ClNa}$  ( $\text{M} + \text{Na}^+$ ) 323.0815, found 323.0813.

**(R)-5-Phenyl-1-penten-3-yl Pivaloate (4t).**

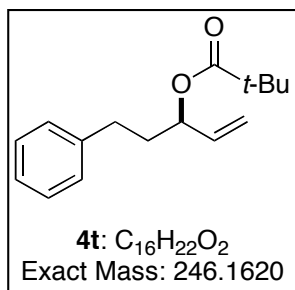

Following the general procedure, **4t** (38 mg, 95%) was obtained as a clear, colorless oil when **3e** (50 mg, 0.16 mmol) was reacted with pivalic acid (49 mg, 0.48 mmol) and catalyst ( $R_p,S$ )-**2** (2 mg, 0.0016 mmol). Enantioselective HPLC analysis indicated a 94% enantiomeric excess [OJ column; flow: 2.0 mL/min; 0.1% isopropanol/99.9%

heptanes; 230 nm; minor enantiomer,  $t_{\text{R}} = 22.2$  min, major enantiomer,  $t_{\text{R}} = 38.9$  min]<sup>6</sup>: Spectral data matched that previously reported in the literature.<sup>7</sup>  $[\alpha]_{\text{D}}^{24} -2.09$ ,  $[\alpha]_{577}^{24} -1.42$ ,  $[\alpha]_{546}^{24} -0.59$  (c 1.03,  $\text{CHCl}_3$ ).

**(R)-5-Phenyl-1-penten-3-yl Adamantane-1-carboxylate (4u).**

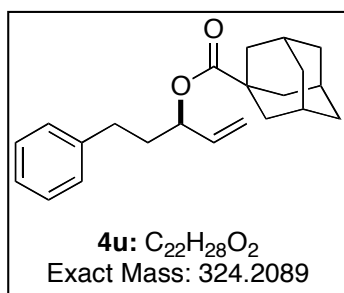

Following the general procedure, **4u** (36 mg, 68%) was obtained as a clear, colorless oil when **3e** (50 mg, 0.16 mmol) was reacted with 1-adamantanecarboxylic acid (86 mg, 0.48 mmol) and catalyst ( $R_p,S$ )-**2** (2 mg, 0.0016 mmol). **4u** was derivatized to the Mosher's

ester (1. LAH,  $\text{Et}_2\text{O}$ , 2. (+)-MTPA, DCC, DMAP).  $^1\text{H}$  NMR analysis indicated an enantiomeric excess of 86%:<sup>8</sup>  $R_f$  0.049 (25%  $\text{EtOAc}$ /hexanes);  $^1\text{H}$  NMR (500 MHz,  $\text{CDCl}_3$ )  $\delta$  7.30 (app q,  $J = 7.4$  Hz, 2H), 7.22–7.17 (m, 3H), 5.83 (ddd,  $J = 17.0, 10.6, 5.9$  Hz, 1H), 5.31–5.24 (m, 2H), 5.18

<sup>7</sup> Evans, P. A.; Leahy, D. K. *J. Am. Chem. Soc.* **2002**, *124*, 7882–7883.

<sup>8</sup> Dale, J. A.; Mosher, H. S. *J. Am. Chem. Soc.* **1973**, *95*, 512–519.



(d,  $J = 10.6$  Hz, 1H), 2.70–2.63 (m, 2H), 2.05 (s, 3H), 2.00–1.90 (m, 8H), 1.75 (app t,  $J = 15.2$  Hz, 6H);  $^{13}\text{C}$  NMR (125 MHz  $\text{CDCl}_3$ )  $\delta$  177.0, 141.7, 136.8, 128.64, 128.55, 126.2, 116.4, 73.4, 41.1, 39.1, 36.7, 36.2, 31.6, 28.2;  $[\alpha]_{\text{D}}^{24} -7.38$ ,  $[\alpha]_{577}^{24} -7.44$ ,  $[\alpha]_{546}^{24} -8.24$ ,  $[\alpha]_{435}^{24} -15.7$ ,  $[\alpha]_{405}^{24} -20.7$  (c 1.72,  $\text{CHCl}_3$ ); IR (thin film) 3024, 2906, 1726  $\text{cm}^{-1}$ ; HRMS (ESI)  $m/z$  calcd for  $\text{C}_{22}\text{H}_{28}\text{O}_2\text{Na}$  ( $\text{M} + \text{Na}^+$ ) 347.1987, found 347.1987.

**(R)-5-Phenyl-1-penten-3-yl Indole-3-acetate (4v).**

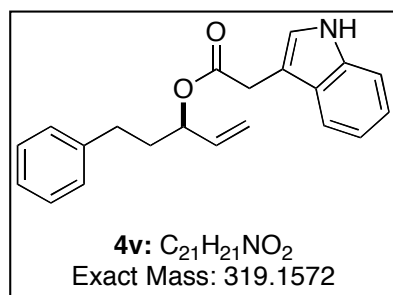

Following the general procedure, **4v** (34 mg, 65%) was obtained as a clear, colorless oil when **3e** (50 mg, 0.16 mmol) was reacted with indole-3-acetic acid (84 mg, 0.48 mmol) and catalyst ( $R_p,S$ )-**2** (2 mg, 0.0016 mmol). Enantioselective HPLC analysis indicated a 96% enantiomeric excess [OJ column; flow: 1.0 mL/min; 30% isopropanol/70% hexanes; 254 nm; minor enantiomer,  $t_{\text{R}} = 35.9$  min, major enantiomer,  $t_{\text{R}} = 45.7$  min];  $R_f$  0.27 (25% EtOAc/hexanes);  $^1\text{H}$  NMR (500 MHz,  $\text{CDCl}_3$ )  $\delta$  8.14 (s, 1H), 7.70 (d,  $J = 7.9$  Hz, 1H), 7.38 (d,  $J = 8.1$  Hz, 1H), 7.30–7.09 (m, 6H), 7.08 (d,  $J = 7.2$  Hz, 2H), 5.86 (ddd,  $J = 17.0, 10.6, 6.3$  Hz, 1H), 5.34 (q,  $J = 6.3$  Hz, 1H), 5.27 (d,  $J = 17.3$  Hz, 1H), 5.21 (d,  $J = 10.6$  Hz, 1H), 3.84 (s, 2H), 2.64–2.55 (m, 2H), 2.04–1.90 (m, 2H);  $^{13}\text{C}$  NMR (125 MHz  $\text{CDCl}_3$ )  $\delta$  171.6, 141.5, 136.4, 136.3, 128.6, 128.5, 127.4, 126.1, 123.2, 122.4, 119.9, 119.1, 117.2, 111.4, 108.7, 74.7, 36.1, 31.8, 31.5;  $[\alpha]_{\text{D}}^{24} 5.89$ ,  $[\alpha]_{577}^{24} 5.41$ ,  $[\alpha]_{546}^{24} 6.43$ ,  $[\alpha]_{435}^{24} 11.2$  (c 1.10,  $\text{CHCl}_3$ ); IR (thin film) 3415, 3059, 2927, 1726  $\text{cm}^{-1}$ ; HRMS (ESI)  $m/z$  calcd for  $\text{C}_{21}\text{H}_{21}\text{O}_2\text{NNa}$  ( $\text{M} + \text{Na}^+$ ) 342.1470, found 342.1466.

**(R)-5-Phenyl-1-penten-3-yl Tris(tert-butyldimethylsilyl)cholate (4w).**

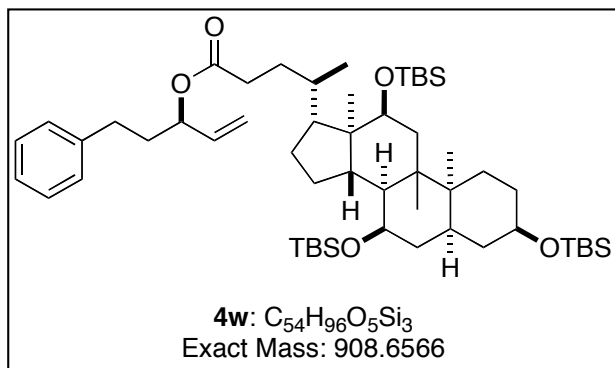

Following the general procedure, **4w** (53 mg, 91%) was obtained as a clear, colorless oil when **3e** (20 mg, 0.065 mmol) was reacted with TBS-protected cholic acid (150 mg, 0.20 mmol) and catalyst (*R<sub>p</sub>,S*)-**2** (2 mg, 0.00065 mmol). Enantioselective HPLC analysis

indicated a 91% diastereomeric excess [OJ column; flow: 2.0 mL/min; 0.1% isopropanol/99.9% heptanes; 230 nm; minor enantiomer,  $t_R = 22.2$  min, major enantiomer,  $t_R = 38.9$  min]<sup>7</sup>;  $R_f$  0.049 (25% EtOAc/hexanes); <sup>1</sup>H NMR (500 MHz, CDCl<sub>3</sub>)  $\delta$  7.29 (t,  $J = 7.4$  Hz, 2H), 7.22–7.17 (m, 3H), 5.83 (ddd,  $J = 17.1, 10.5, 6.4$  Hz, 1H), 5.30–5.25 (m, 2H), 5.20 (d,  $J = 10.5$  Hz, 1H), 3.98 (s, 1H), 3.80 (s, 1H), 3.39–3.30 (m, 1H), 2.69–2.63 (m, 2H), 2.39–2.14 (m, 5H), 2.00–1.85 (m, 6H), 1.71–1.59 (m, 2H), 1.55–1.40 (m, 7H), 1.39–1.23 (m, 4H), 0.97–0.86 (m, 36H), 0.67 (s, 3H), 0.10–0.01 (m, 18H); <sup>13</sup>C NMR (125 MHz CDCl<sub>3</sub>)  $\delta$  173.7, 141.6, 136.7, 128.64, 128.57, 126.2, 117.2, 74.2, 74.0, 72.3, 69.8, 47.5, 46.2, 42.2, 41.6, 41.1, 40.8, 36.3, 36.1, 35.6, 35.1, 35.0, 32.3, 31.7, 31.5, 31.3, 29.9, 28.7, 27.9, 26.7, 26.6, 26.3, 25.9, 24.1, 23.2, 18.6, 18.1, 13.0, 1.3, –2.7, –4.0, –4.4, –5.2;  $[\alpha]_D^{24}$  22.6,  $[\alpha]_{577}^{24}$  24.0,  $[\alpha]_{546}^{24}$  26.2,  $[\alpha]_{435}^{24}$  41.9 ( $c$  2.44, CHCl<sub>3</sub>); IR (thin film) 2934, 2859, 1735, 1466 cm<sup>-1</sup>; HRMS (ESI)  $m/z$  calcd for C<sub>53</sub>H<sub>94</sub>O<sub>5</sub>Si<sub>3</sub>Na (M + Na<sup>+</sup>) 917.6307, found 917.6313.

### (*R*)-5-Phenyl-1-penten-3-yl Acrylate (**4x**).

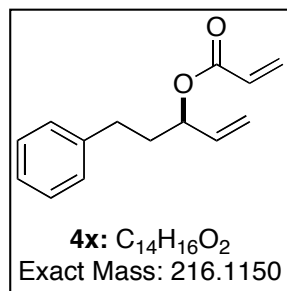

Following the general procedure, **4x** (13 mg, 37%) was obtained as a clear, colorless oil from **3e** (50 mg, 0.16 mmol) was reacted with acrylic acid (35 mg, 0.48 mmol) and catalyst (*R<sub>p</sub>,S*)-**2** (2 mg, 0.0016 mmol): R<sub>f</sub> 0.49 (25% EtOAc/hexanes); Spectral data matched those previously reported in the literature.<sup>9</sup>

### General Procedure for Enantioselective One-Pot Synthesis of 3-Acyloxy-1-alkenes from Prochiral (*Z*)-Allylic Alcohols

#### (*R*)-5-Phenyl-1-penten-3-yl Acetate (**4c**).

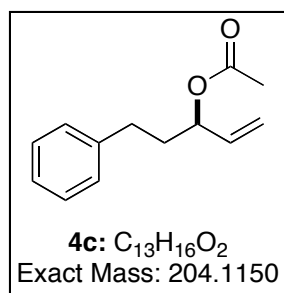

DBU (9  $\mu$ L, 1M solution in CH<sub>2</sub>Cl<sub>2</sub>) was added to a solution of 5-phenylpent-2-en-1-ol (50 mg, 0.31 mmol), trichloroacetonitrile (31  $\mu$ L, 0.31 mmol) and CH<sub>2</sub>Cl<sub>2</sub> (0.3 mL). The solution was maintained at room temperature for 7 h, then acetic acid (53  $\mu$ L, 0.93 mmol) was added, followed by [(*R<sub>p</sub>,S*)-COP-OAc]<sub>2</sub> (**2**, 4.7 mg, 1 mol%). After 17 h, the solution was concentrated under reduced pressure and the residue was purified by silica gel chromatography (10% Et<sub>2</sub>O/hexanes) to provide 49 mg (78%) of **4c** as a clear, colorless oil: Enantioselective GC analysis indicated 91% enantiomeric excess [Cyclosil-B; flow: 1.5 mL/min; 40 min at 130 °C; major enantiomer, t<sub>R</sub> = 28.15 min, minor enantiomer, t<sub>R</sub> = 30.36 min]: <sup>1</sup>H NMR (500 MHz, CDCl<sub>3</sub>)  $\delta$  7.30 (app t, *J* = 7.4 Hz, 2H), 7.20 (dd, *J* = 11.7, 7.2 Hz, 3H), 5.83 (ddd, *J* = 17.1, 10.6, 6.2 Hz, 1H), 5.29 (q, *J* = 6.5 Hz, 1H), 5.28 (d, *J* = 17.1 Hz, 1H), 5.22 (d, *J* = 10.5 Hz, 1H), 2.70–2.65 (m, 2H), 2.08 (s, 3H), 2.06–1.88 (m, 2H); <sup>13</sup>C NMR (125 MHz CDCl<sub>3</sub>)

<sup>9</sup> Binder, J. T.; Kirsch, S. F. *Chem. Commun.* **2007**, 4164–4166.

$\delta$  170.5, 141.5, 136.5, 128.6, 128.5, 126.2, 117.1, 74.5, 36.0, 31.6, 21.4;  $[\alpha]_D^{24}$  36.7,  $[\alpha]_{577}^{24}$  41.1 (c 1.31, CHCl<sub>3</sub>); IR (thin film) 3028, 2950, 1739, 1604, 1238 cm<sup>-1</sup>; HRMS (ESI) m/z calcd for C<sub>13</sub>H<sub>16</sub>O<sub>2</sub>Na (M + Na<sup>+</sup>) 227.1048, found 227.1041.

**2-(Trichloromethyl)-4,5-dihydro-4-vinyloxazole (5).**

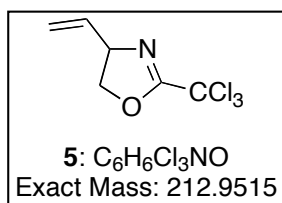

(*R*<sub>p</sub>,*S*)-[COP-OAc]<sub>2</sub> (**2**, 11.3 mg, 5 mol %) was added to a solution of imidate **3a** (40 mg, 0.15 mmol) in CH<sub>2</sub>Cl<sub>2</sub> (0.3 mL, 0.5 M), and the solution was heated to 38 °C and overnight. At completion (TLC), the reaction mixture was concentrated under reduced pressure and the residue was purified by silica gel chromatography (15% EtOAc/hexanes) to give 13 mg (41%) of **5** as a clear, colorless oil and 10 mg (38%) of **4a** as a clear, colorless oil. Characterization data for **5**: R<sub>f</sub> 0.56 (10% EtOAc/hexanes). <sup>1</sup>H NMR (500 MHz, CDCl<sub>3</sub>)  $\delta$  4.35 (t, *J* = 8.3 Hz, 1H), 4.74–4.78 (m, 1H), 4.84–4.89 (m, 1H), 5.25–5.34 (m, 2H), 5.88 (ddd, *J* = 17.2, 10.1, 6.3 Hz, 1H); <sup>13</sup>C NMR (125 MHz, CDCl<sub>3</sub>)  $\delta$  163.1, 135.6, 118.1, 86.5, 75.7, 68.8; IR (thin film) 2988, 2907, 1770, 1707, 1514 cm<sup>-1</sup> HRMS (ESI) m/z calcd for C<sub>6</sub>H<sub>7</sub>Cl<sub>3</sub>NO (M + H)<sup>+</sup> 213.9593, found 213.9589.

sk-ii-121 crude, 20 h  
 1H spectrum

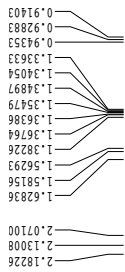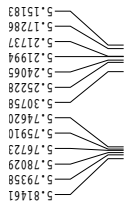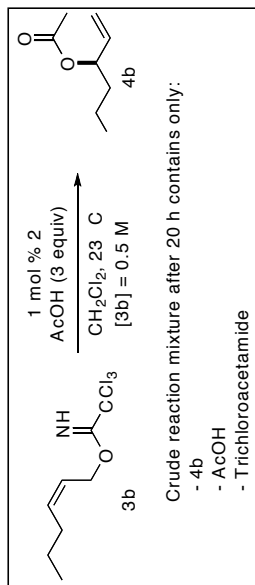

```

Current Data Parameters
USER          camron
NAME          sk-ii-121crude
EXPNO        1
PROCNO       1

F2 - Acquisition Parameters
File_         20041101
Time_        10.03
INSTRUM      omega500
PROBHD       5 mm broadband
PULPROG      zg30
TD           81728
SOLVENT      CDCl3
NS           8
DS           2
SWH          8012.820 Hz
FIDRES      0.098043 Hz
AQ          5.0998774 sec
RG          406.4
DW          62.400 usec
DE          6.00 usec
TE          300.0 K
D1          0.10000000 sec

===== CHANNEL f1 =====
NUC1         1H
P1          13.00 usec
PL1         -1.00 dB
SFO1        500.2235015 MHz

F2 - Processing parameters
SI          65536
SF          500.2200263 MHz
WDW         EM
SSB         0
LB          0.30 Hz
GB          0
PC          4.00

JD NMR plot parameters
CX          22.80 cm
CY          15.00 cm
CZ          0.00 cm
E1P         450.198 ppm
E2P         -1.062 ppm
FZ          -531.20 Hz
PFGMCON    0.44131 ppm/cm
HZCM       220.75362 Hz/cm
  
```

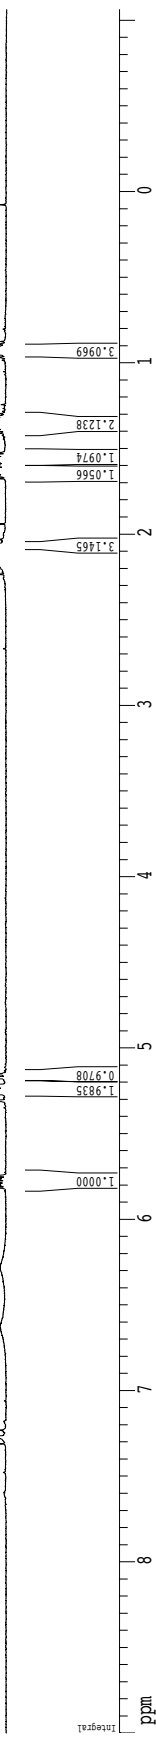



Z-restored spin-echo 13C spectrum with 1H decoupling

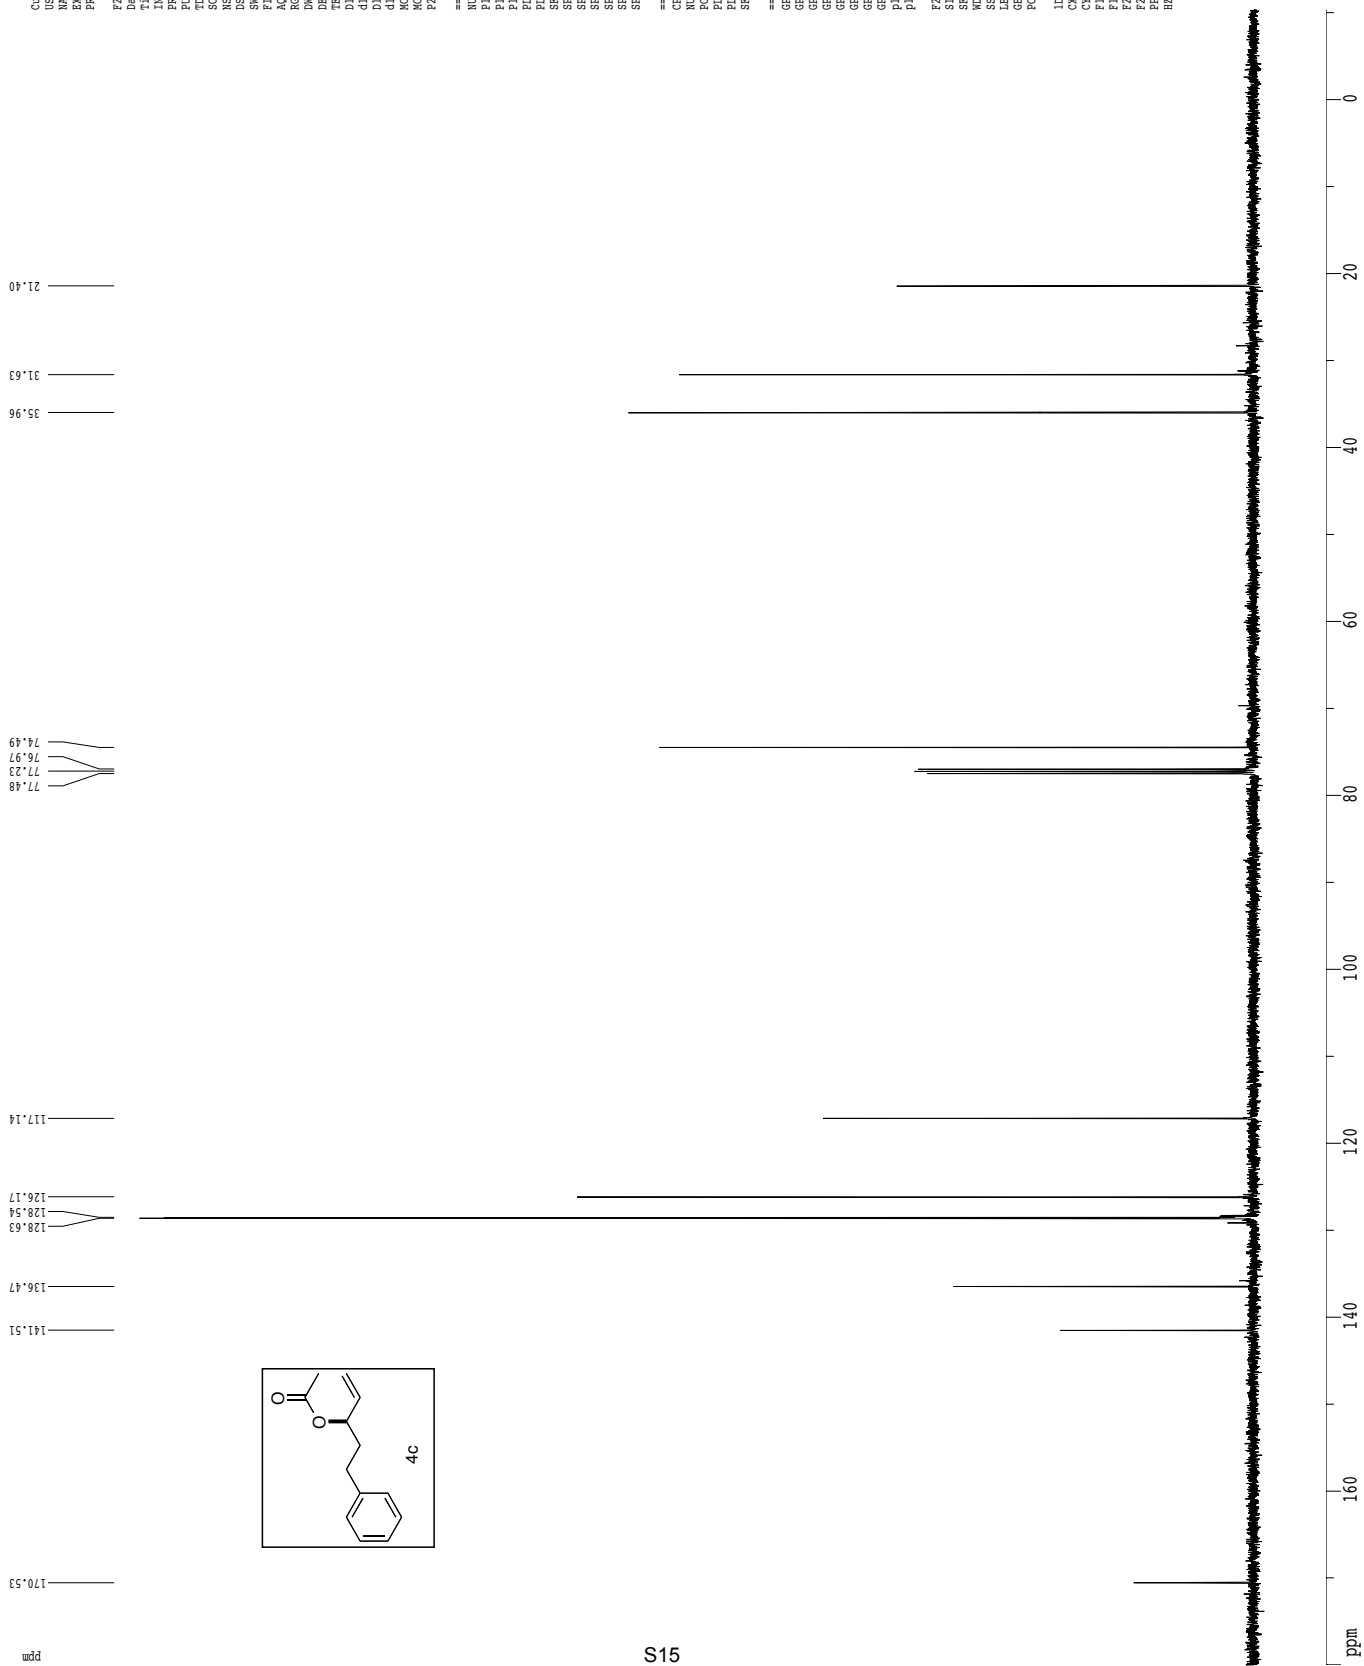

1H spectrum

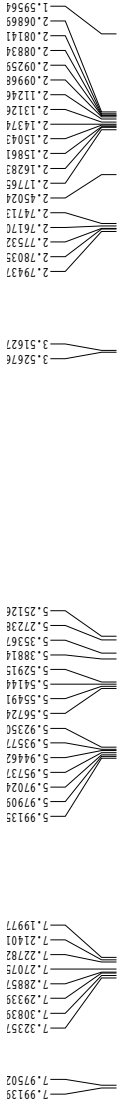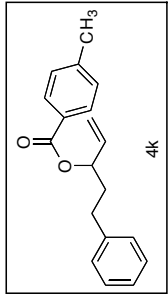

Current Data Parameters  
 USER camcon  
 NAME JSC1092-1  
 EXPNO 2  
 PROCNO 1  
 F2 - Acquisition Parameters  
 Date\_ 20081008  
 Time 15.41  
 INSTRUM crys500  
 PROBD 5 mm CPCL1 H-  
 PULPROG zg30  
 TD 81728  
 SOLVENT CDCL3  
 NS 6  
 DS 6  
 SH 8012.820 Hz  
 SF 0.098043 Hz  
 FIDRES 5.0998774 sec  
 AQ 6.3  
 RG 62.400 usec  
 DW 6.00 usec  
 DE 288.0 K  
 TE 0.1000000 sec  
 ACQSF 0.0000000 sec  
 MCNCR 0.01500000 sec  
 ===== CHANNEL f1 =====  
 NUCL1 1H  
 P1 7.50 usec  
 PL1 1.60 dB  
 SFO1 500.2235015 MHz  
 F2 - Processing Parameters  
 SI 65536  
 SF 500.2200166 MHz  
 WDM EM  
 SSB 0  
 LB 0.30 Hz  
 GB 0  
 PC 4.00  
 LD MMR plot parameters  
 CY 22.80 cm  
 CX 15.00 cm  
 FIP 9.000 ppm  
 F1 4501.98 Hz  
 F2F -1.042 ppm  
 F2 -521.42 Hz  
 PPMCN 0.44046 ppm/cm  
 HZCN 220.32463 Hz/cm

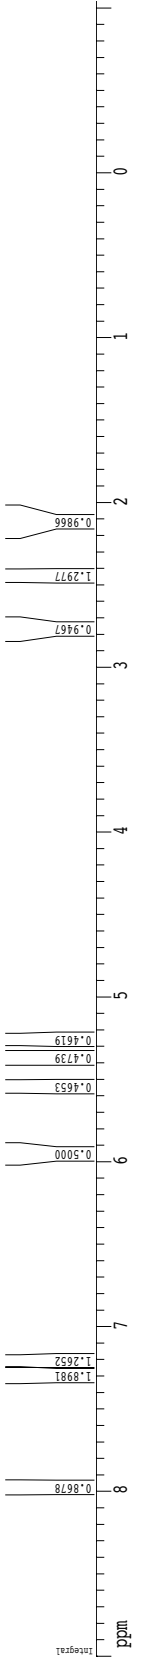



Z-restored spin-echo 13C spectrum with 1H decoupling

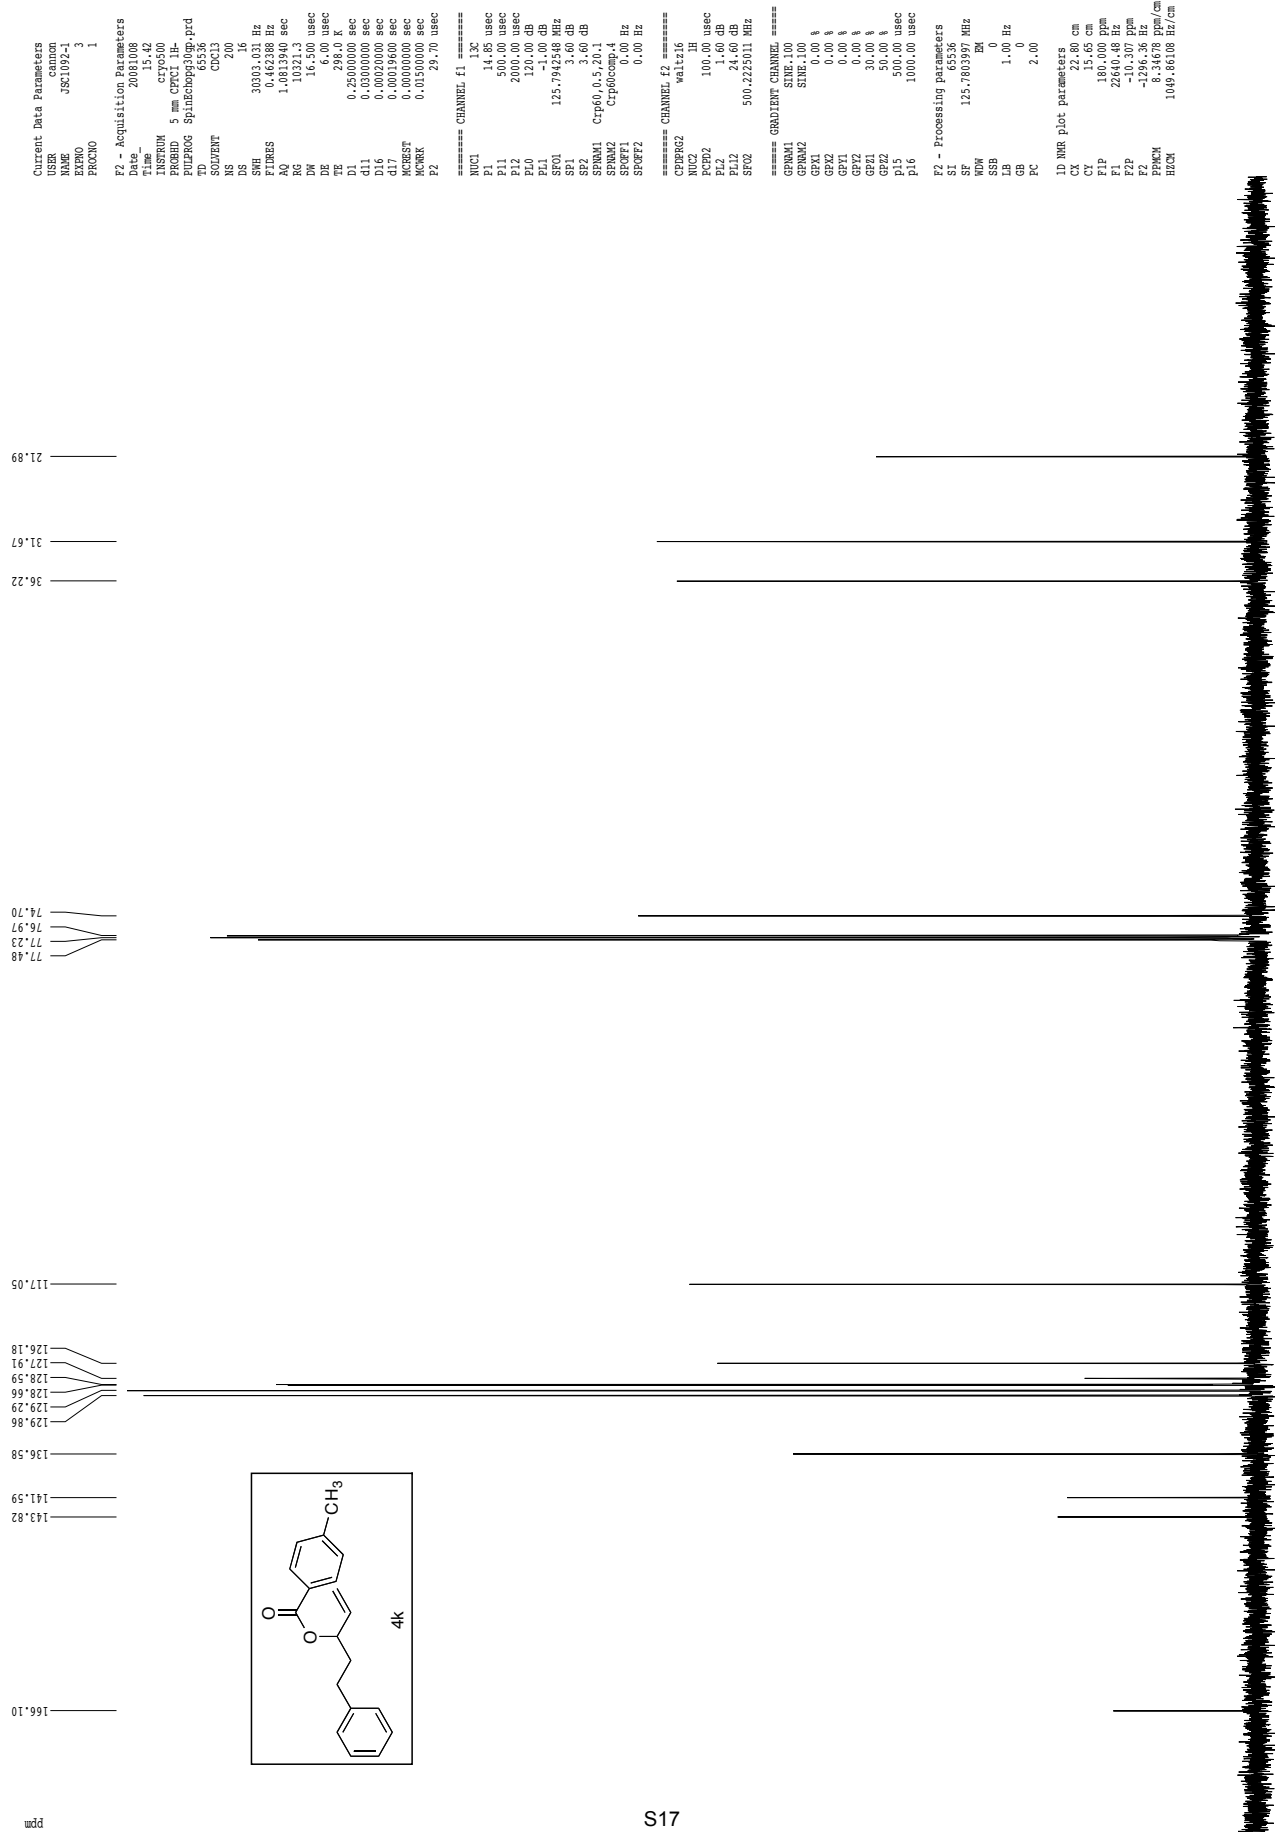

Current Data Parameters  
 USER canon  
 NAME JSC1092-1  
 EXNO 3  
 PROCNO 1  
 P2 - Acquisition Parameters  
 Da\_ 20081008  
 Time\_ 15.42  
 INSTRUM cryo500  
 PROBHD 5 mm CPTCI IH-  
 PULPROG spinEcho30gprd  
 TD 6536  
 SOLVENT CDCl3  
 NS 200  
 DS 36  
 SWH 30003.031 Hz  
 FIDRES 0.462388 Hz  
 AQ 1.0813940 sec  
 RG 10221.3  
 RW 16.50 usec  
 DR 16.00 usec  
 TE 298.0 K  
 D1 0.2500000 sec  
 d11 0.0300000 sec  
 D16 0.0002000 sec  
 d17 0.0001960 sec  
 DELTA 0.0000000 sec  
 ACQPRG1  
 MCHRG1 0.0150000 sec  
 P2 29.70 usec

==== CHANNEL F1 =====  
 NUC1 13C  
 P1 14.45 usec  
 PL1 0.00 dB  
 PL2 2000.00 usec  
 PL0 120.00 dB  
 PL1 -1.00 dB  
 SF01 125.7942548 MHz  
 SFO 3.40 dB  
 SPAN1 Crp60.0.5.20.0 GB  
 SPAN2 Crp60cm0.4  
 SFOF1 0.00 Hz  
 SFOF2 0.00 Hz

==== CHANNEL F2 =====  
 NUC2 1H  
 P1 100.00 usec  
 PL2 1.60 dB  
 PL12 24.60 dB  
 SF02 500.2225011 MHz  
 SFO2 50.00 usec  
 SPAN1  
 SPAN2  
 SFOF1  
 SFOF2

==== GRADIENT CHANNEL =====  
 GPM1 SINE 1.00  
 GPM2 SINE 1.00  
 GPC 0.00 %  
 GPC 50.00 %  
 p15 500.00 usec  
 p16 1000.00 usec  
 P2 - Processing parameters  
 SI 6558  
 SF 125.7803927 MHz  
 NDM EM  
 SSB 0  
 LB 1.00 Hz  
 GB 0  
 PC 2.00  
 ID WRR plot parameters  
 CY 22.80 cm  
 CY 15.65 cm  
 FIP 180.000 ppm  
 F1 Z640.48 Hz  
 F2 -10.307 ppm  
 F3 10.307 ppm  
 FWHM 8.24678 Hz/cm  
 RESCN 1049.865108 Hz/cm

**<sup>1</sup>H spectrum**

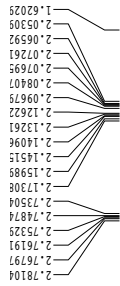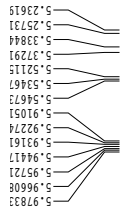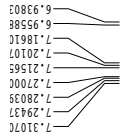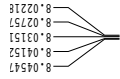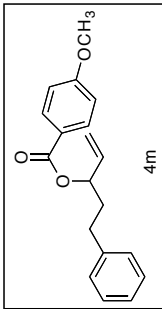

Current Data Parameters  
 USER camcon  
 NAME JSC1100  
 EXPNO 3  
 PROCNO 1

F2 - Acquisition Parameters  
 Date\_ 20081002  
 Time 10.34  
 INSTRUM cryo500  
 PROBD 5 mm CPCL1 H-  
 PULPROG zg30  
 TD 81728  
 SOLVENT CDCL3  
 NS 6  
 DS 2  
 SH 8012.820 Hz  
 SF 0.098043 Hz  
 FIDRES 5.0998774 sec  
 AQ 14.3  
 RG 62.400 usec  
 DE 6.00 usec  
 TE 298.0 K  
 0.1000000 sec  
 0.0000000 sec  
 0.01500000 sec

==== CHANNEL f1 =====  
 NUC1 1H  
 P1 7.38 usec  
 PL1 1.60 dB  
 SFO1 500.2235015 MHz

F2 - Processing Parameters  
 SI 65536  
 SF 500.2200254 MHz  
 WDM EM  
 SSB 0  
 LB 0.30 Hz  
 GB 0  
 PC 4.00

1D NMR plot parameters  
 CX 22.80 cm  
 CY 15.00 cm  
 FIP 9.000 ppm  
 F1 4501.98 Hz  
 F2P -1.060 ppm  
 F2 -530.22 Hz  
 PPMCN 0.44123 ppm/cm  
 HZCN 220.71075 Hz/cm

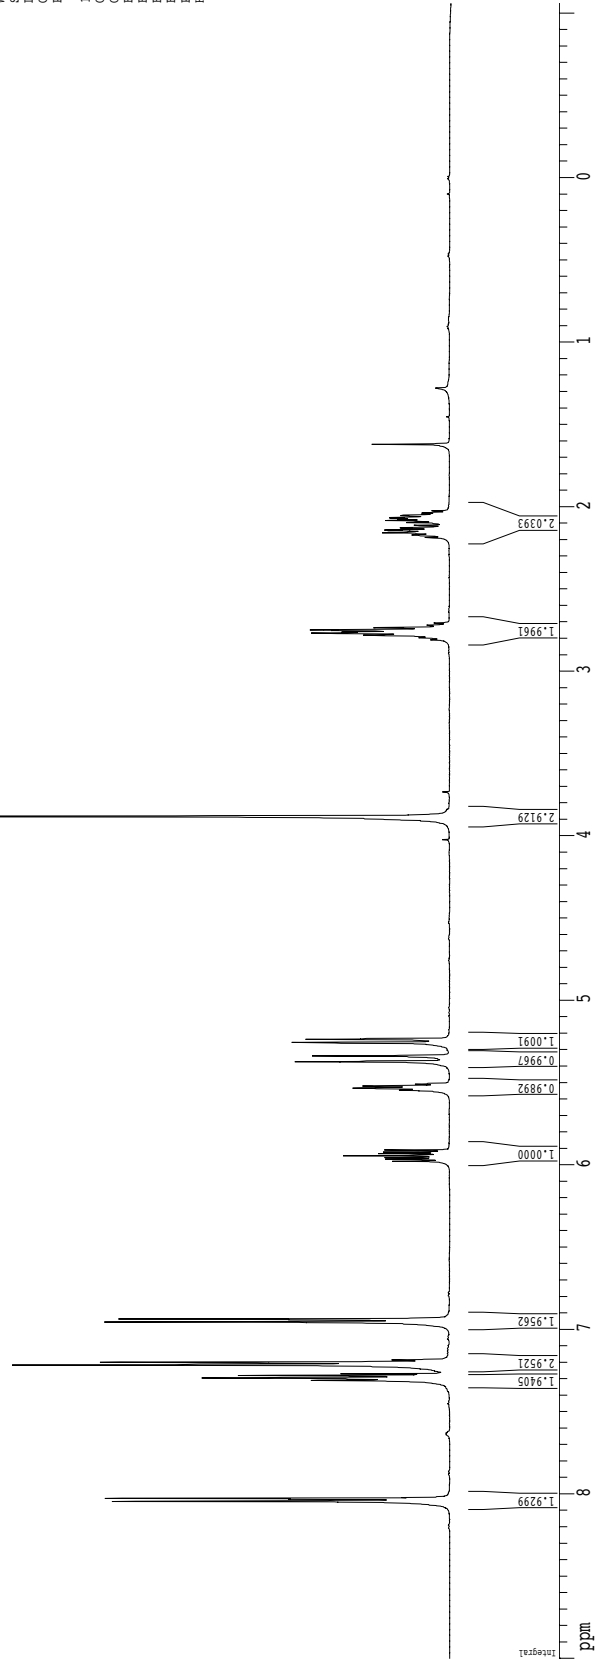

13C spectrum with 1H decoupling

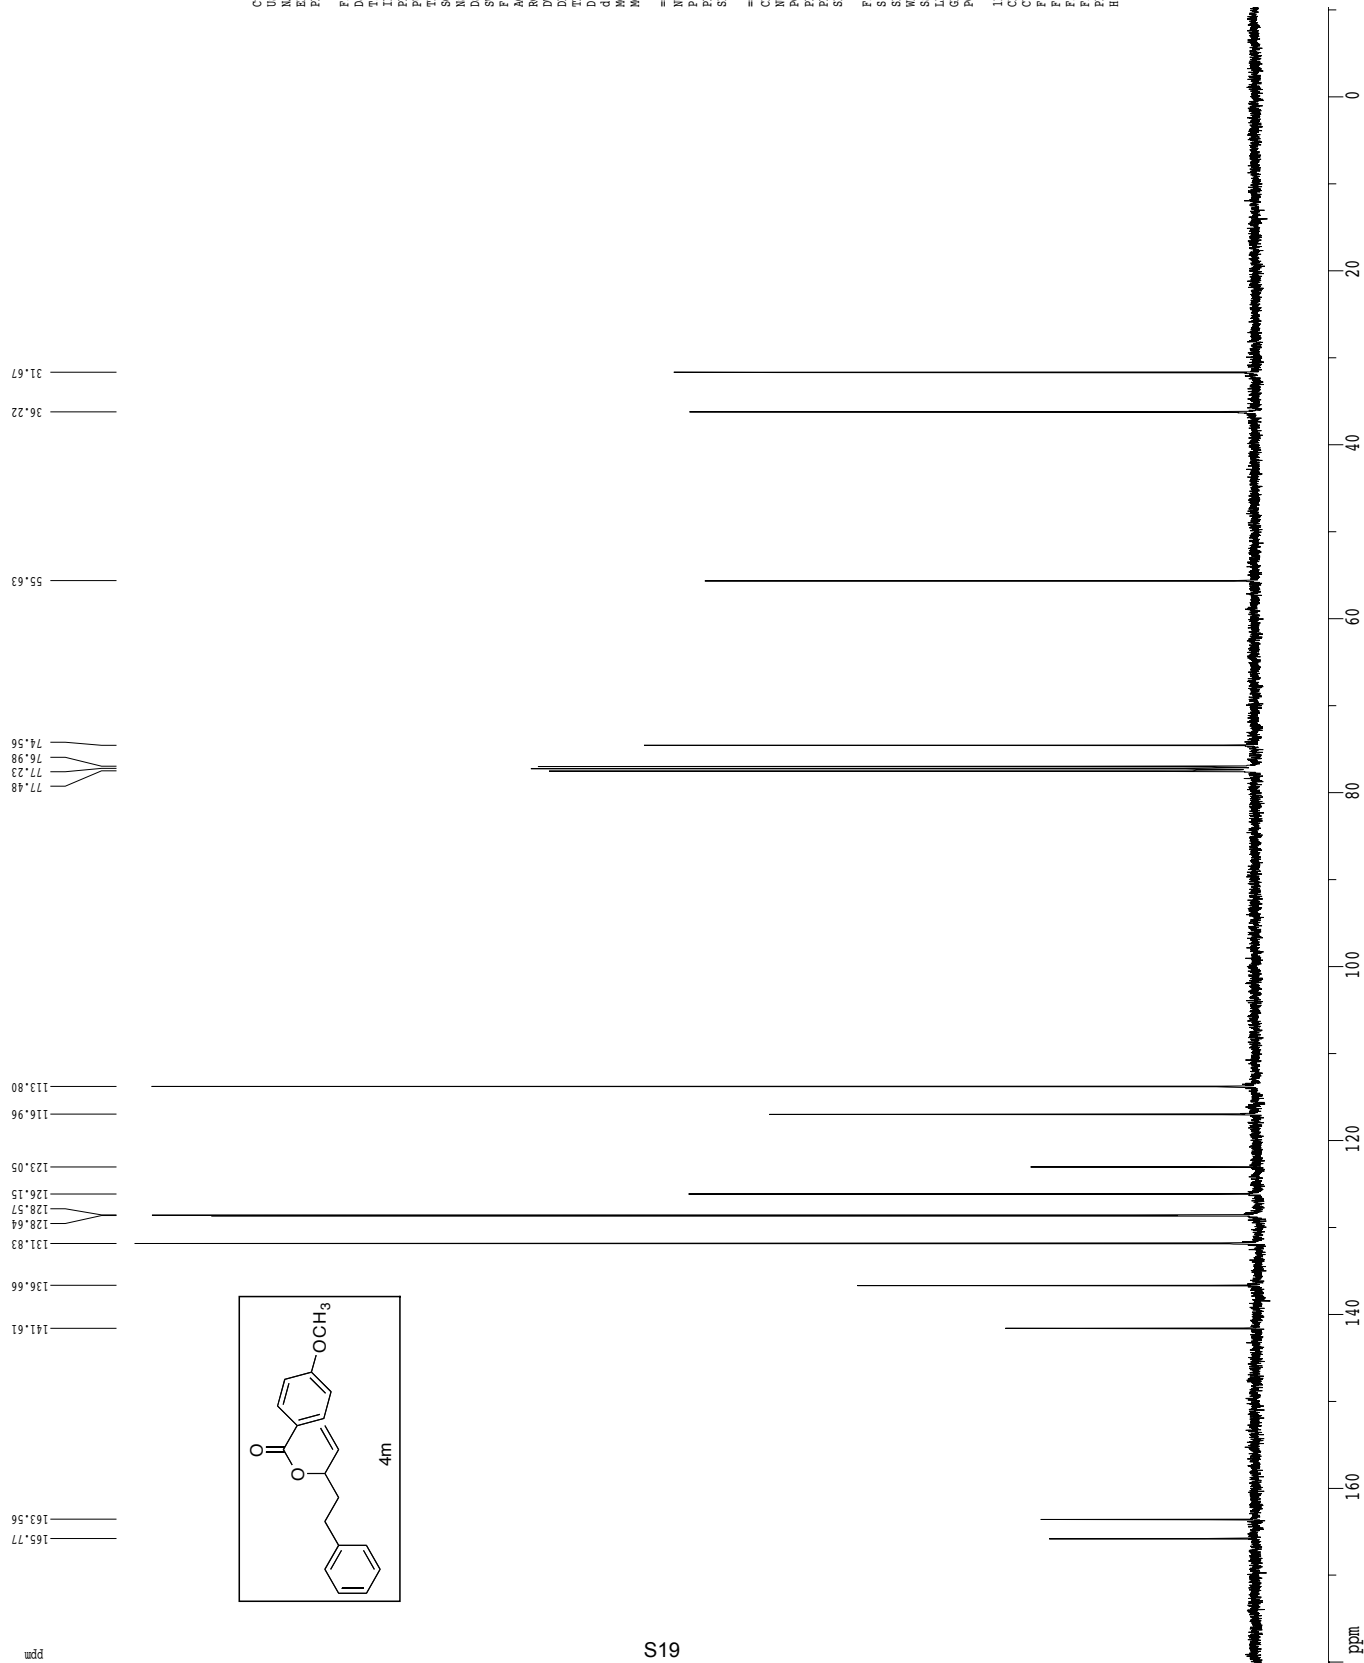

```

Current Data Parameters
USER          cannon
NAME          JSC1100
EXPNO         5
PROCNO        1

F2 - Acquisition Parameters
Date_         20080807
Time          18.31
INSTRUM       cryo500
PROBHD        5 mm CPYCI 1H-
PULPROG       zgpg30
TD            65418
SOLVENT       CDCl3
NS            160
DS            4
SWH           30303.031 Hz
FIDRES       0.463222 Hz
AQ           1.008777 sec
RG           6185.2
DN           16.500 usec
DE           6.00 usec
TE           298.0 K
D1           0.25000000 sec
d11          0.03000000 sec
MCREST       0.00000000 sec
MCWPRK       0.01500000 sec

===== CHANNEL f1 =====
NUC1          13C
P1           14.75 usec
PL1          -1.00 dB
SFO1         125.7942548 MHz

===== CHANNEL F2 =====
CPDPRG2      waltz16
NUC2          1H
PCPD2        100.00 usec
PL2          1.60 dB
PL12         21.00 dB
SFO2         500.2223011 MHz

F2 - Processing parameters
SI           65536
WDW          EM
SSB          0
LB           1.00 Hz
GB           0
PC           2.00

1D NMR plot parameters
CX           72.80 cm
CY           15.65 cm
F1P          180.000 ppm
F1           22640.47 Hz
F2P          -10.332 ppm
F2           -1299.59 Hz
PPMCM        8.34791 ppm/cm
HZCM         1050.00305 Hz/cm
    
```

**<sup>1</sup>H spectrum**

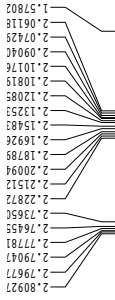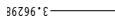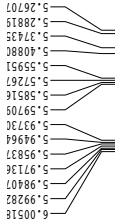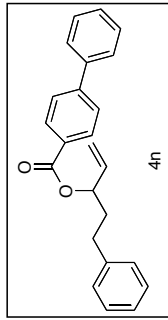

Current Data Parameters  
 USER camcon  
 NAME JSC104--2  
 EXPNO 1  
 PROCNO 1

F2 - Acquisition Parameters  
 Date\_ 20081013  
 Time 11:17  
 INSTRUM crys500  
 PROBD 5 mm CPCL IH-  
 PULPROG zg30  
 TD 81728  
 SOLVENT CDCl3  
 NS 6  
 DS 2  
 SH 8012.820 Hz  
 FIDRES 0.098043 Hz  
 AQ 5.0998774 sec  
 RG 5  
 DW 62.400 usec  
 DE 6.00 usec  
 TE 298.0 K  
 D 0.1000000 sec  
 ACQST 0.0000000 sec  
 MCORR 0.0150000 sec

==== CHANNEL f1 =====  
 NUC1 1H  
 P1 7.50 usec  
 PL1 1.60 dB  
 SFO1 500.2235015 MHz

F2 - Processing Parameters  
 SI 65536  
 SF 500.220265 MHz  
 WDW EM  
 SSB 0  
 LB 0.30 Hz  
 GB 0  
 PC 4.00

1D NMR plot parameters  
 CX 22.80 cm  
 CY 15.00 cm  
 FIP 9.000 ppm  
 F1 4501.98 Hz  
 F2 -1.062 ppm  
 F2 -531.32 Hz  
 PPMCN 0.44132 Epm/cm  
 HZCN 220.75900 Hz/cm

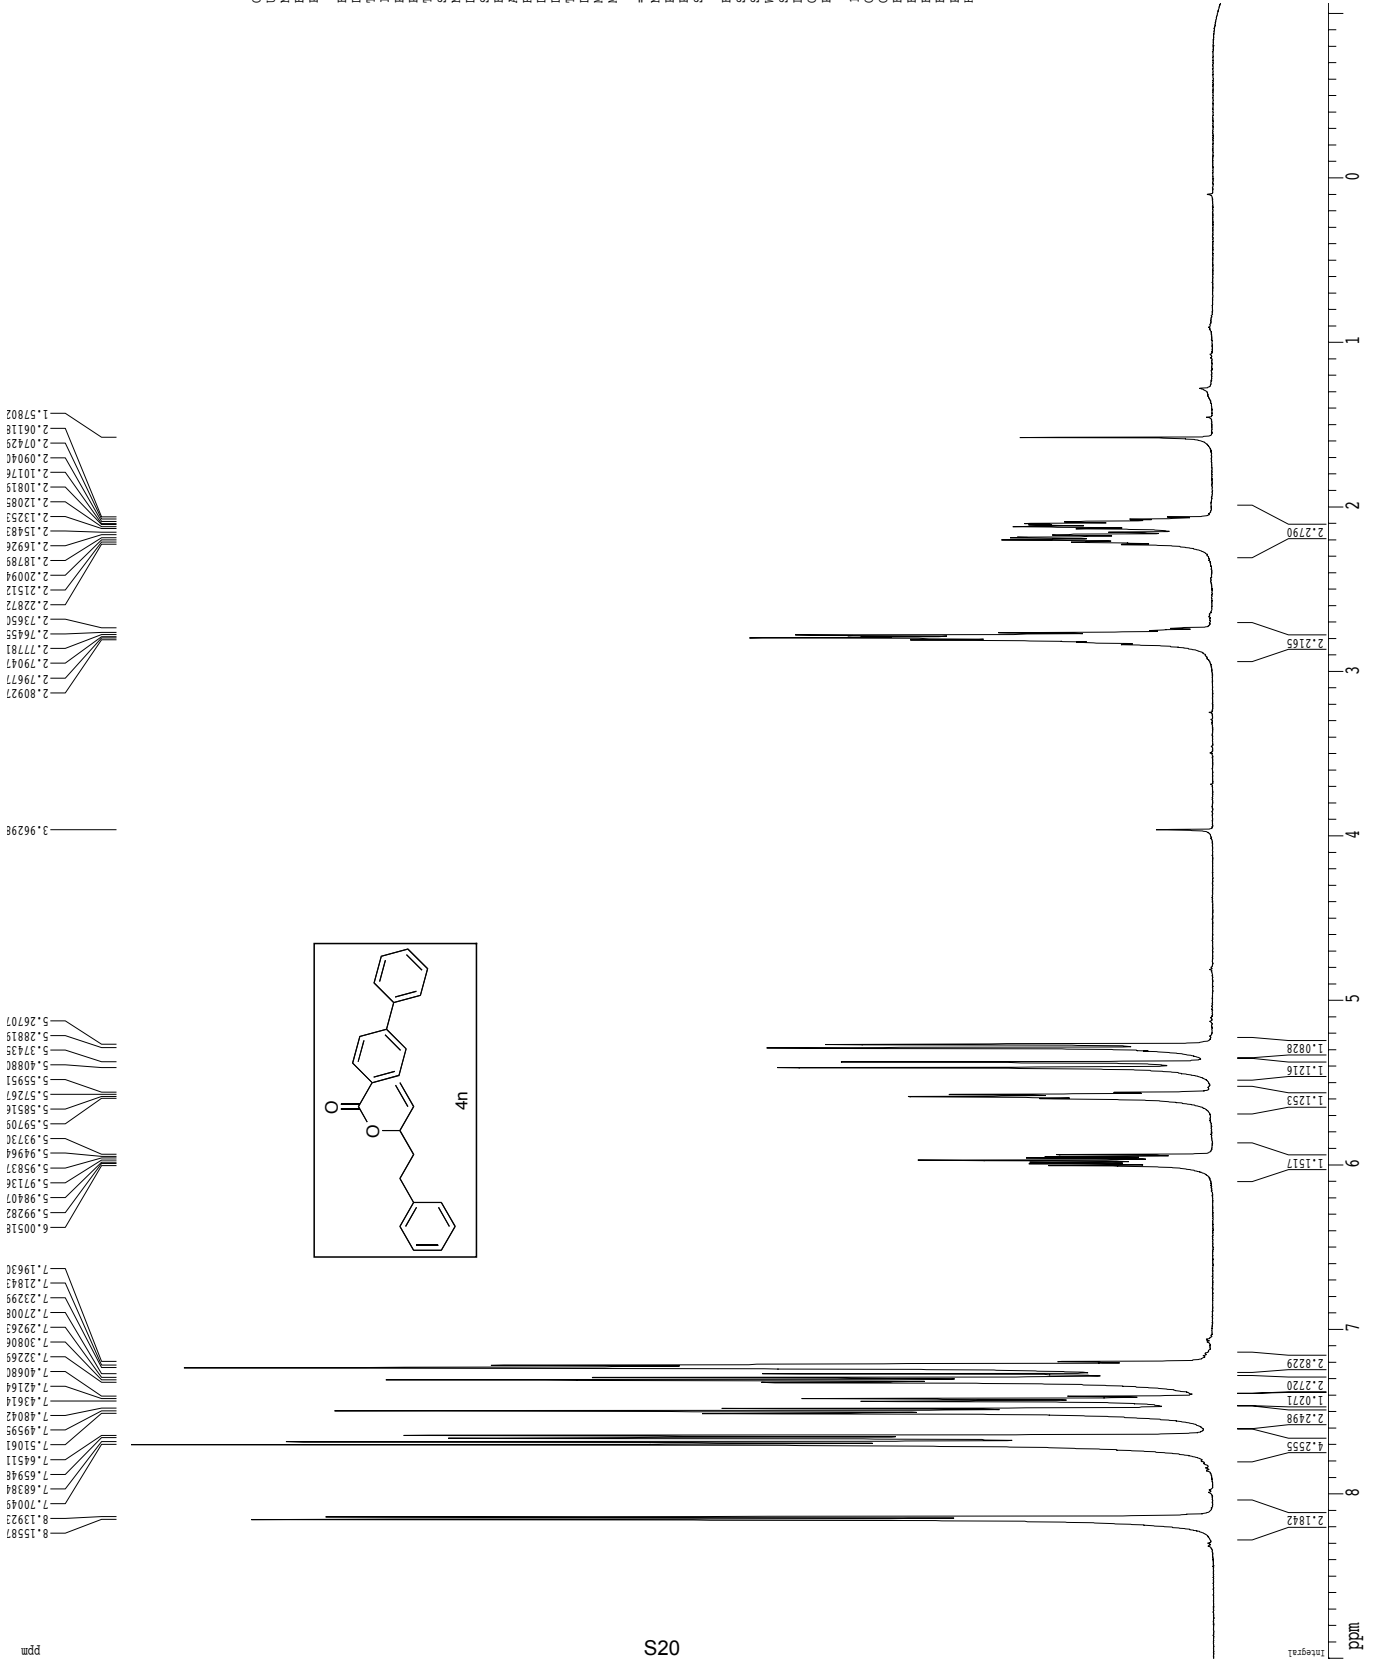



<sup>1</sup>H spectrum

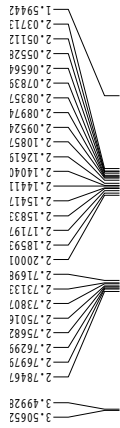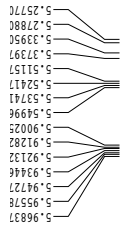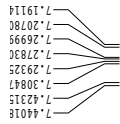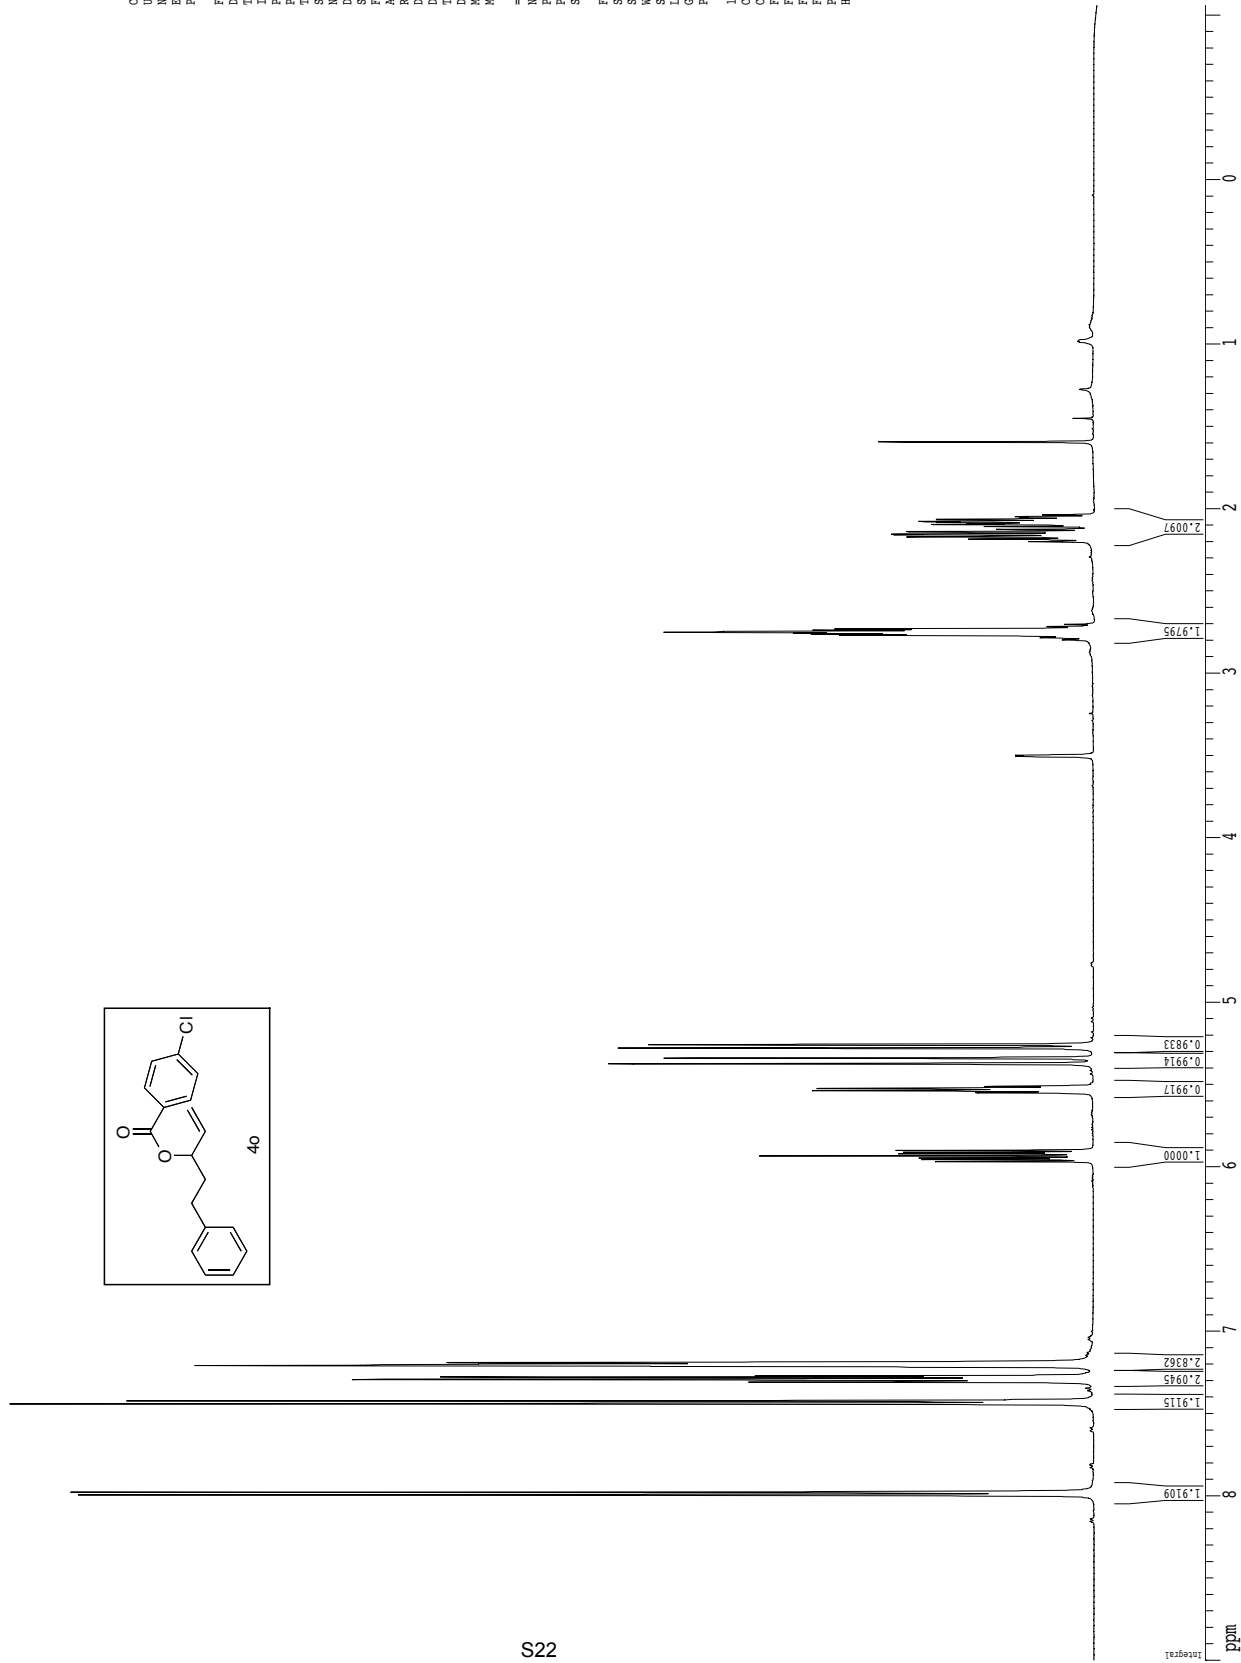

Current Data Parameters  
 USER cannon  
 NAME JSC1097-1  
 EXPNO 2  
 PROCNO 1

F2 - Acquisition Parameters  
 Date\_ 20081008  
 Time 15.49  
 INSTRUM crys500  
 PROBD 5 mm CPCL H-  
 PULPROG zg30  
 TD 81728  
 SOLVENT CDCl3  
 NS 6  
 SH 8012.820 Hz  
 FIDRES 0.098043 Hz  
 AQ 5.0998774 sec  
 RG 8  
 DW 62.400 usec  
 DE 6.00 usec  
 TE 298.0 K  
 0.1000000 sec  
 ACQST 0.0000000 sec  
 MCORR 0.01500000 sec

==== CHANNEL f1 =====  
 NUC1 1H  
 P1 7.50 usec  
 PL1 1.60 dB  
 SFO1 500.2235015 MHz

F2 - Processing Parameters  
 SI 65536  
 SF 500.2200257 MHz  
 WDM EM  
 SSB 0  
 LB 0.30 Hz  
 GB 0  
 PC 4.00

1D NMR plot parameters  
 CX 22.80 cm  
 CY 15.00 cm  
 FIP 9.000 ppm  
 F1 4501.98 Hz  
 F2P -1.061 ppm  
 F2 -530.60 Hz  
 PPMCH 0.44126 ppm/cm  
 HZCX 220.72697 Hz/cm

Z-restored spin-echo 13C spectrum with 1H decoupling

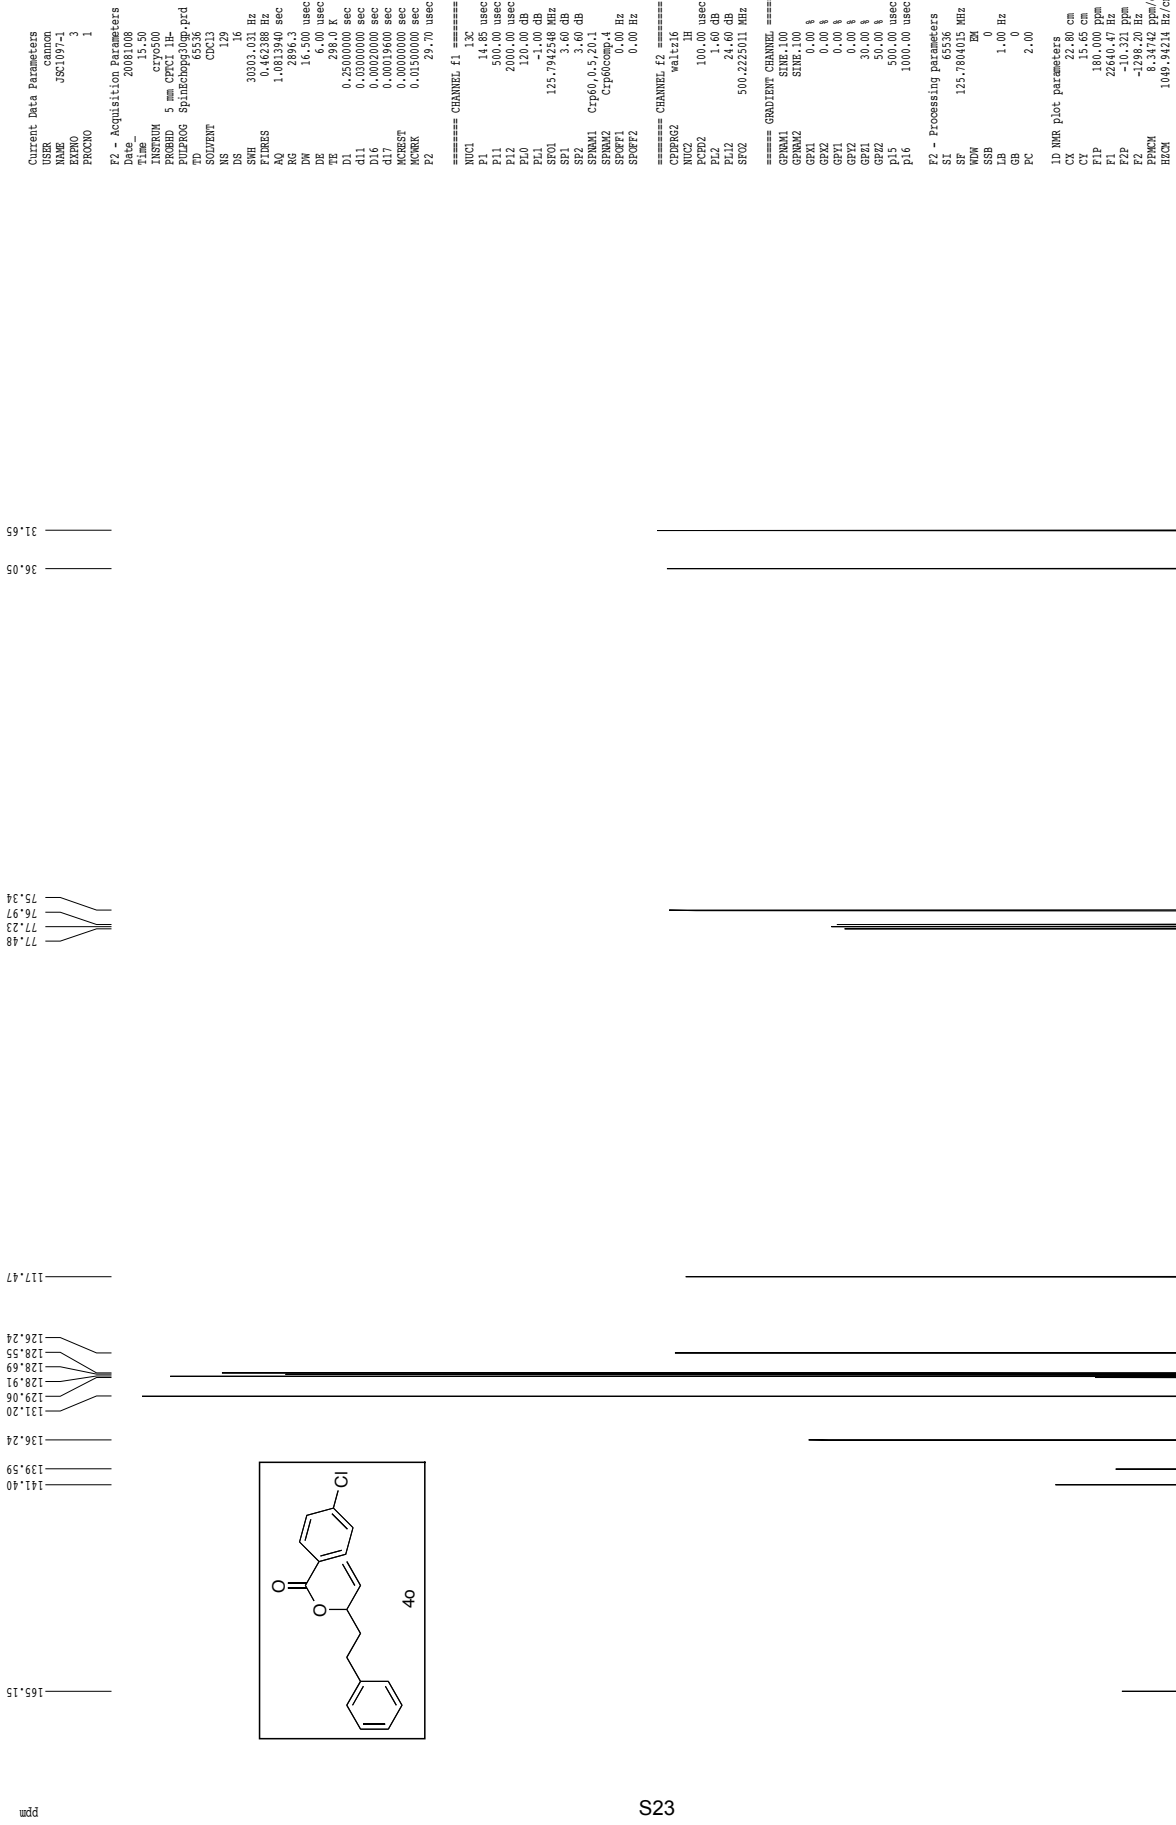

**<sup>1</sup>H spectrum**

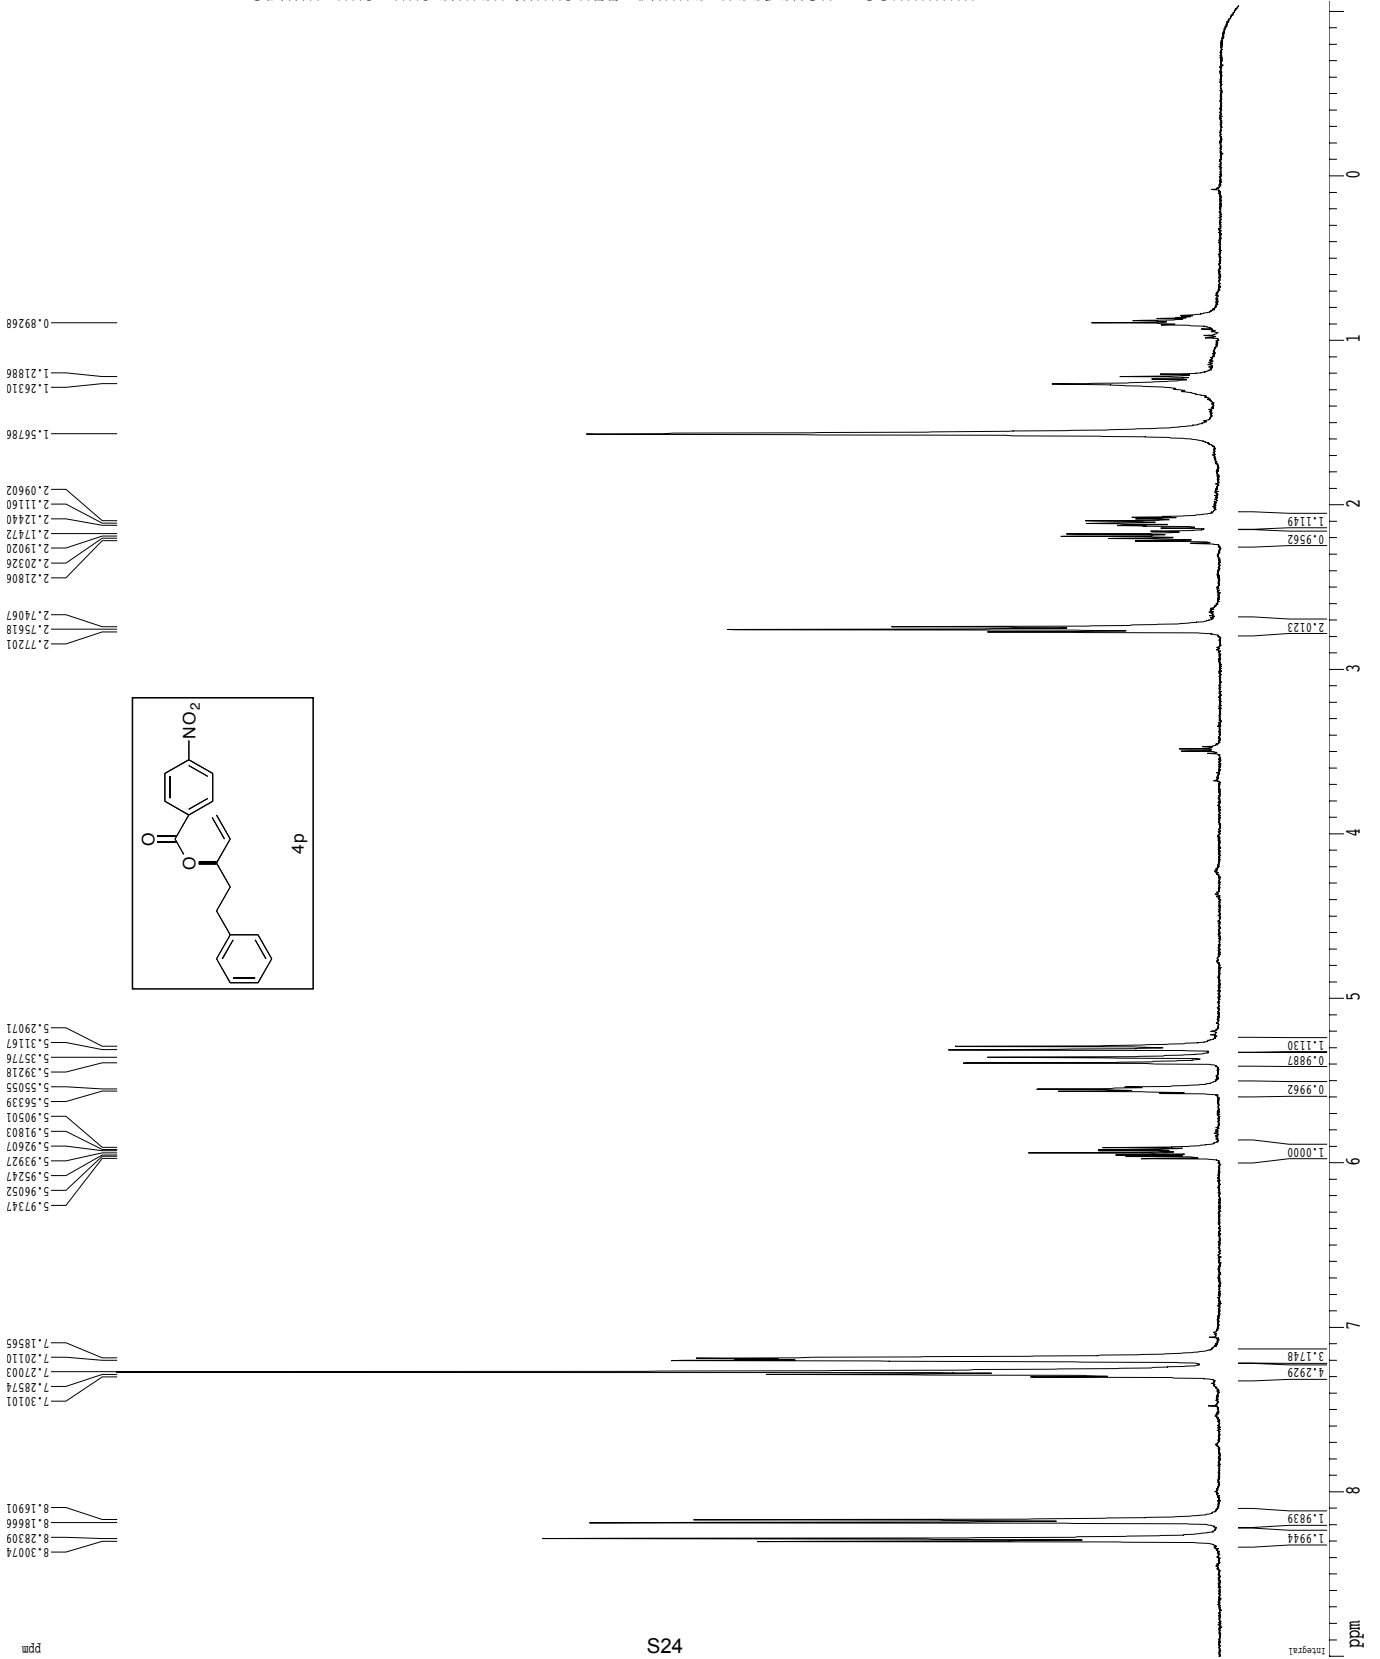

Current Data Parameters  
 USER cannon  
 NAME JSC2279-3  
 EXPNO 1  
 PROCNO 1

F2 - Acquisition Parameters  
 Date\_ 20100428  
 Time 15.34  
 INSTRUM crys500  
 PROBHD 5 mm CPCL1H-  
 PULPROG zg30  
 TD 81728  
 SOLVENT CDCl3  
 NS 2  
 DS 2  
 SWH 8012.820 Hz  
 FIDRES 0.098043 Hz  
 AQ 5.099398 sec  
 RG 8  
 DW 62.400 usec  
 DE 6.00 usec  
 TE 300.2 K  
 D1 0.1000000 sec  
 ACQRES 0.0000000 sec  
 MCNTRK 0.01500000 sec

==== CHANNEL f1 =====  
 NUC1 1H  
 P1 7.50 usec  
 PL1 1.60 dB  
 SFO1 500.2235015 MHz

F2 - Processing Parameters  
 SI 65536  
 SF 500.2200267 MHz  
 WDM EM  
 SSB 0  
 LB 0.30 Hz  
 GB 0  
 PC 4.00

1D NMR plot parameters  
 CX 22.80 cm  
 CY 30.00 cm  
 FIP 9.000 ppm  
 F1 4501.98 Hz  
 F2 -1.063 ppm  
 FZ -531.57 Hz  
 PRCK 0.44335 ppm/cm  
 RZCK 220.76974 Hz/cm



Z-restored spin-echo 13C spectrum with 1H decoupling

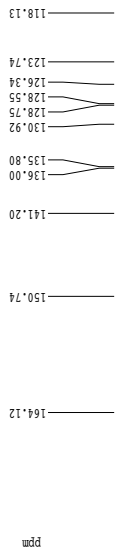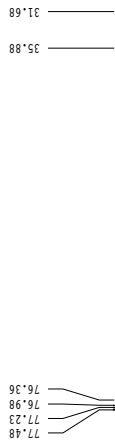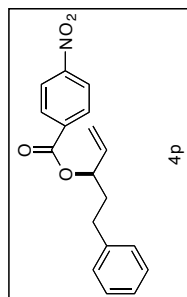

Current Data Parameters  
 USER canon  
 NAME JSC279-3  
 EXNO 2  
 PROCNO 1

F2 - Acquisition Parameters  
 Date 20100428  
 Time 15:37  
 INSTRUM cryo500  
 PROBDH 5 mm CPYCI 1H-  
 PULPROG Sp1hchgprp-pd  
 PRGNAME sp1hchgprp  
 SOLVENT CDCl3  
 NS 504  
 DS 16  
 SRH 30303.031 Hz  
 FIDRES 0.462388 Hz  
 AQ 1.0613940 sec  
 RG 4096  
 DW 16.500 usec  
 DE 6.00 usec  
 TE 298.0 K  
 D1 0.25000000 sec  
 d11 0.03000000 sec  
 P16 0.00020000 sec  
 P17 0.00020000 sec  
 P18 0.00020000 sec  
 MCREST 0.00000000 sec  
 MCMRK 0.01500000 sec  
 P2 31.00 usec

\*\*\*\*\* CHANNEL f1 \*\*\*\*\*  
 NUC1 13C  
 P1 15.15 usec  
 PL1 500.00 usec  
 P12 2000.00 usec  
 PL2 120.00 dB  
 PL1 -1.00 dB  
 SFO1 125.7642548 MHz  
 SFO2 50.0000000 MHz  
 SF1 3.70000000 dB  
 SF2 3.70000000 dB  
 SPNM1 Cpf60.0.5.20.1  
 SPNM2 Cpf60comp.4  
 SPOFF1 0.00 Hz  
 SPOFF2 0.00 Hz

\*\*\*\*\* CHANNEL f2 \*\*\*\*\*  
 CPMRG2 waltz16  
 NUC2 1H  
 P2 100.00 usec  
 PL2 1.60 dB  
 PL12 24.60 dB  
 SFO2 500.2225011 MHz

\*\*\*\*\* GRADIENT CHANNEL \*\*\*\*\*  
 GPMN1 SINE.100  
 GPMN2 SINE.100  
 GPX1 0.00 %  
 GPX2 0.00 %  
 GFI1 0.00 %  
 GFI2 0.00 %  
 GZ1 30.00 %  
 GZ2 30.00 %  
 GZ3 50.00 %  
 p15 500.00 usec  
 p16 1000.00 usec

F2 - Processing parameters  
 SI 65536  
 SF 125.7603888 MHz  
 WDM EM  
 SSB 0  
 LB 1.00 Hz  
 GB 0  
 PC 1.00

1D NMR plot parameters  
 CX 22.80 cm  
 CY 31.00 cm  
 FIP 180.000 ppm  
 F1 22840.47 Hz  
 F2 11420.235 Hz  
 P1 180.000 ppm  
 P2 -115.67 Hz  
 PFCM 8.35351 ppm/cm  
 HCM 1090.70789 Hz/cm

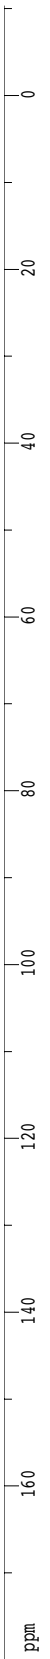

1H spectrum

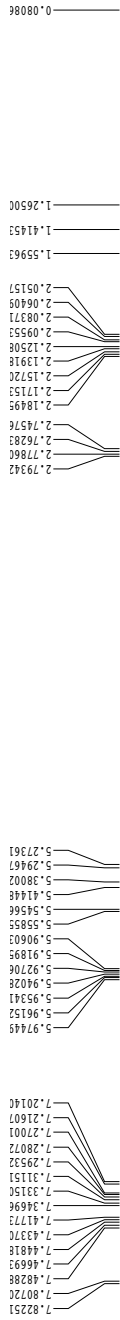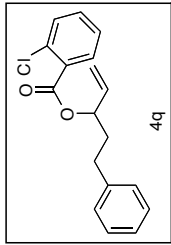

Current Data Parameters  
 USER camcon  
 NAME JSC1104-2  
 EXPNO 1  
 PROCNO 1  
 F2 - Acquisition Parameters  
 Date\_ 20081020  
 Time 15.30  
 INSTRUM crys500  
 PROBD 5 mm CPCL1H-  
 PULPROG zg30  
 TD 81728  
 SOLVENT CDCl3  
 NS 6  
 DS 2  
 SH 8012.820 Hz  
 SF 0.098043 Hz  
 FIDRES 5.0998774 sec  
 AQ 5  
 RG 62.400 usec  
 DE 6.00 usec  
 TE 298.0 K  
 W 0.1000000 sec  
 SFO1 500.2235015 MHz  
 ACQRES 0.0150000 sec  
 MCNCR 0.0150000 sec  
 ===== CHANNEL f1 =====  
 NUC1 1H  
 P1 7.50 usec  
 PL1 1.60 dB  
 SFO1 500.2235015 MHz  
 F2 - Processing Parameters  
 SI 65536  
 SF 500.2200263 MHz  
 WDM EM  
 SSB 0  
 LB 0.30 Hz  
 GB 0  
 PC 4.00  
 ID NMR plot parameters  
 CX 22.80 cm  
 CY 15.00 cm  
 FIP 9.000 ppm  
 F1 4501.98 Hz  
 F2P -1.062 ppm  
 F2 -531.21 Hz  
 PPMCN 0.44131 ppm/cm  
 HZCN 220.75375 Hz/cm

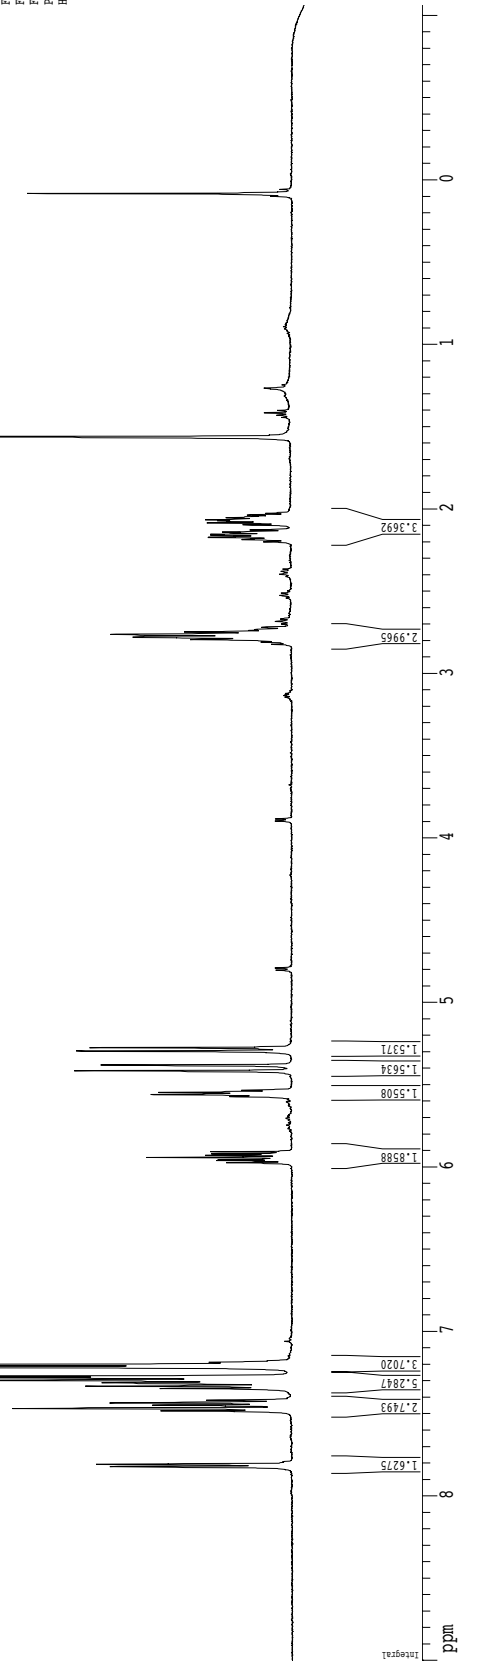



1H spectrum

ppm

1.61210  
1.71551  
1.74651  
1.77627  
1.90154  
1.91831  
1.95128  
1.97264  
1.97264  
1.98005  
1.98450  
1.99864  
2.04821  
2.63216  
2.64605  
2.65290  
2.66468  
2.67117  
2.68394  
2.69535

5.17070  
5.19190  
5.23925  
5.27385  
5.29258  
5.30475  
5.79435  
5.80609  
5.81554  
5.82773  
5.84056  
5.84993  
5.86174

7.17821  
7.19293  
7.20377  
7.21851  
7.26997  
7.28466  
7.29865  
7.31455

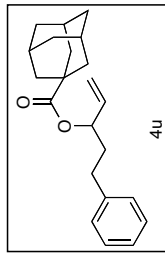

Current Data Parameters  
 USER camcon  
 NAME JSC1099-2  
 EXPNO 1  
 PROCNO 1  
 F2 - Acquisition Parameters  
 Date\_ 20081015  
 Time 14:57  
 INSTRUM crys500  
 PROHD 5 mm CPCL1 H-  
 PULPROG zg30  
 TD 81728  
 SOLVENT CDCl3  
 NS 6  
 DS 2  
 SH 8012.820 Hz  
 FIDRES 0.098043 Hz  
 AQ 5.0998774 sec  
 RG 4  
 DW 62.400 usec  
 DE 6.00 usec  
 TE 298.0 K  
 0.1000000 sec  
 ACQST 0.0000000 sec  
 MCNCR 0.01500000 sec  
 ===== CHANNEL f1 =====  
 NUC1 1H  
 P1 7.50 usec  
 PL1 1.60 dB  
 SFO1 500.2235015 MHz  
 F2 - Processing Parameters  
 SI 65536  
 SF 500.2200272 MHz  
 WDM EM  
 SSB 0  
 LB 0.30 Hz  
 GB 0  
 PC 4.00  
 1D NMR plot parameters  
 CX 22.80 cm  
 CY 15.00 cm  
 FIP 9.000 ppm  
 F1 4501.98 Hz  
 F2P -1.064 ppm  
 F2 -532.06 Hz  
 PPMCN 0.44139 ppm/cm  
 HZCN 220.79128 Hz/cm

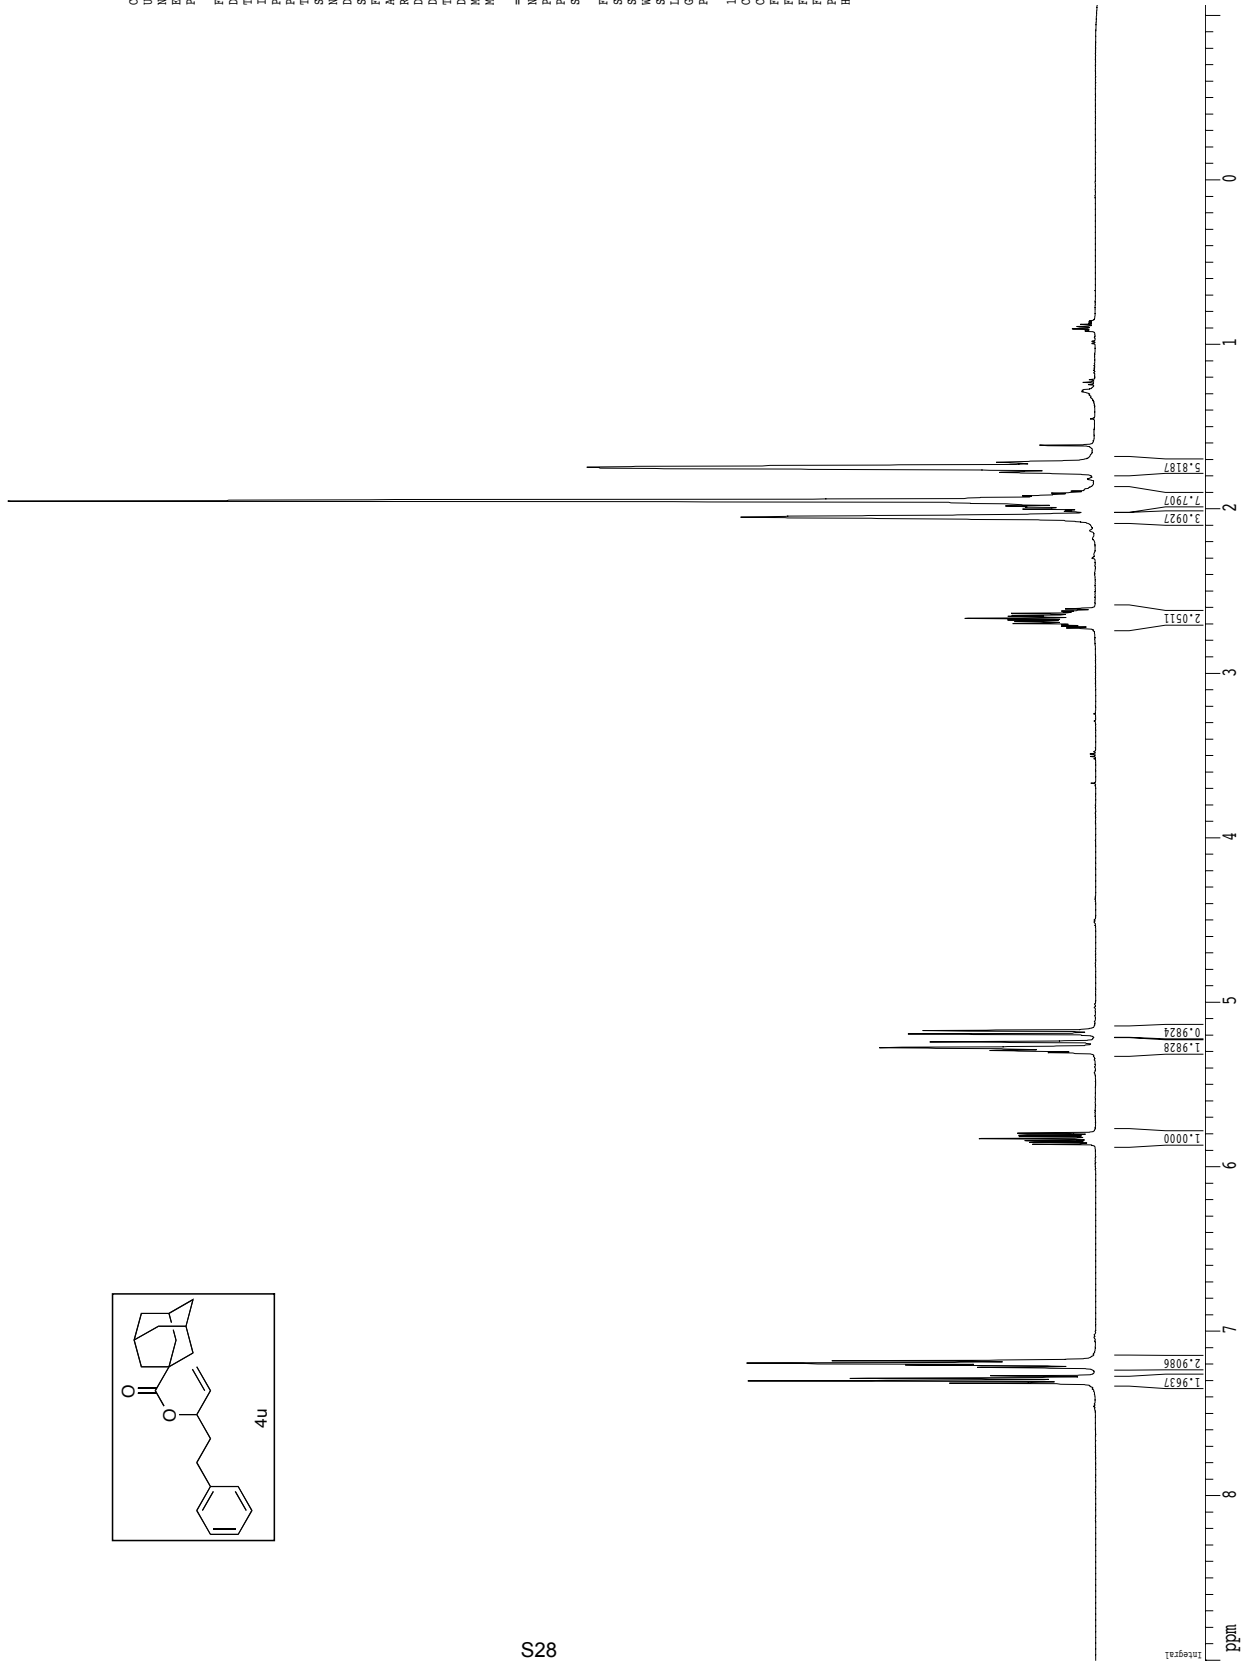

Z-restored spin-echo 13C spectrum with 1H decoupling

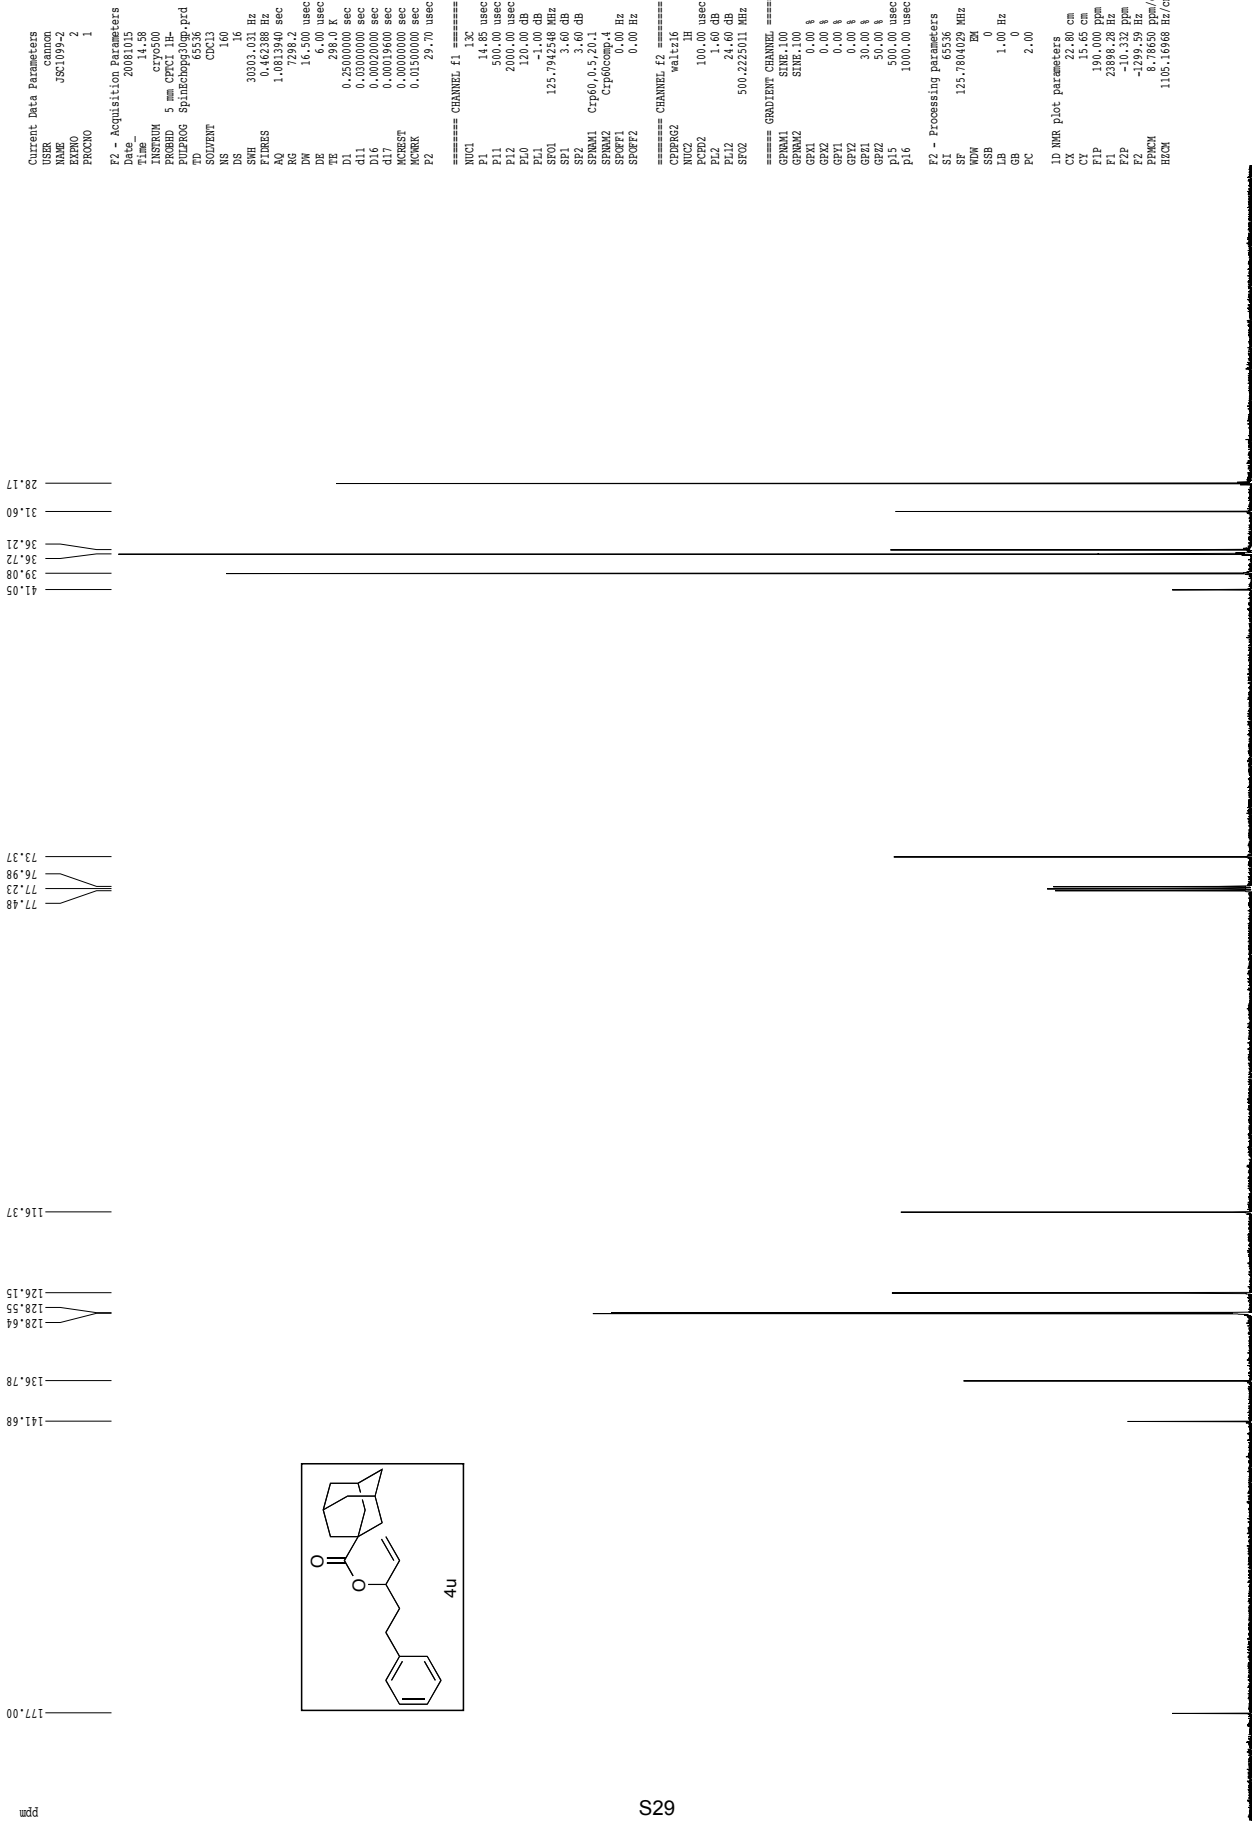

<sup>1</sup>H spectrum

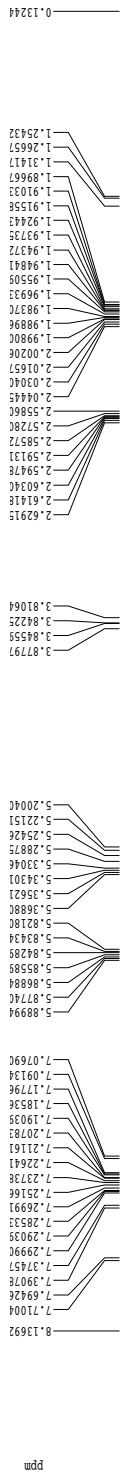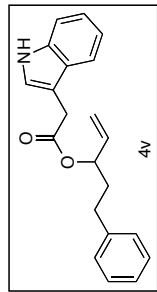

Current Data Parameters  
 USER camcon  
 NAME JSC058  
 EXPNO 5  
 PROCNO 1

F2 - Acquisition Parameters  
 Date\_ 20081003  
 Time 15.41  
 INSTRUM crys500  
 PROBD 5 mm CPCL IH-  
 PULPROG zg30  
 TD 81728  
 SOLVENT CDCl3  
 NS 6  
 DS 2  
 SFO1 8012.820 Hz  
 FIDRES 0.098043 Hz  
 AQ 5.098774 sec  
 RG 16  
 DW 62.400 usec  
 DE 6.00 usec  
 TE 298.0 K  
 0.1000000 sec  
 ACQST 0.0300000 sec  
 ACSTRT 0.0350000 sec  
 ACENK 0.0350000 sec

==== CHANNEL f1 =====  
 NUC1 1H  
 P1 7.38 usec  
 PL1 1.60 dB  
 SFO1 500.2235015 MHz

F2 - Processing Parameters  
 SI 65536  
 SF 500.220153 MHz  
 WDM EM  
 SSB 0  
 LB 0.30 Hz  
 GB 0  
 PC 4.00

1D NMR plot parameters  
 CX 22.80 cm  
 CY 15.00 cm  
 FIP 9.000 ppm  
 F1 4501.98 Hz  
 F2F -1.040 ppm  
 F2 -520.20 Hz  
 PPMCN 0.44035 ppm/cm  
 HZCN 220.27109 Hz/cm

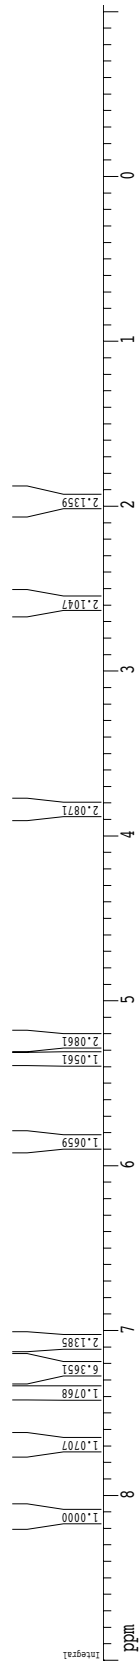

13C spectrum with 1H decoupling

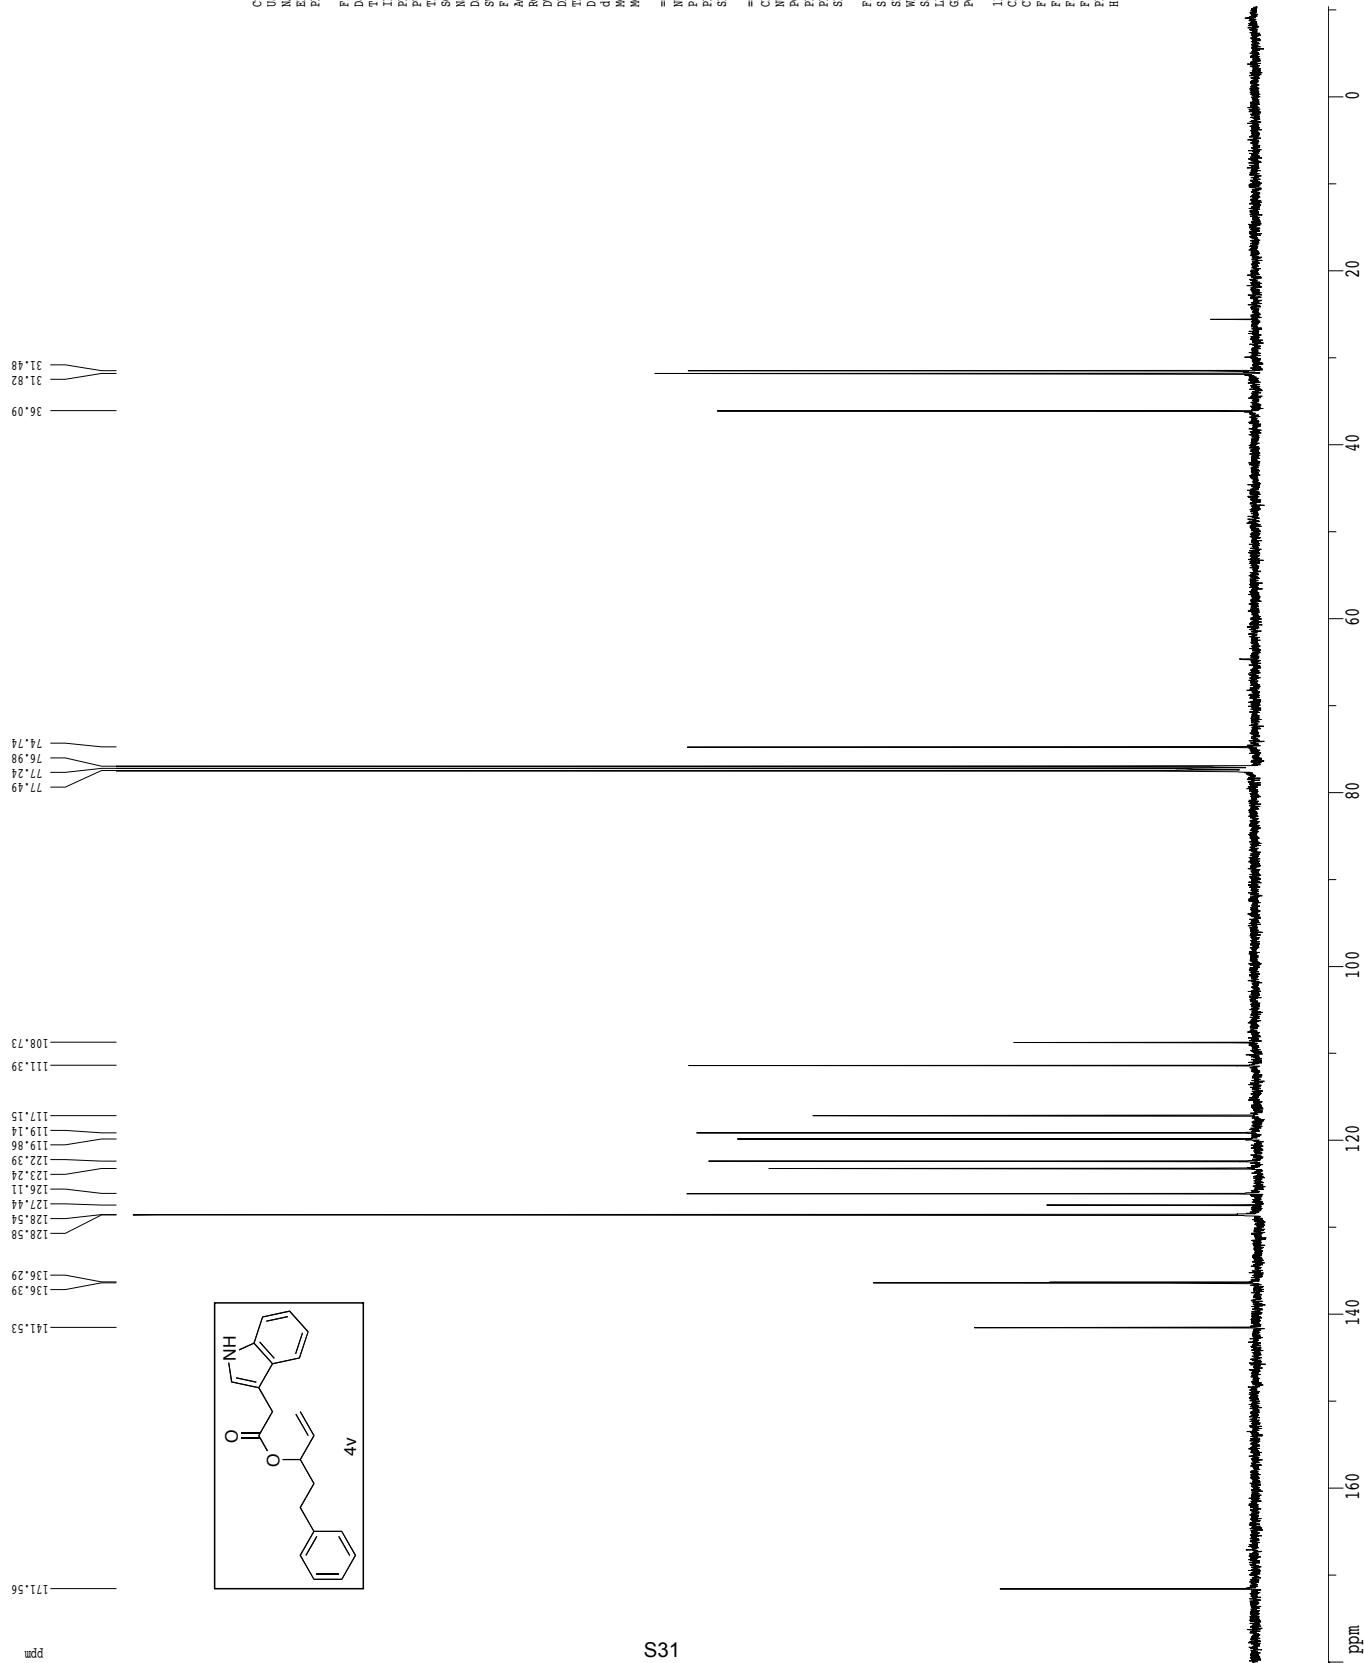

Current Data Parameters  
 USER cannon  
 NAME JSC1058  
 EXPNO 6  
 PROCNO 1

F2 - Acquisition Parameters  
 Date\_ 20080303  
 Time 15:30  
 INSTRUM cty6500  
 PROBHD 5 mm CPYCI 1H-  
 PULPROG zgpg30  
 TD 65418  
 SOLVENT CDCl3  
 NS 160  
 DS 4  
 SWH 30303.031 Hz  
 FIDRES 0.463222 Hz  
 AQ 1.0793812 sec  
 RG 8192  
 KW 16.500 usec  
 DE 6.00 usec  
 TE 298.0 K  
 D1 0.25000000 sec  
 d11 0.03000000 sec  
 MCREST 0.00000000 sec  
 MCWPRK 0.01500000 sec

==== CHANNEL f1 13C  
 NU1C1 14.75 usec  
 PL1 -1.00 dB  
 SF01 125.7942548 MHz

==== CHANNEL F2 =====  
 CPDPRG2 waltz16  
 NU1C2 1H  
 PCPD2 100.00 usec  
 PL2 1.00 dB  
 PL12 21.00 dB  
 SF02 500.2223011 MHz

F2 - Processing Parameters  
 SI 65536  
 SF 125.7804043 MHz  
 WDW EM  
 SSB 0  
 LB 1.00 Hz  
 GB 0  
 PC 2.00

1D NMR plot parameters  
 CX 72.80 cm  
 CY 15.65 cm  
 F1P 180.000 ppm  
 F1 22640.47 Hz  
 F2P -10.343 ppm  
 F2 -1300.99 Hz  
 PPMCN 8.34839 ppm/cm  
 HZCN 1050.06409 Hz/cm

1H spectrum

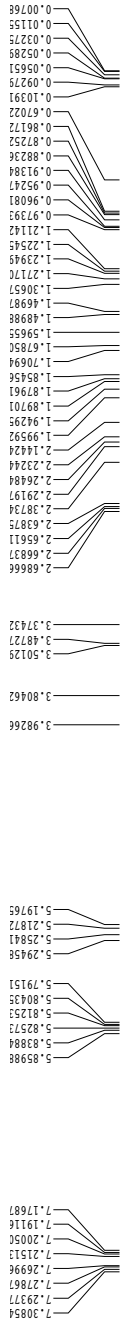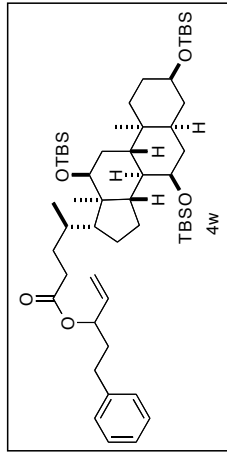

Current Data Parameters  
 USER camcon  
 NAME JSC113-2  
 EXPNO 1  
 PROCNO 1

F2 - Acquisition Parameters  
 Date\_ 20081007  
 Time 15.31  
 INSTRUM crys500  
 PROHD 5 mm CPCL1 H-  
 PULPROG zg30  
 TD 81728  
 SOLVENT CDCl3  
 NS 6  
 DS 2  
 SFO1 8012.820 Hz  
 FIDRES 0.098043 Hz  
 AQ 5.0998774 sec  
 RG 3.2  
 DW 62.400 usec  
 DE 6.00 usec  
 TE 298.0 K  
 0.1000000 sec  
 ACQST 0.0000000 sec  
 MCORR 0.01500000 sec

==== CHANNEL f1 =====  
 NUCL1 1H  
 P1 7.50 usec  
 PL1 1.60 dB  
 SFO1 500.2235015 MHz

F2 - Processing Parameters  
 SI 65536  
 SF 500.2200258 MHz  
 WDM EM  
 SSB 0  
 LB 0.30 Hz  
 GB 0  
 PC 4.00

1D NMR plot parameters  
 CX 22.80 cm  
 CY 15.00 cm  
 FIP 9.000 ppm  
 F1 4501.98 Hz  
 F2 -1.061 ppm  
 F2 -530.71 Hz  
 PPMCH 0.44327 ppm/cm  
 HZCH 220.73225 Hz/cm

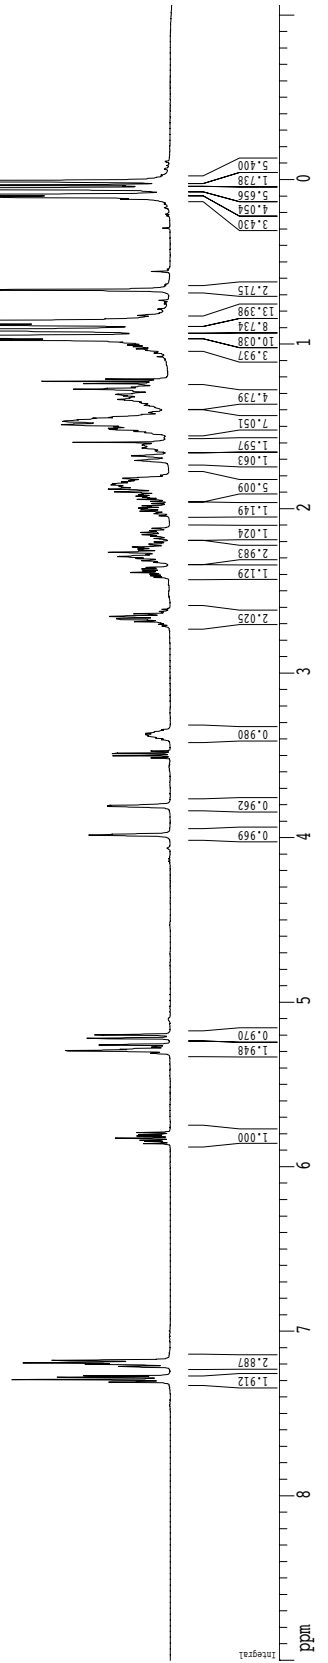





sk-ii-96  
 1H spectrum

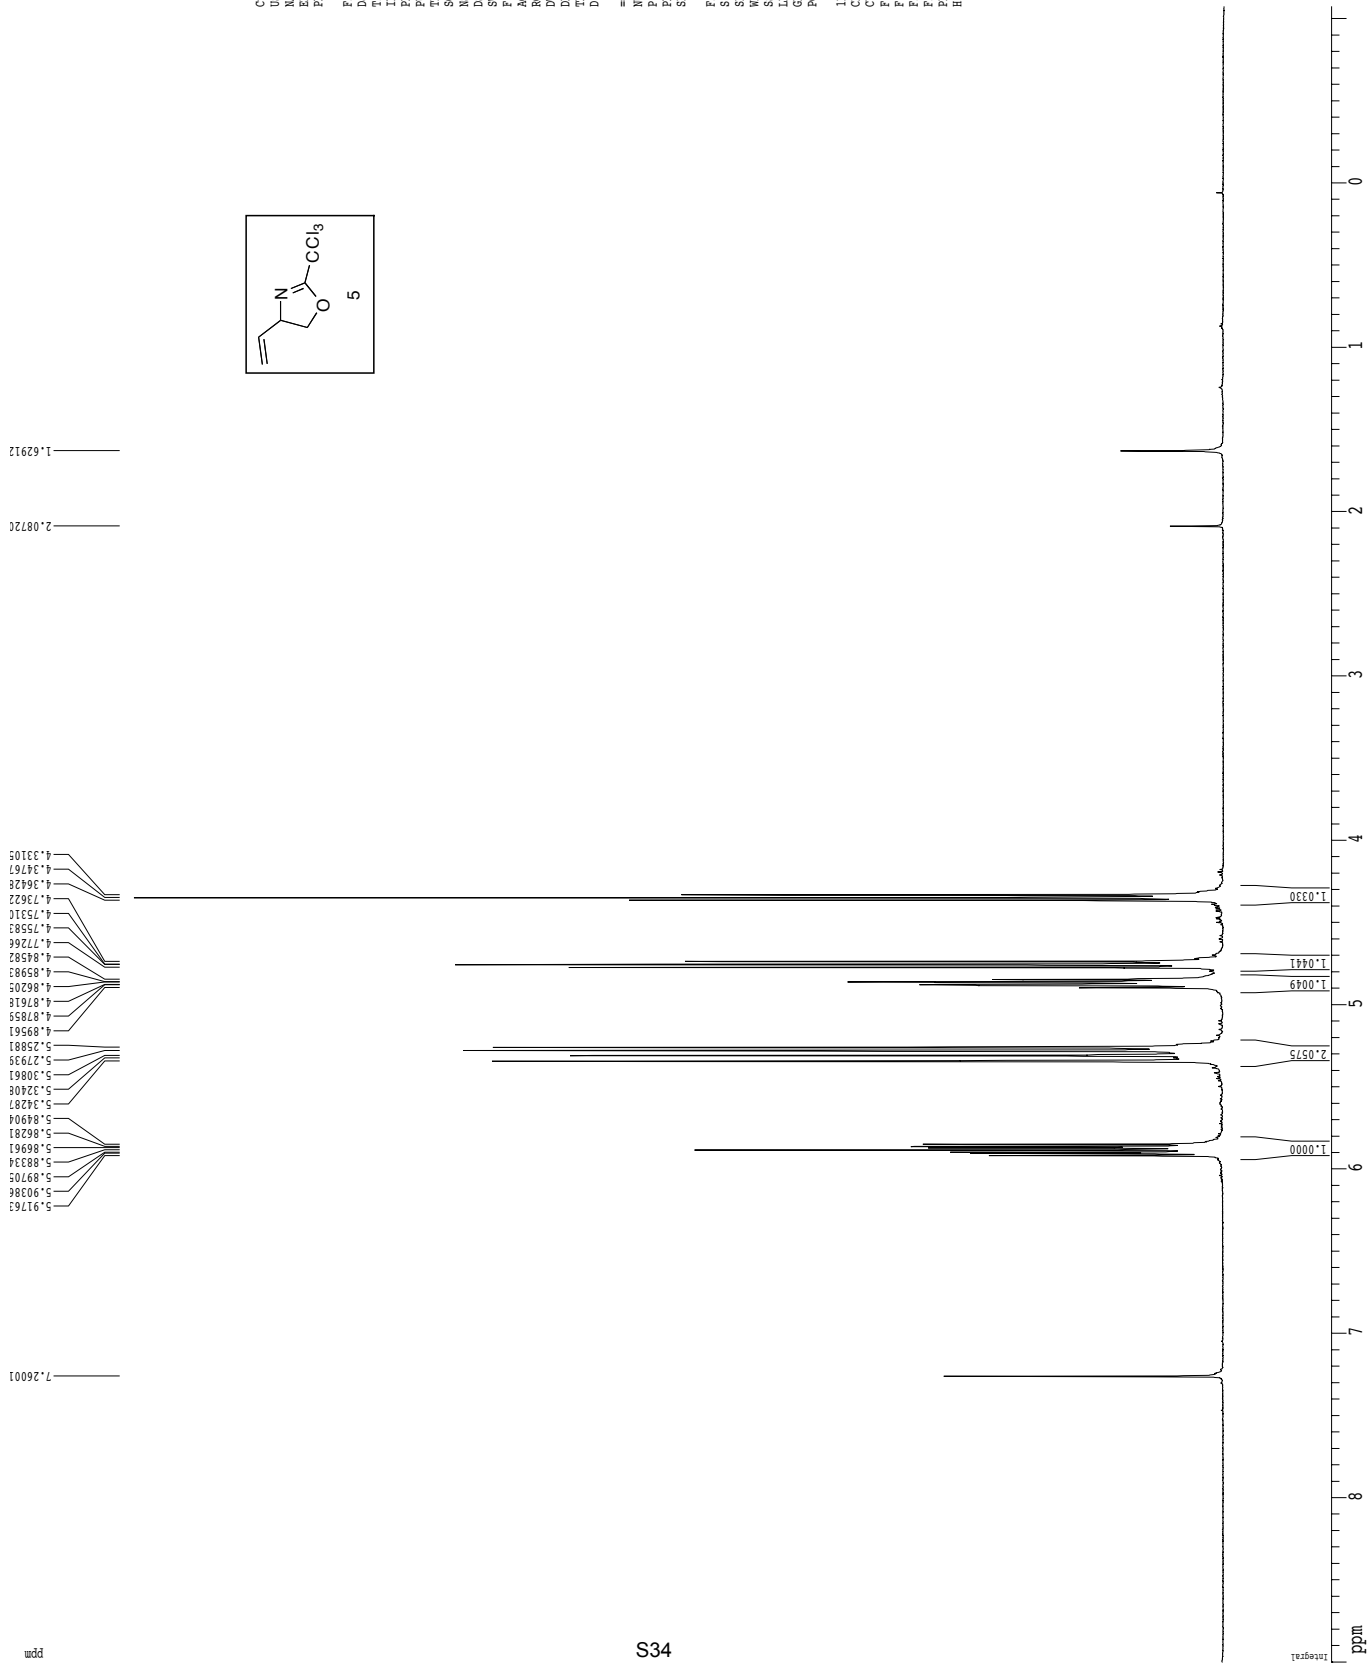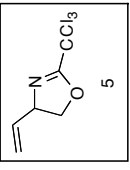

Current Data Parameters  
 USER cannon  
 NAME sk-ii-96  
 EXPNO 1  
 PROCNO 1

F2 - Acquisition Parameters  
 Date\_ 20041021  
 Time 8.38  
 INSTRUM omega500  
 PROBHD 5 mm broadband  
 PULPROG zg30  
 TD 81728  
 SOLVENT CDCl3  
 NS 9  
 DS 2  
 SFO1 8012.820 Hz  
 FIDRES 0.098043 Hz  
 AQ 5.0998774 sec  
 RG 256  
 DW 62.400 usec  
 DE 6.00 usec  
 TE 300.0 K  
 D1 0.1000000 sec

===== CHANNEL f1 =====  
 NUC1 1H  
 P1 13.00 usec  
 PL1 -1.00 dB  
 SFO1 500.2235015 MHz

F2 - Processing parameters  
 SI 65536  
 SF 500.2200312 MHz  
 EN  
 MDW 0  
 SSB 0  
 AB 0.30 Hz  
 GB 0  
 PC 4.00

ID NMR plot parameters  
 CX 22.80 cm  
 CY 15.00 cm  
 FIP 9.000 ppm  
 F1 4501.98 Hz  
 F2 -1.072 ppm  
 F3 536.08 Hz  
 GAMMA 0.4874 Hz/cm  
 HZCM 220.98704 Hz/cm

sk-ii-96  
 13C spectrum with 1H decoupling

ppm

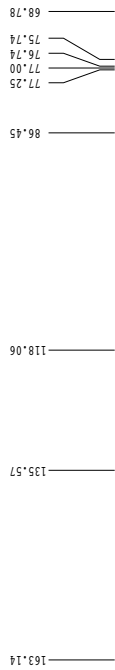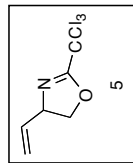

```

Current Data Parameters
USER          cannon
NAME          sk-ii-96
EXPNO        2
PROCNO       1

F2 - Acquisition Parameters
Date_         20041021
Time_         8.45
INSTRUM      omega500
PROBHD       5 mm broadband
PULPROG      zgpg30
TD            65536
SOLVENT      CDCl3
NS            828
DS            4
SFO1          30303.031 Hz
SF02          0.462388 Hz
FIDRES       1.0813940 sec
RG            5160.6
DW            16.500 usec
DE            4.50 usec
TE            300.0 K
D1            0.25000000 sec
D11           0.03000000 sec

===== CHANNEL f1 =====
NUC1          13C
P1            22.50 usec
PL1           -6.00 dB
SFO1          125.7942048 MHz

===== CHANNEL f2 =====
CPDPRG2      waltz16
NUC2          1H
P2            80.00 usec
PL2           1.00 dB
PL12          1.00 dB
PL13          1.00 dB
SFO2          500.2230013 MHz

F2 - Processing parameters
SI            65536
SF            125.7804290 MHz
WDW           EM
SSB           0
LB            1.00 Hz
GB            0
PC            2.00

ID NMR plot parameters
CX            22.80 cm
CY            15.65 cm
F1P           229.983 ppm
F1            28927.35 Hz
F2P           -10.937 ppm
F2            -1375.68 Hz
PPMCH         10.56667 ppm/cm
HZCH          1325.06032 Hz/cm
  
```

S35

ppm

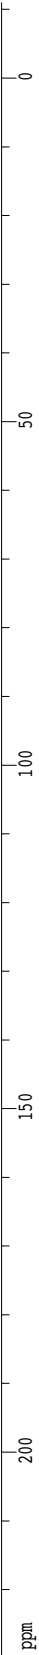

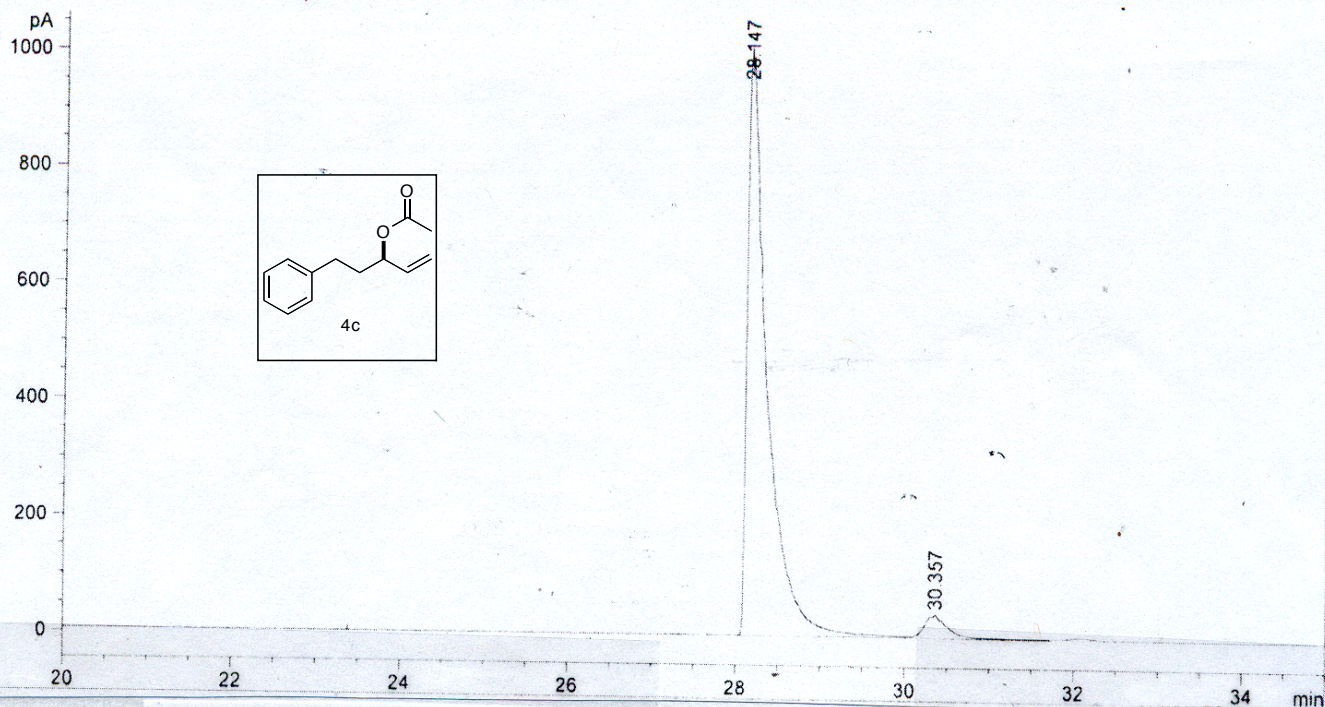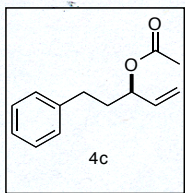

| Peak #   | RetTime [min] | Type | Width [min] | Area [pA*s] | Height [pA] | Area %   |
|----------|---------------|------|-------------|-------------|-------------|----------|
| 1        | 28.147        | VV   | 0.2239      | 1.64877e4   | 981.68097   | 95.40823 |
| 2        | 30.357        | VV   | 0.2817      | 793.51178   | 38.94912    | 4.59177  |
| Totals : |               |      |             | 1.72812e4   | 1020.63009  |          |

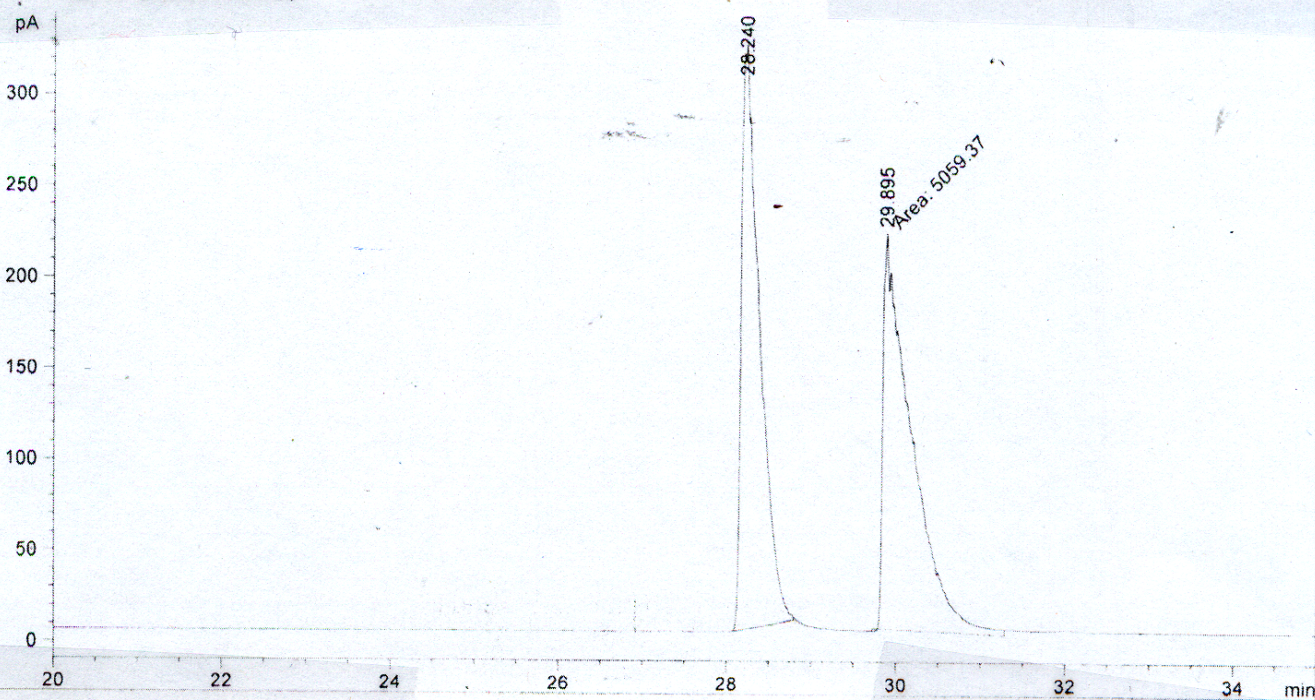

| Peak # | RetTime [min] | Type | Width [min] | Area [pA*s] | Height [pA] | Area %   |
|--------|---------------|------|-------------|-------------|-------------|----------|
| 1      | 28.240        | PB   | 0.1814      | 4834.20068  | 319.73407   | 48.86204 |
| 2      | 29.895        | MM   | 0.3882      | 5059.37109  | 217.20891   | 51.13796 |

Runinfo:28% hexanes, OJ column, 230nm 0.550 ml/min dihydrocinnamyl pivalate

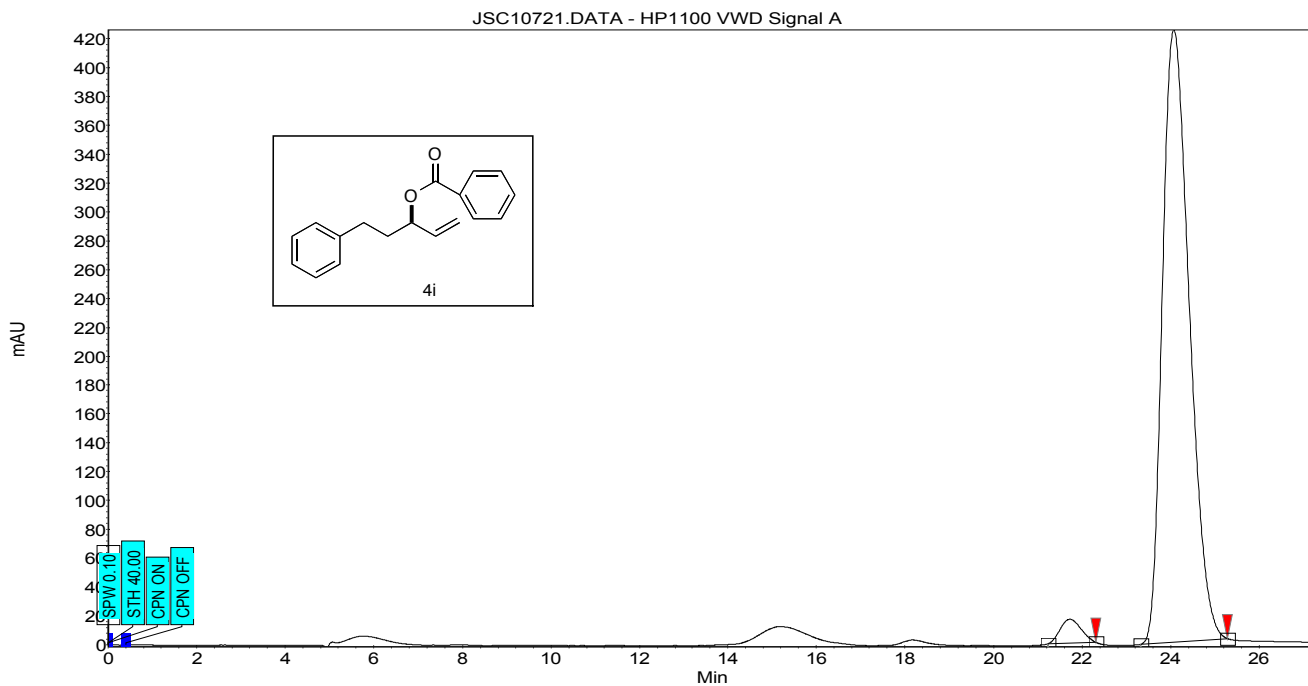

| Index | Name    | Time    | Area      | Height | Width | Area    |
|-------|---------|---------|-----------|--------|-------|---------|
|       |         | [Min]   | [mAU*min] | [mAU]  | [Min] | [%]     |
| 1     | UNKNOWN | 21.7151 | 8.9507    | 16.49  | 0.54  | 2.912   |
| 2     | UNKNOWN | 24.0698 | 298.4579  | 424.47 | 0.66  | 97.088  |
| Total |         |         | 307.4086  |        |       | 100.000 |

Runinfo:28% hexanes, OJ column, 230nm 0.550 ml/min dihydrocinnamyl pivalate

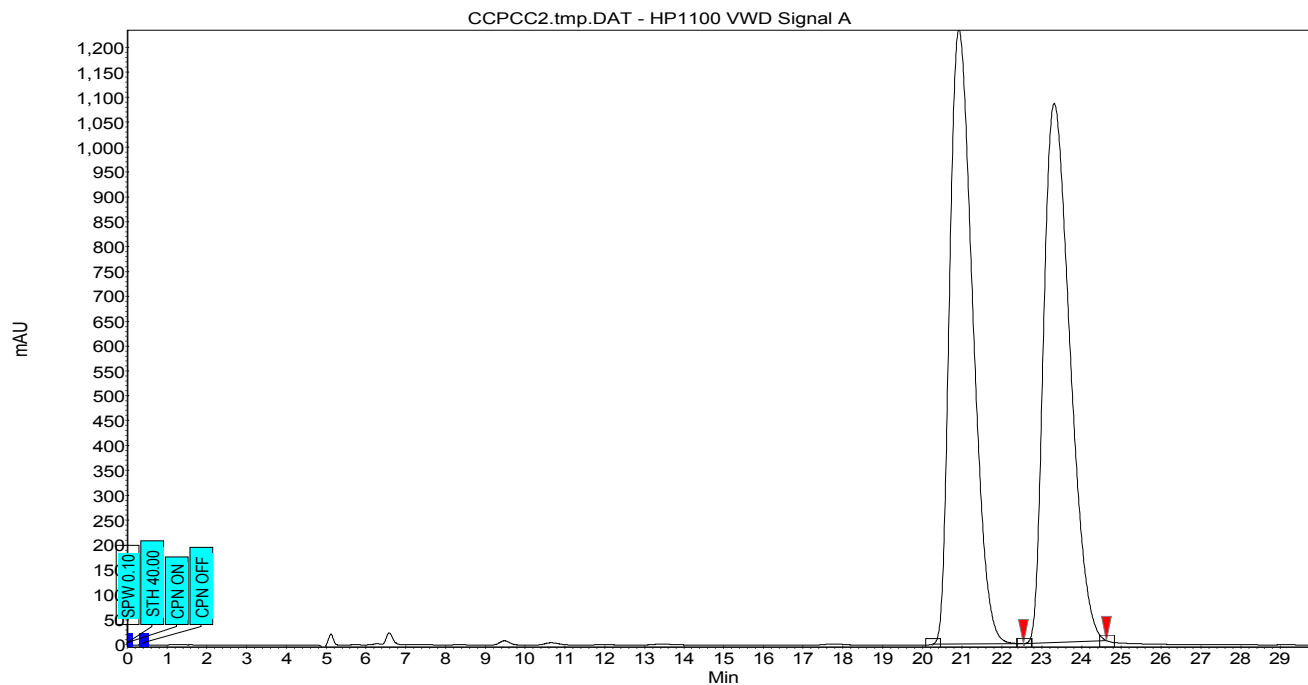

| Index | Name    | Time    | Area      | Height  | Width | Area    |
|-------|---------|---------|-----------|---------|-------|---------|
|       |         | [Min]   | [mAU*min] | [mAU]   | [Min] | [%]     |
| 1     | UNKNOWN | 20.9205 | 826.4160  | 1234.04 | 0.64  | 50.103  |
| 2     | UNKNOWN | 23.3140 | 823.0108  | 1083.17 | 0.72  | 49.897  |
| Total |         |         | 1649.4268 |         |       | 100.000 |

Runinfo:28% hexanes, OJ column, 230nm 1 ml/min dihydrocinnamyl para-methylbenzoate

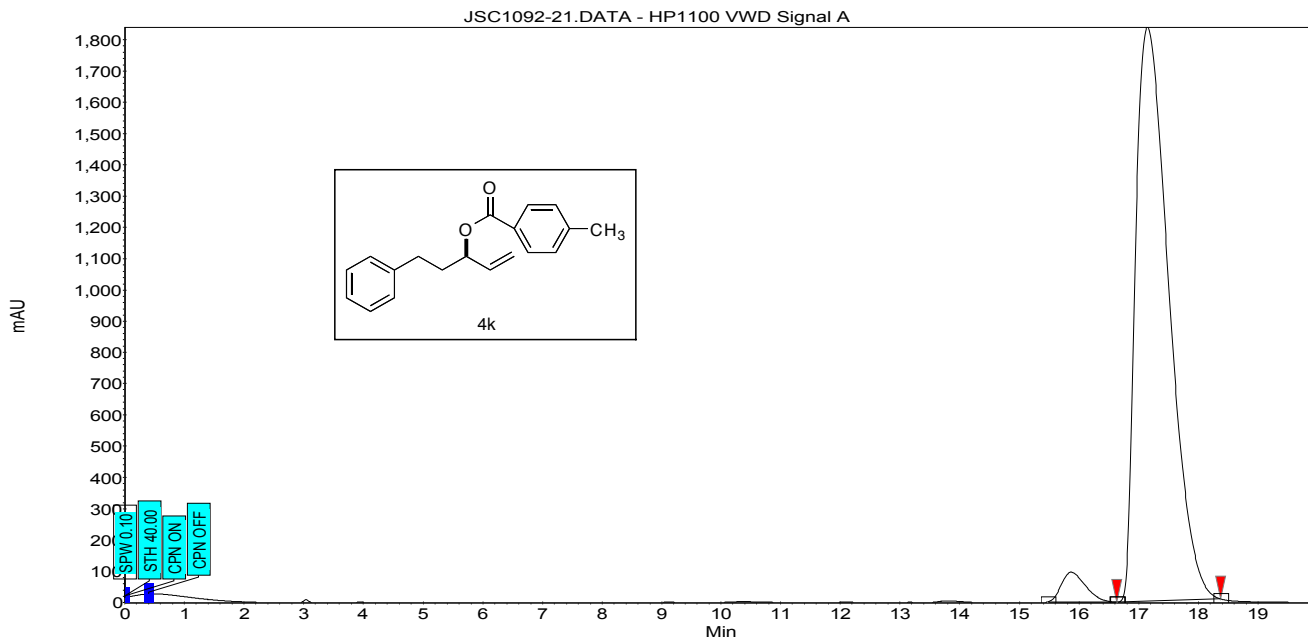

| Index | Name    | Time    | Area      | Height  | Width | Area    |
|-------|---------|---------|-----------|---------|-------|---------|
|       |         | [Min]   | [mAU*min] | [mAU]   | [Min] | [%]     |
| 1     | UNKNOWN | 15.8721 | 44.4754   | 95.32   | 0.44  | 3.622   |
| 2     | UNKNOWN | 17.1512 | 1183.6092 | 1835.90 | 0.62  | 96.378  |
| Total |         |         | 1228.0846 |         |       | 100.000 |

Runinfo:28% hexanes, OJ column, 230nm 1 ml/min dihydrocinnamyl para-methylbenzoate

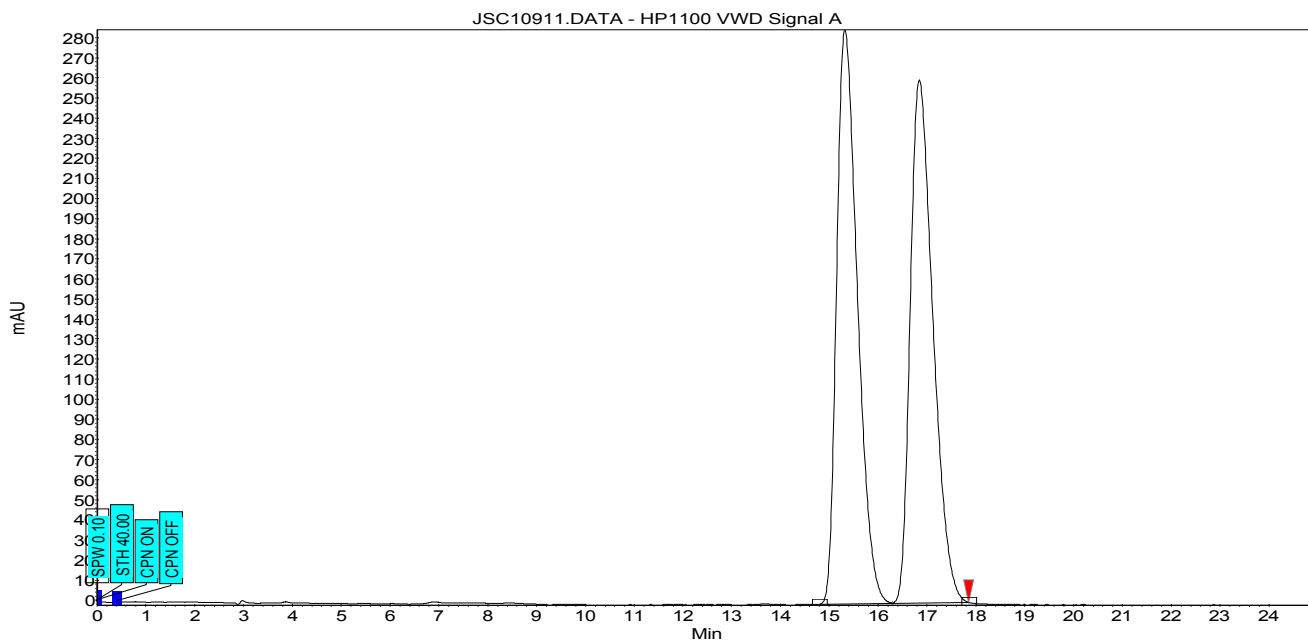

| Index | Name    | Time    | Area      | Height | Width | Area    |
|-------|---------|---------|-----------|--------|-------|---------|
|       |         | [Min]   | [mAU*min] | [mAU]  | [Min] | [%]     |
| 1     | UNKNOWN | 15.3198 | 140.9029  | 286.02 | 0.46  | 50.102  |
| 2     | UNKNOWN | 16.8411 | 140.3318  | 260.29 | 0.50  | 49.898  |
| Total |         |         | 281.2347  |        |       | 100.000 |

Runinfo:28% hexanes, OJ column, 230nm 1 ml/min dihydrocinnamyl para-methoxybenzoate

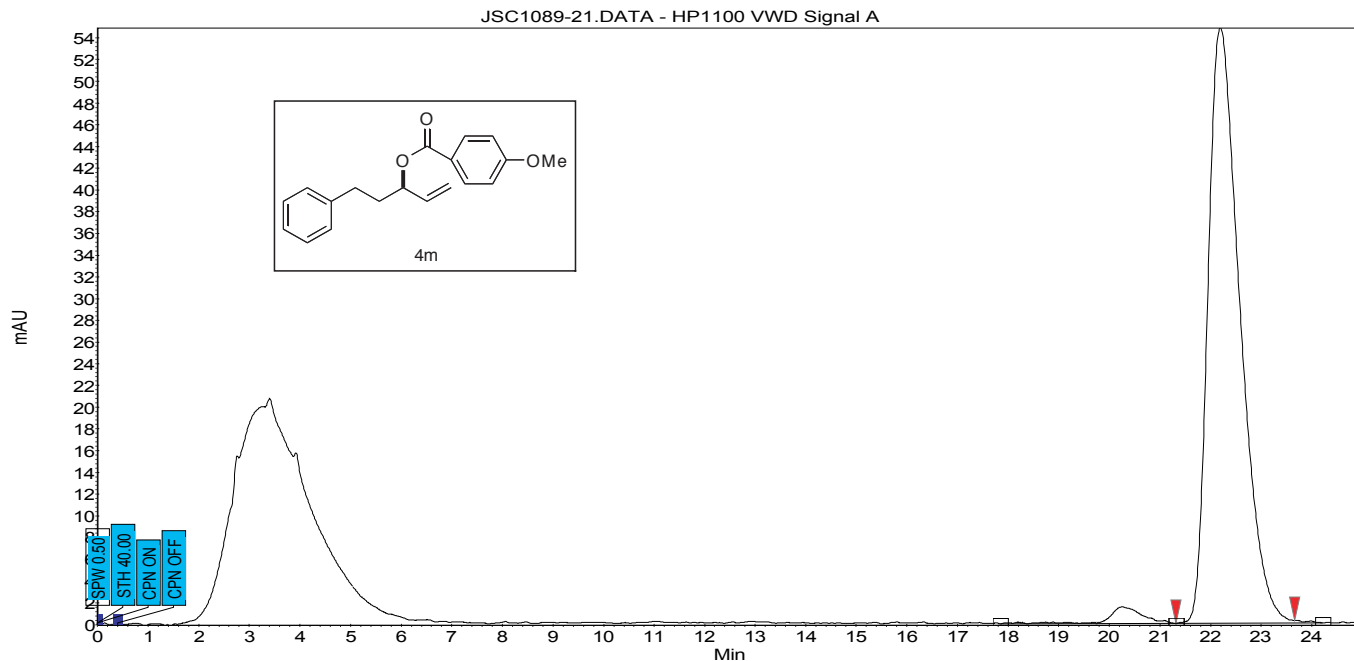

| Index | Name    | Time    | Area      | Height | Width | Area    |
|-------|---------|---------|-----------|--------|-------|---------|
|       |         | [Min]   | [mAU*min] | [mAU]  | [Min] | [%]     |
| 1     | UNKNOWN | 20.2519 | 1.0496    | 1.53   | 0.60  | 2.558   |
| 2     | UNKNOWN | 22.1899 | 39.9795   | 54.79  | 0.68  | 97.442  |
| Total |         |         | 41.0291   |        |       | 100.000 |

Runinfo:28% hexanes, OJ column, 230nm 1 ml/min dihydrocinnamyl para-methoxybenzoate

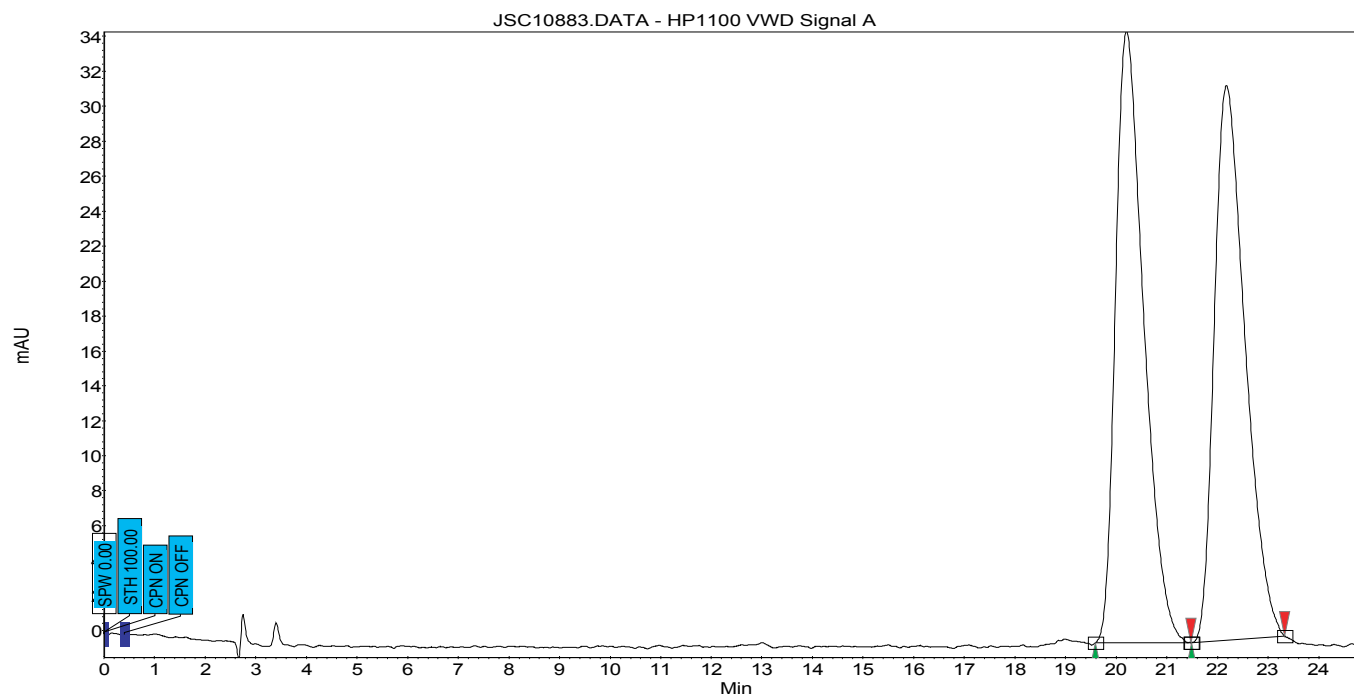

| Index | Name    | Time    | Area      | Height | Width | Area    |
|-------|---------|---------|-----------|--------|-------|---------|
|       |         | [Min]   | [mAU*min] | [mAU]  | [Min] | [%]     |
| 1     | UNKNOWN | 20.2035 | 22.5812   | 34.95  | 0.60  | 50.289  |
| 2     | UNKNOWN | 22.1802 | 22.3217   | 31.71  | 0.66  | 49.711  |
| Total |         |         | 44.9029   |        |       | 100.000 |

Method Info : OJ Column  
 0.1% IPA in heptanes  
 flow 2 mL/min  
 230 nm

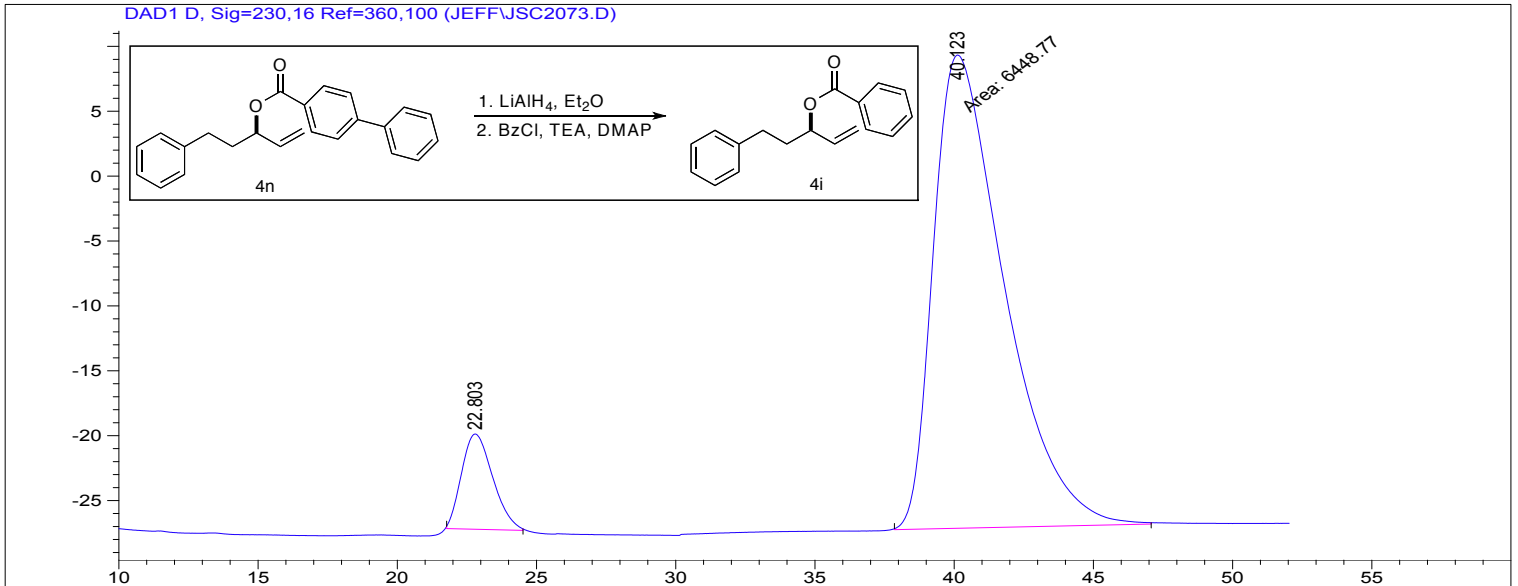

Signal 1: DAD1 D, Sig=230,16 Ref=360,100

| Peak # | RetTime [min] | Type | Width [min] | Area [mAU*s] | Height [mAU] | Area %  |
|--------|---------------|------|-------------|--------------|--------------|---------|
| 1      | 22.803        | BB   | 0.9804      | 571.59839    | 7.34120      | 8.1420  |
| 2      | 40.123        | MM   | 2.9478      | 6448.77197   | 36.46113     | 91.8580 |

Totals : 7020.37036 43.80233

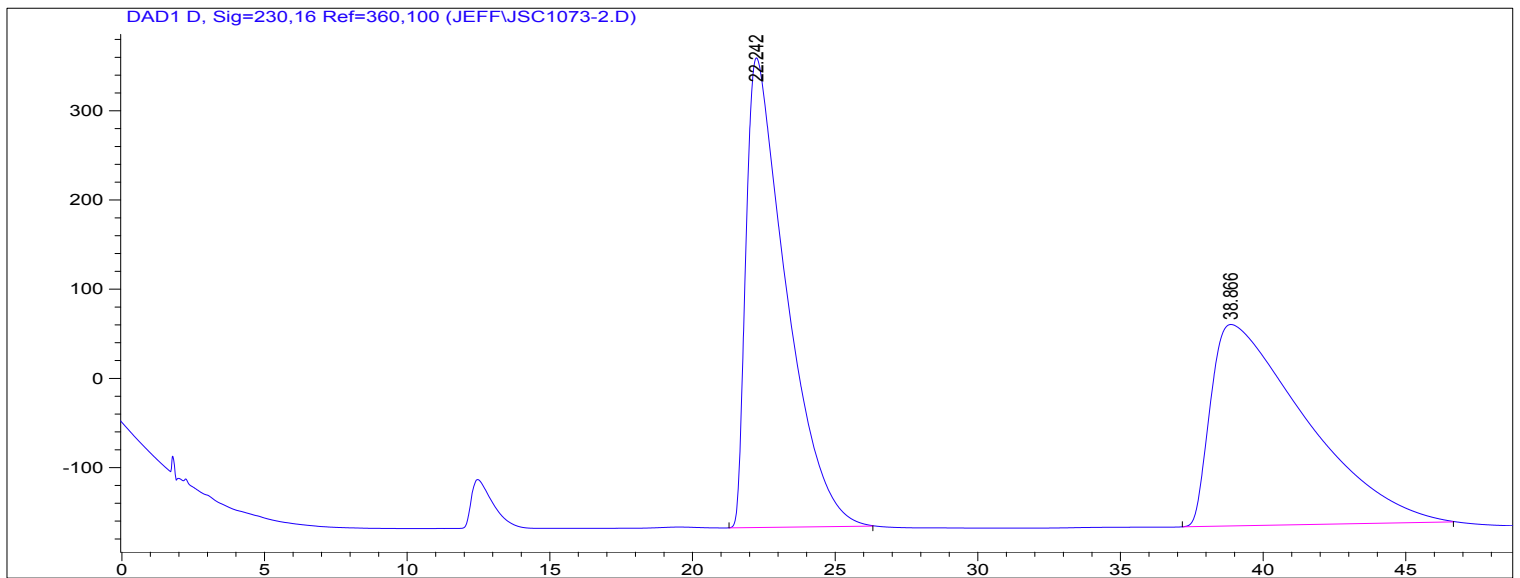

Signal 1: DAD1 D, Sig=230,16 Ref=360,100

| Peak # | RetTime [min] | Type | Width [min] | Area [mAU*s] | Height [mAU] | Area %  |
|--------|---------------|------|-------------|--------------|--------------|---------|
| 1      | 22.242        | BB   | 1.4040      | 5.15449e4    | 526.59698    | 49.7296 |
| 2      | 38.866        | BB   | 2.9971      | 5.21055e4    | 225.89069    | 50.2704 |

Totals : 1.03650e5 752.48767<sub>S40</sub>



Runinfo:28% hexanes, OJ column, 230nm 1 ml/min dihydrocinnamyl para-chlorobenzoate

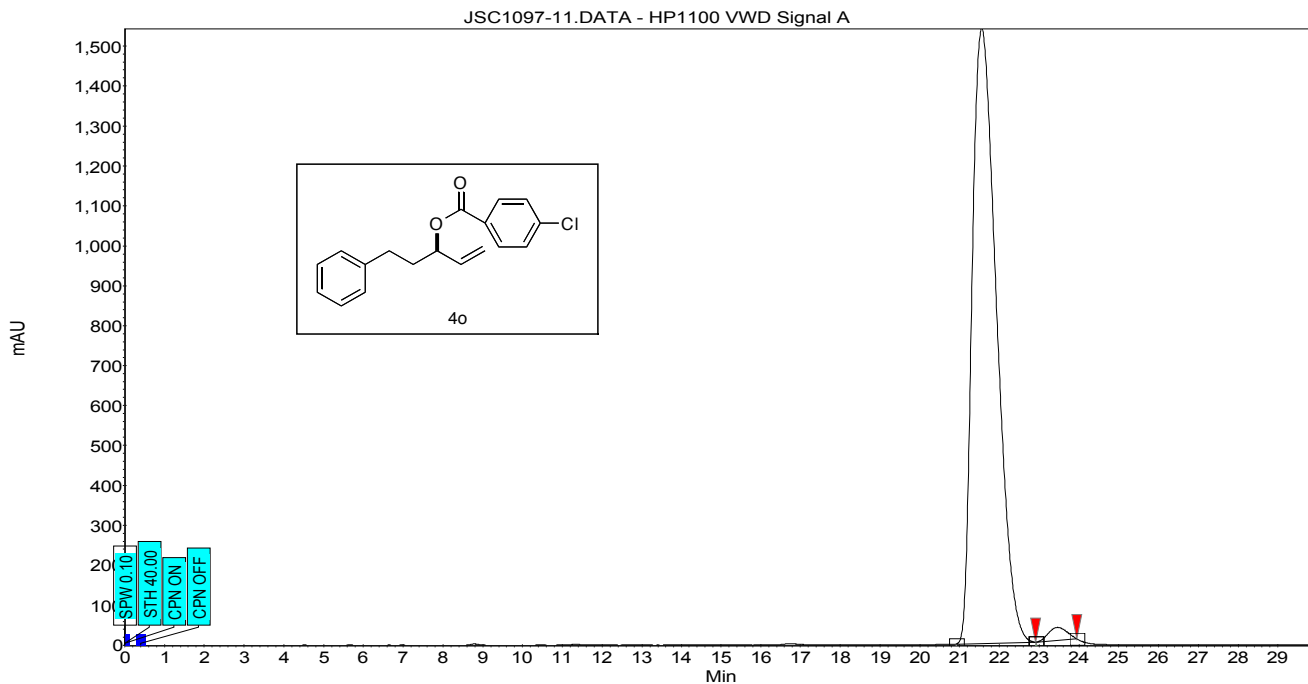

| Index | Name    | Time    | Area      | Height  | Width | Area    |
|-------|---------|---------|-----------|---------|-------|---------|
|       |         | [Min]   | [mAU*min] | [mAU]   | [Min] | [%]     |
| 1     | UNKNOWN | 21.5504 | 1084.5034 | 1539.27 | 0.67  | 98.422  |
| 2     | UNKNOWN | 23.4496 | 17.3830   | 32.54   | 0.55  | 1.578   |
| Total |         |         | 1101.8864 |         |       | 100.000 |

Runinfo:28% hexanes, OJ column, 230nm 1 ml/min dihydrocinnamyl para-methoxybenzoate

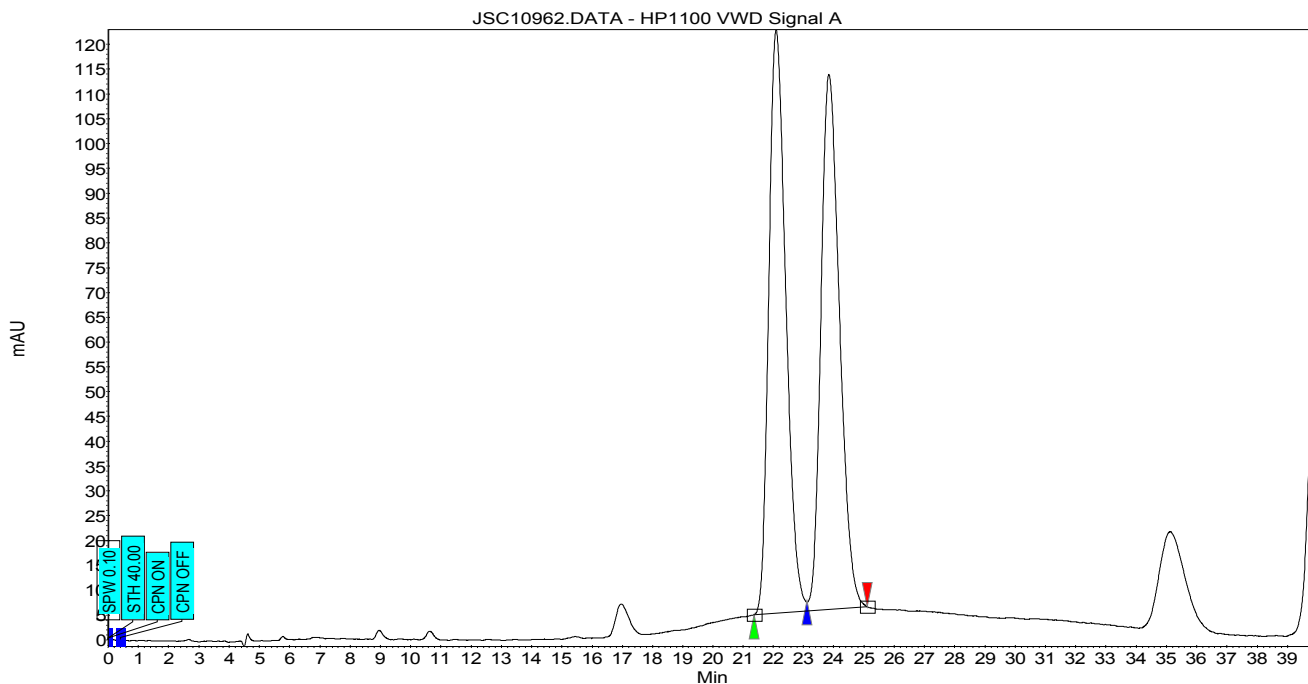

| Index | Name    | Time    | Area      | Height | Width | Area    |
|-------|---------|---------|-----------|--------|-------|---------|
|       |         | [Min]   | [mAU*min] | [mAU]  | [Min] | [%]     |
| 1     | UNKNOWN | 22.1027 | 76.5635   | 117.63 | 0.61  | 49.947  |
| 2     | UNKNOWN | 23.8469 | 76.7274   | 107.80 | 0.67  | 50.053  |
| Total |         |         | 153.2909  |        |       | 100.000 |

Runinfo:28% hexanes, OJ column, 230nm 2 ml/min, 35 degrees

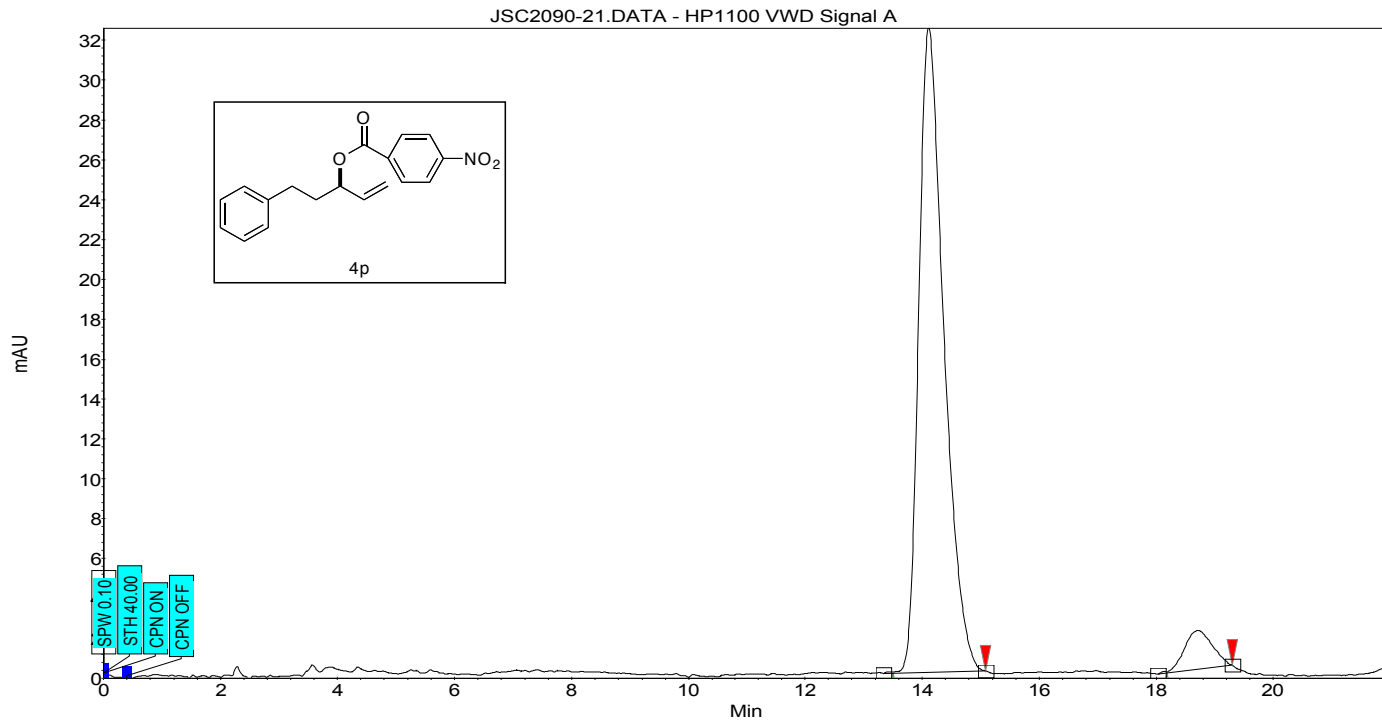

| Index | Name    | Time    | Area      | Height | Width | Area    |
|-------|---------|---------|-----------|--------|-------|---------|
|       |         | [Min]   | [mAU*min] | [mAU]  | [Min] | [%]     |
| 1     | UNKNOWN | 14.1085 | 16.1147   | 32.31  | 0.46  | 93.820  |
| 2     | UNKNOWN | 18.7016 | 1.0614    | 1.94   | 0.54  | 6.180   |
| Total |         |         | 17.1761   |        |       | 100.000 |

Runinfo:28% hexanes, OJ column, 230nm 2 ml/min, 35 degrees cinnamyl hydroxyl

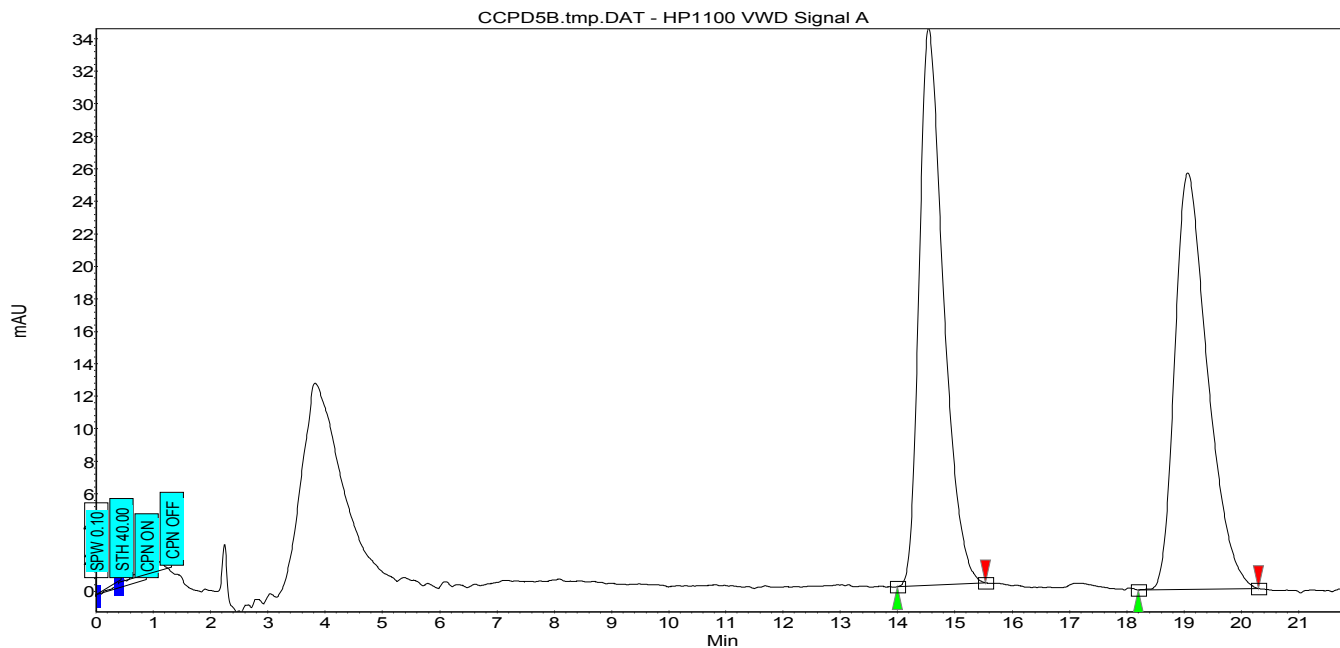

| Index | Name    | Time    | Area      | Height | Width | Area    |
|-------|---------|---------|-----------|--------|-------|---------|
|       |         | [Min]   | [mAU*min] | [mAU]  | [Min] | [%]     |
| 1     | UNKNOWN | 14.5446 | 16.8792   | 34.26  | 0.45  | 49.903  |
| 2     | UNKNOWN | 19.0601 | 16.9446   | 25.62  | 0.61  | 50.097  |
| Total |         |         | 33.8238   |        |       | 100.000 |

Runinfo:28% hexanes, OJ column, 230nm 1 ml/min dihydrocinnamyl para-chlorobenzoate

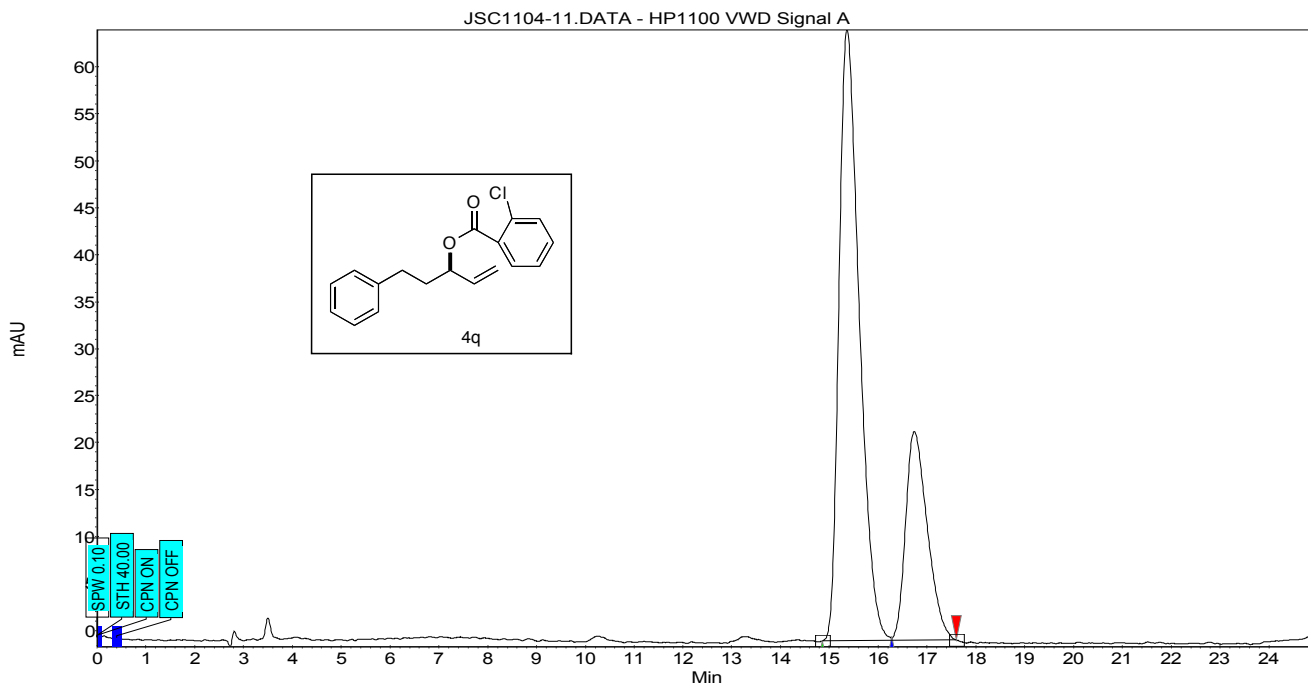

| Index | Name    | Time    | Area      | Height | Width | Area    |
|-------|---------|---------|-----------|--------|-------|---------|
|       |         | [Min]   | [mAU*min] | [mAU]  | [Min] | [%]     |
| 1     | UNKNOWN | 15.3682 | 31.3365   | 65.04  | 0.45  | 73.241  |
| 2     | UNKNOWN | 16.7442 | 11.4491   | 22.18  | 0.48  | 26.759  |
| Total |         |         | 42.7856   |        |       | 100.000 |

Runinfo:28% hexanes, OJ column, 230nm 1 ml/min dihydrocinnamyl benzoate

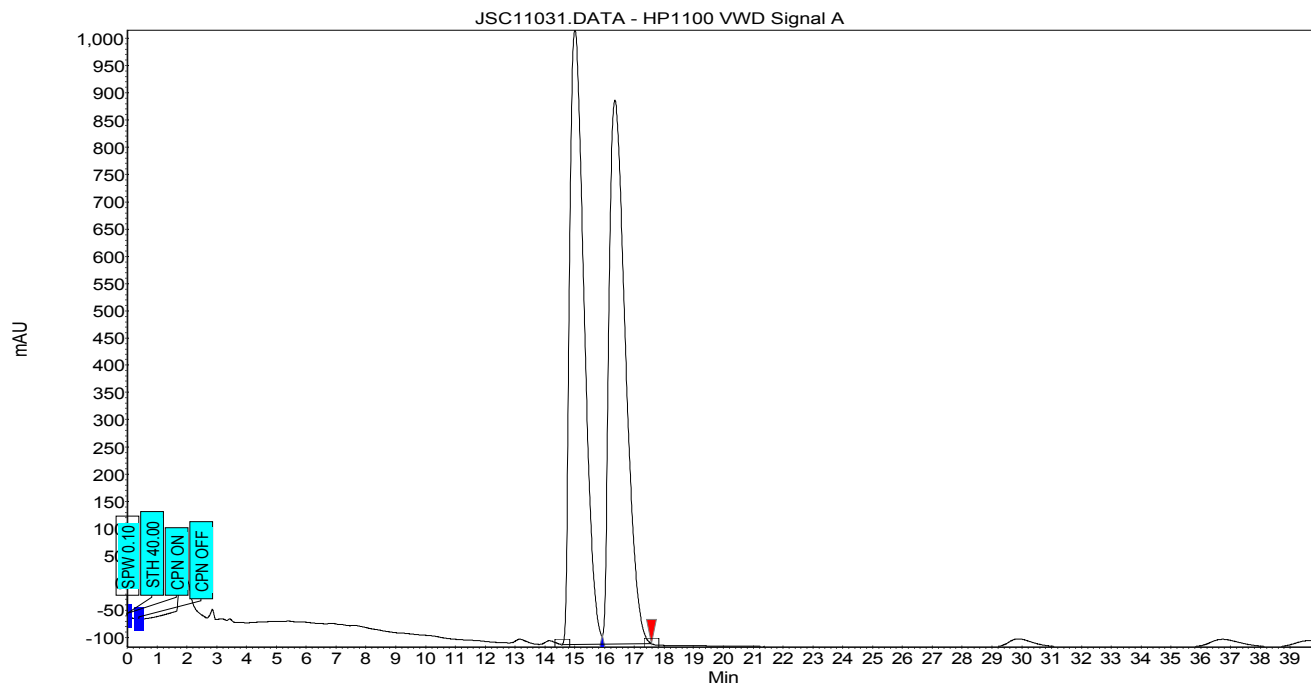

| Index | Name    | Time    | Area      | Height  | Width | Area    |
|-------|---------|---------|-----------|---------|-------|---------|
|       |         | [Min]   | [mAU*min] | [mAU]   | [Min] | [%]     |
| 1     | UNKNOWN | 15.0097 | 634.7193  | 1127.80 | 0.54  | 49.873  |
| 2     | UNKNOWN | 16.3469 | 637.9589  | 997.82  | 0.61  | 50.127  |
| Total |         |         | 1272.6782 |         |       | 100.000 |

Method Info : OJ Column  
 0.1% IPA in heptanes  
 flow 2 mL/min  
 230 nm

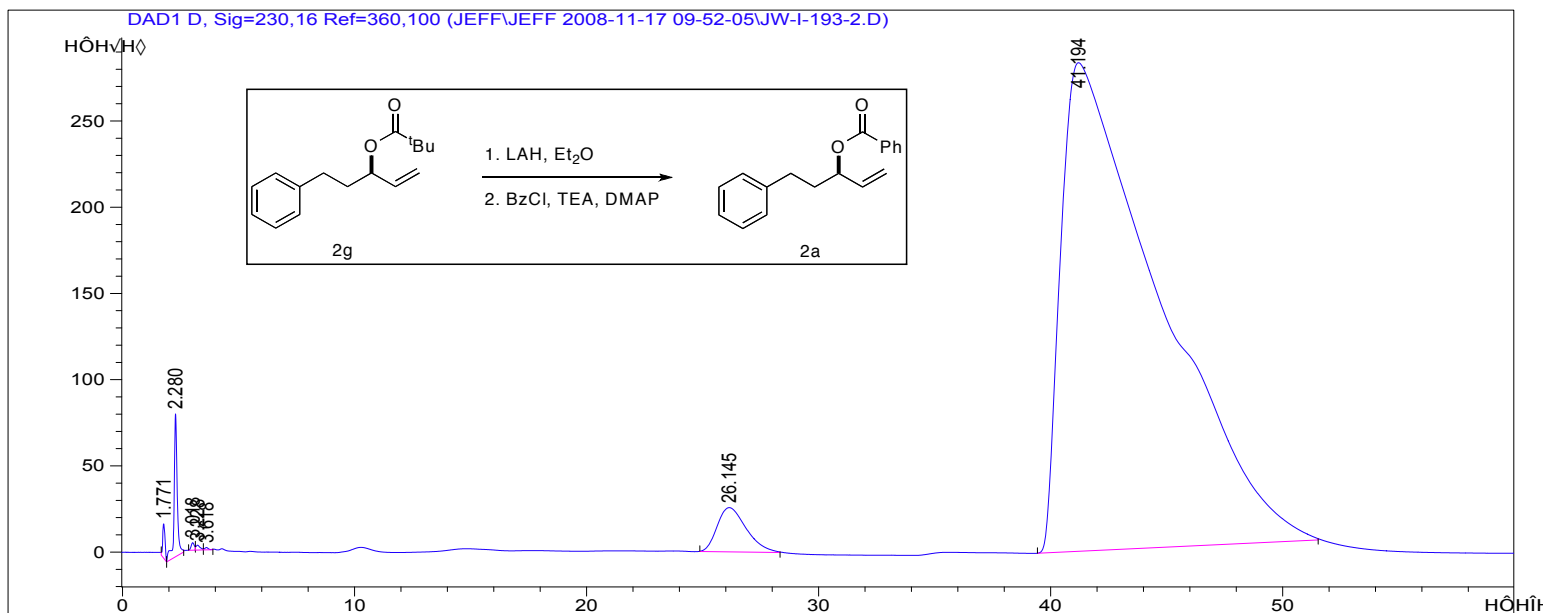

Signal 1: DAD1 D, Sig=230,16 Ref=360,100

| Peak # | RetTime [min] | Type | Width [min] | Area [mAU*s] | Height [mAU] | Area %  |
|--------|---------------|------|-------------|--------------|--------------|---------|
| 6      | 26.145        | BB   | 1.0220      | 2228.98437   | 25.64521     | 2.5665  |
| 7      | 41.194        | BB   | 3.6474      | 8.36166e4    | 283.30359    | 96.2782 |

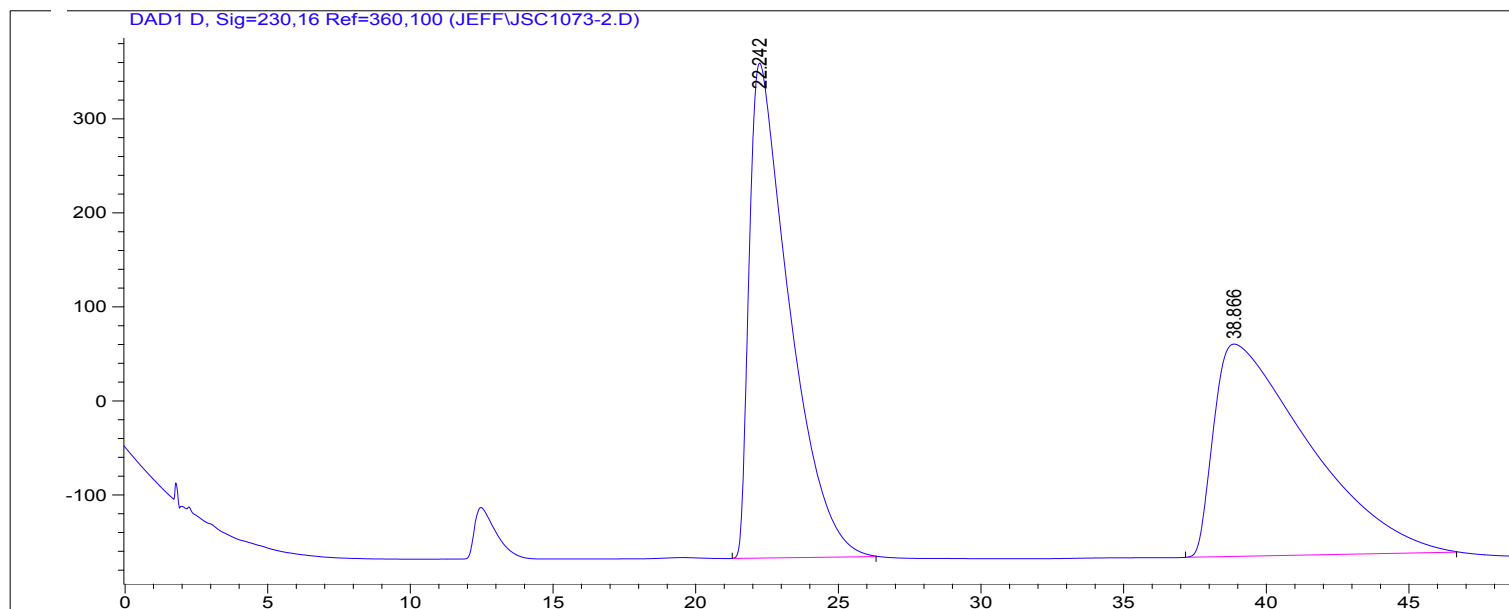

Signal 1: DAD1 D, Sig=230,16 Ref=360,100

| Peak # | RetTime [min] | Type | Width [min] | Area [mAU*s] | Height [mAU] | Area %  |
|--------|---------------|------|-------------|--------------|--------------|---------|
| 1      | 22.242        | BB   | 1.4040      | 5.15449e4    | 526.59698    | 49.7296 |
| 2      | 38.866        | BB   | 2.9971      | 5.21055e4    | 225.89069    | 50.2704 |

Totals : 1.03650e5 752.48757

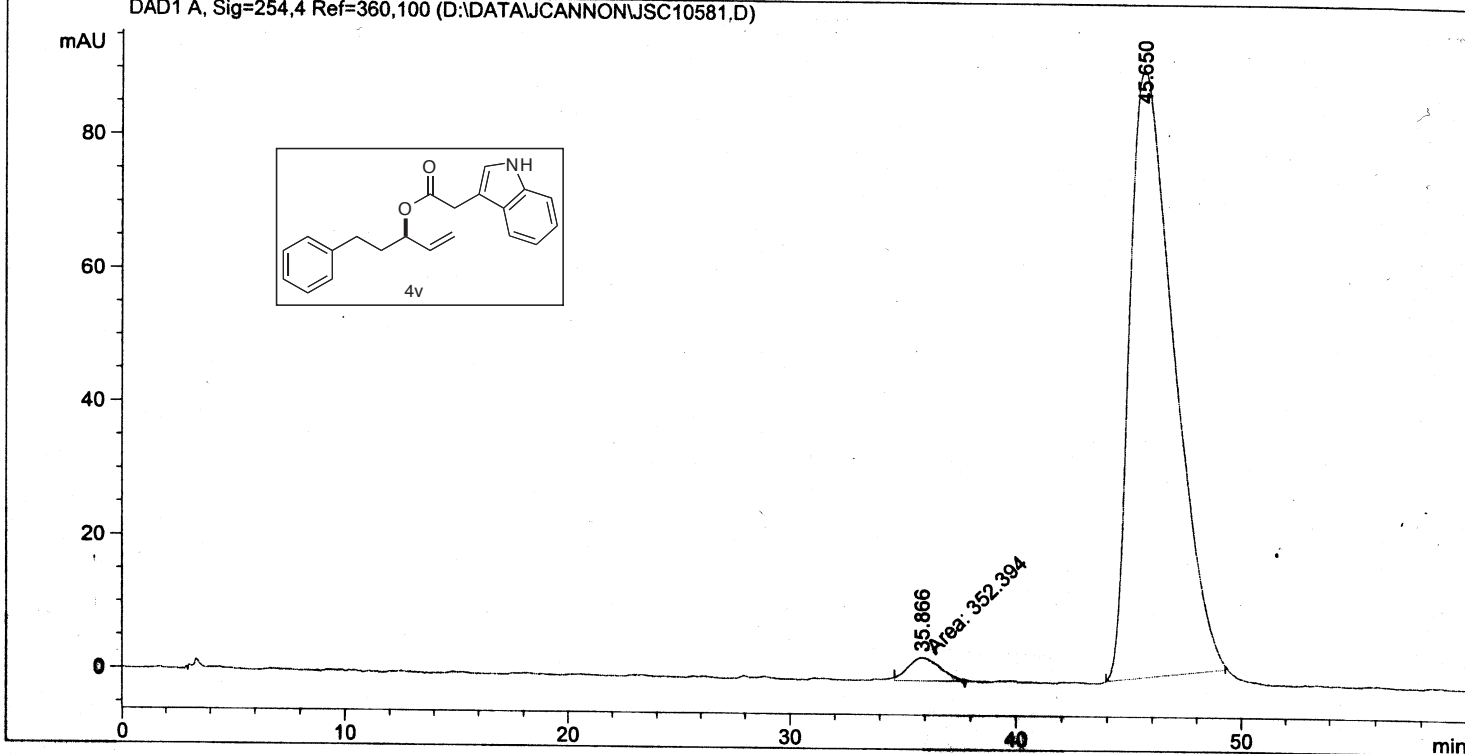

Signal 1: DAD1 A, Sig=254,4 Ref=360,100

| Peak # | RetTime [min] | Type | Width [min] | Area [mAU*s] | Height [mAU] | Area %  |
|--------|---------------|------|-------------|--------------|--------------|---------|
| 1      | 35.866        | MM   | 1.6528      | 352.39398    | 3.55345      | 2.7464  |
| 2      | 45.650        | BB   | 1.6192      | 1.24785e4    | 91.03713     | 97.2536 |

Totals : 1.28309e4 94.59059

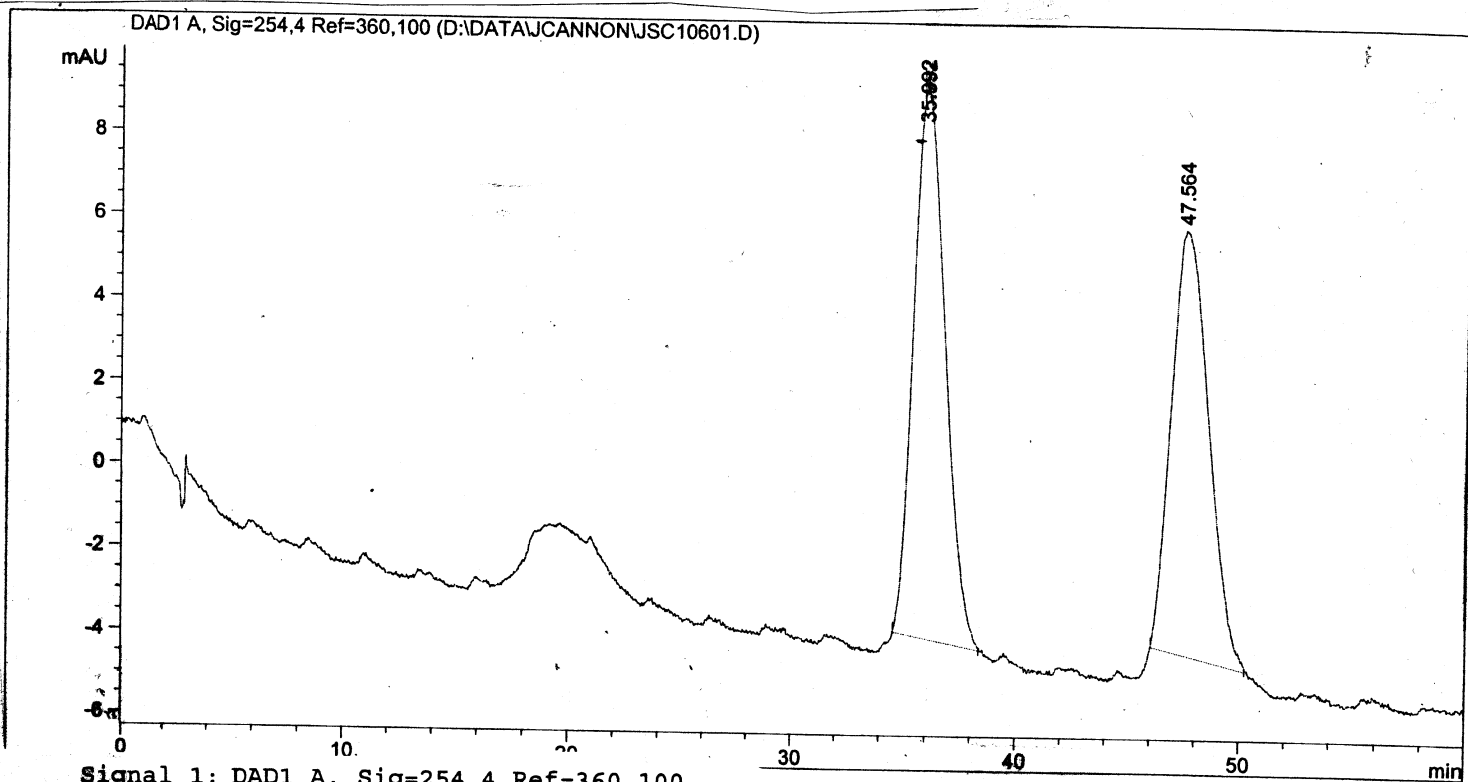

Signal 1: DAD1 A, Sig=254,4 Ref=360,100

| Peak # | RetTime [min] | Type | Width [min] | Area [mAU*s] | Height [mAU] | Area %  |
|--------|---------------|------|-------------|--------------|--------------|---------|
| 1      | 35.992        | BB   | 1.1477      | 1286.02307   | 13.18718     | 52.0109 |
| 2      | 47.564        | BB   | 1.3630      | 1186.58167   | 10.23144     | 47.9891 |

Method Info : OJ Column  
 0.1% IPA in heptanes  
 flow 2 mL/min  
 230 nm

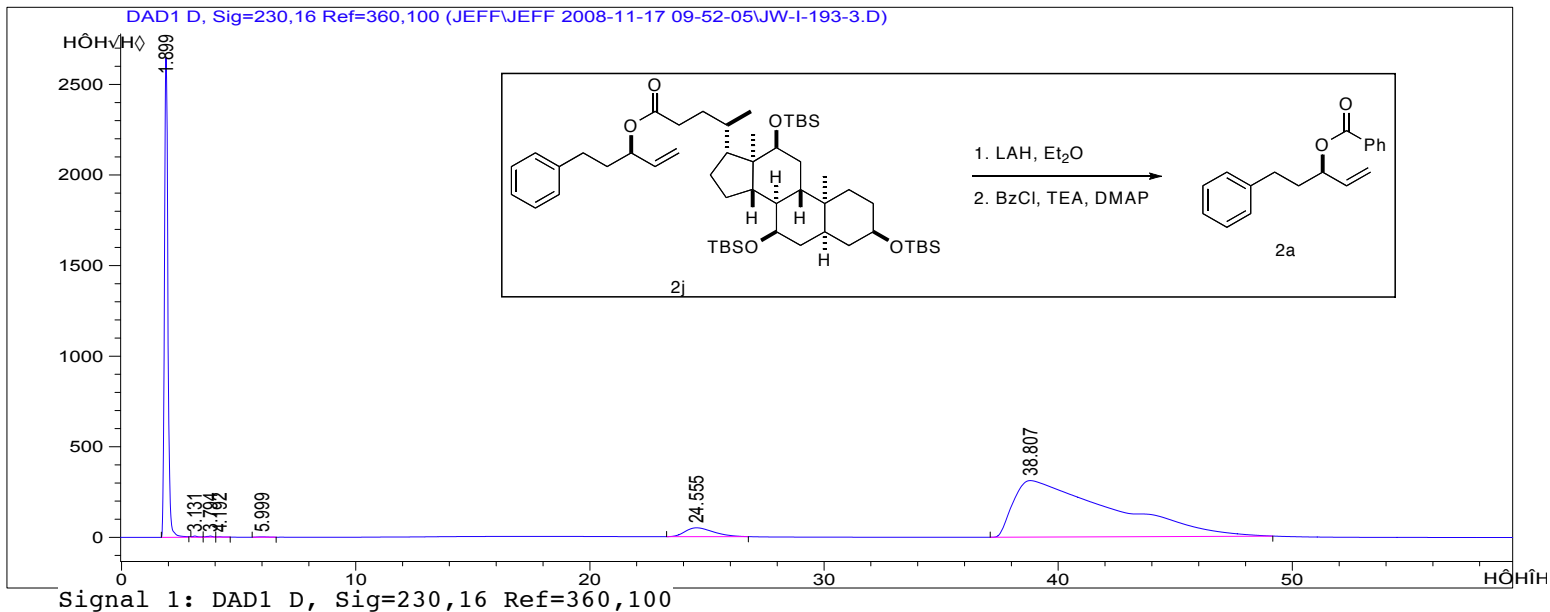

| Peak # | RetTime [min] | Type | Width [min] | Area [mAU*s] | Height [mAU] | Area %  |
|--------|---------------|------|-------------|--------------|--------------|---------|
| 6      | 24.555        | BB   | 1.1846      | 4140.99658   | 48.96955     | 3.3555  |
| 7      | 38.807        | BB   | 3.5981      | 9.14118e4    | 312.18826    | 74.0730 |

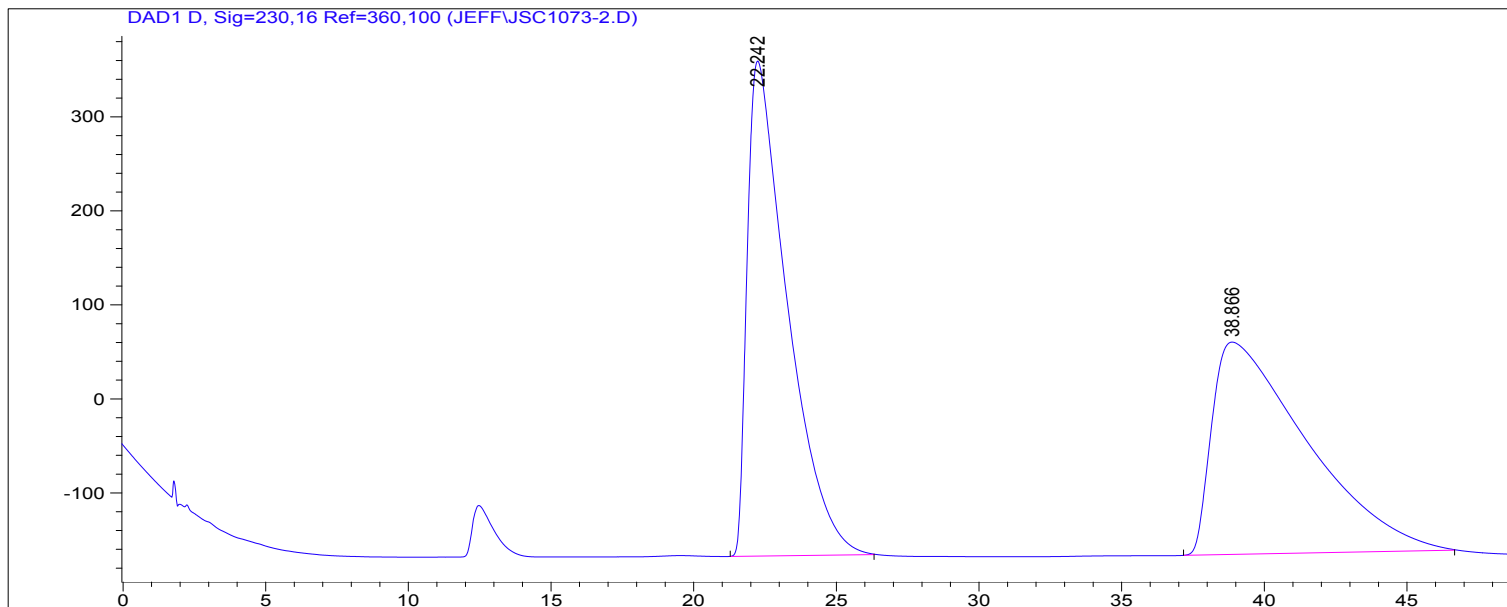

| Peak # | RetTime [min] | Type | Width [min] | Area [mAU*s] | Height [mAU] | Area %  |
|--------|---------------|------|-------------|--------------|--------------|---------|
| 1      | 22.242        | BB   | 1.4040      | 5.15449e4    | 526.59698    | 49.7296 |
| 2      | 38.866        | BB   | 2.9971      | 5.21055e4    | 225.89069    | 50.2704 |

Totals : 1.03650e5 752.48757
